# Supplementary material for: There is no universal mechanism for the cleavage of RNA model compounds in the presence of metal ion catalysts
Source: Royal Society of Chemistry journal article supplement (doi:10.1039/c3ob41554f), 2013-01-01
Supplement: c3ob41554f.pdf [file c3ob41554f.pdf]

### Electronic Supporting Information

There is no universal mechanism for the cleavage of RNA model compounds in the presence of metal ion catalysts

Heidi Korhonen, Timo Koivusalo, Suvi Toivola and Satu Mikkola  
University of Turku, Department of Chemistry, FIN-20014 Turku, Finland

Calculation of rate constants for the uncatalysed cleavage of uridine 3'-alkyl esters

Rate constants for the uncatalysed cleavage were calculated using parameters reported by Kosonen & *al.*<sup>1</sup> (Kosonen;Yousefi-Salakdeh;Strömberg;& Lönnberg, 1998). Partial rate constants reported for the cleavage of uridine 3'-esters 4c, 4e, 4g and 4h allowed calculation of  $\beta_{LG}$  values for these processes. Using  $\beta_{LG}$  values obtained and known  $pK_a$  values<sup>2</sup> for the leaving group alcohols, partial rate constants for the cleavage of other corresponding alkyl esters were calculated. The rate constant for the uncatalysed cleavage at a given pH could then be calculated using equation 1. from Ref. 1.

$$\text{Eq. 1.} \quad k_{\text{obs}} = (k_a[H^+]^2/K + k_b[H^+]/K + k_c + k_dK_w/[H^+]) / ([H^+]/K + 1)$$

Rate constants  $k_a$ ,  $k_b$ ,  $k_c$  and  $k_d$  refer to acid catalyzed reaction of neutral phosphodiester, acid catalyzed reaction of monoanionic phosphodiester, spontaneous cleavage of monoanionic phosphodiester and base-catalysed cleavage of monoanionic phosphodiester, respectively.  $K$  is the equilibrium constant for deprotonation of the neutral phosphate to a monoanionic species. A value of 12.4 was used for the water autoprotolysis constant  $pK_w$  at 90 °C.<sup>3</sup> The proportions of partial reactions were calculated by dividing the corresponding term with  $k_{\text{obs}}$ . Calculated rate constants as a function of pH are shown in Fig. S1.

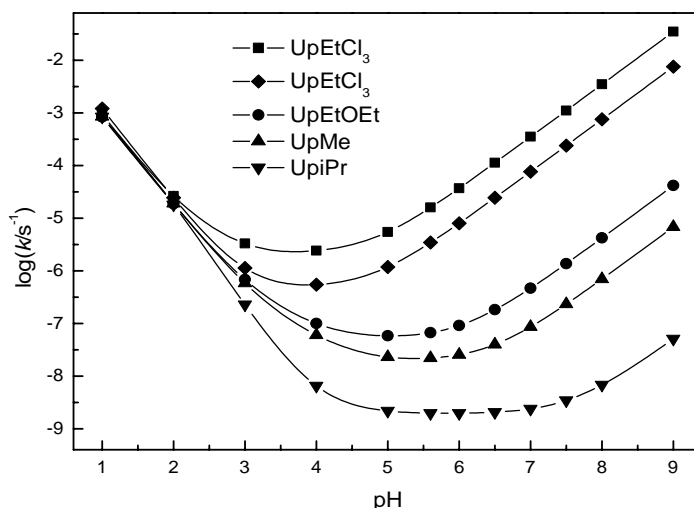

Fig. S1. Calculated rate constants for the cleavage of uridine 3'-alkyl phosphates as a function of pH. Calculation is based on parameters reported by Kosonen *et al.* 1. UpEtCl₃ (uridine 3'-trichloroethylphosphate (4h), UpEtCl₂ (uridine 3'-dichloroethylphosphate (4g), UpEtOEt (uridine 3'-ethoxyethylphosphate (4e), UpMe (uridine 3'-methylphosphate (4d), UpiPr (uridine 3'-isopropylphosphate (4b).

# Rate constants for the uncatalysed cleavage of UpEtCl<sub>3</sub> and aryl esters at different temperatures

Rate constants of the cleavage of UpEtCl<sub>3</sub> were determined at three temperatures, 90 °C, 75 °C and 60 °C, at pH 6.5. pH was adjusted with MOPSO buffer. pK<sub>a</sub> of MOPSO at different temperatures was calculated on the basis of data found in literature<sup>4</sup> and hydroxide ion concentration under experimental conditions was calculated using pK<sub>w</sub> values from *ref.* 3. Logarithmic second-order rate constants for hydroxide ion catalyzed reaction were plotted against 1/T according to Arrhenius equation. Parameters obtained from a linear fit were used to calculate *k*<sub>2</sub> values at lower temperatures. Rate constants for the background reaction of uridine 3'-aryl esters 3a-e at 50 °C we calculated by interpolation using experimentally determined values obtained at pH 6.5 at 25 °C and 90 °C.

Table S1. Calculation of rate constants of the background reaction for the cleavage of UpEtCl<sub>3</sub> at different temperatures.

|                                                           | T=363 K               | T=348 K               | T=333 K              | T=323 K               | T=298 K               |
|-----------------------------------------------------------|-----------------------|-----------------------|----------------------|-----------------------|-----------------------|
| <i>k</i> <sub>obs</sub> /10 <sup>-6</sup> s <sup>-1</sup> | 26.3±0.4              | 5.80±0.05             | 1.62±0.07            | 0.46 <sup>a</sup>     | 0.021 <sup>a</sup>    |
| pK <sub>w</sub> <sup>b</sup>                              | 12.4                  | 12.7                  | 13.0                 | 13.3                  | 14.0                  |
| [HO <sup>-</sup> ]/M, pH 6.5                              | 1.26x10 <sup>-6</sup> | 6.31x10 <sup>-7</sup> | 3.2x10 <sup>-7</sup> | 1.58x10 <sup>-7</sup> | 3.17x10 <sup>-8</sup> |
| <i>k</i> <sub>2</sub> /M <sup>-1</sup> s <sup>-1</sup>    | 20.9                  | 9.21                  | 5.06                 | 2.93 <sup>a</sup>     | 0.65 <sup>a</sup>     |

<sup>a</sup> Calculated on the basis of values obtained at higher temperatures as explained in the text. <sup>b</sup> From *Ref.* 3

Table S2. Rate constants of cleavage of uridine 3'-alkyl phosphates in the presence of monometallic Zn<sup>2+</sup> and Cu<sup>2+</sup> complexes at 90 °C.

|                                                                                                         | UpEtCl <sub>3</sub><br>4h | UpEtCl <sub>2</sub><br>4g | UpEtF <sub>2</sub><br>4f | UpEtOEt<br>4e | UpMe<br>4d | UpEt<br>4c  | UpiPr<br>4b | UpnPe<br>4a |
|---------------------------------------------------------------------------------------------------------|---------------------------|---------------------------|--------------------------|---------------|------------|-------------|-------------|-------------|
| pK <sub>a</sub> <sup>a</sup>                                                                            | 12.2                      | 12.9                      | 13.0                     | 14.8          | 15.5       | 15.8        | 17.1        | 17.3        |
| <i>k</i> <sub>0</sub> /10 <sup>-6</sup> s <sup>-1</sup> pH 6.6 <sup>b</sup>                             | 72.6                      | 12.3                      | 9.54                     | 0.13          | 0.029      | 0.018       | 0.0021      | 0.0016      |
| <i>k</i> <sub>obs</sub> /10 <sup>-6</sup> s <sup>-1</sup> pH 6.6<br>10 mM Zn <sup>2+</sup> -8           | 2100±40                   | 1800±40                   |                          | 251±3         |            | 54±1        | 1.7±0.1     |             |
| <i>k</i> <sub>obs</sub> /10 <sup>-6</sup> s <sup>-1</sup> pH 6.6<br>2 mM Zn <sup>2+</sup> -8            | 400±30                    | 320±10                    | 370±20                   | 55±3          | 62±2       |             | 0.11±0.01   | 0.14±0.01   |
| <i>k</i> <sub>obs</sub> /10 <sup>-6</sup> s <sup>-1</sup> pH 6.6<br>2 mM Zn <sup>2+</sup> -9            | 110±3                     | 40.0±0.2                  |                          | 5.6±0.2       |            | 0.67±0.05   | 0.17±0.04   |             |
| <i>k</i> <sub>obs</sub> /10 <sup>-6</sup> s <sup>-1</sup> pH 6.6<br>2 mM Zn <sup>2+</sup> -9            | 73±4                      | 30±1                      | 27±1                     | 3.6±0.2       | 5.3±0.2    |             | 0.25±0.01   | 0.11±0.01   |
| <i>k</i> <sub>obs</sub> /10 <sup>-6</sup> s <sup>-1</sup> pH 6.6<br>2 mM Zn <sup>2+</sup> -10           | 210±3                     | 70±1                      |                          | 5.4±0.3       |            | 0.50±0.02   | 0.05±0.02   |             |
| <i>k</i> <sub>obs</sub> /10 <sup>-6</sup> s <sup>-1</sup> pH 6.6<br>2 mM Zn <sup>2+</sup> -11           | 100±1                     | 20±1                      |                          | 0.17±0.01     |            | 0.045±0.004 | 0.009±0.002 |             |
| <i>k</i> <sub>obs</sub> /10 <sup>-6</sup> s <sup>-1</sup> pH 6.6<br>2 mM Zn <sup>2+</sup> -12           | 70±1                      | 20.0±0.1                  |                          | 0.17±0.04     |            | 0.06±0.02   | 0.017±0.001 |             |
| <i>k</i> <sub>obs</sub> /10 <sup>-6</sup> s <sup>-1</sup> pH 6.6<br>2 mM Zn <sup>2+</sup> -13           | 80.0±0.4                  | 20.0±0.2                  |                          | 0.16±0.01     |            | 0.033±0.005 | 0.015±0.004 |             |
| <i>k</i> <sub>obs</sub> /10 <sup>-6</sup> s <sup>-1</sup> pH 6.6<br>10 mM Cu <sup>2+</sup> -14          | 820±6                     | 180±2                     | 150±1                    | 39±3          | 44±4       |             | 3.0±0.2     | 1.9±0.1     |
| <i>k</i> <sub>obs</sub> /10 <sup>-6</sup> s <sup>-1</sup> pH 6.6<br>10 mM Cu <sup>2+</sup> -15          | 4400±60                   | 2100±300                  | 760±30                   | 290±2         | 60±1       |             | 9.1±0.3     | 13±1        |
| <i>k</i> <sub>0</sub> /10 <sup>-7</sup> s <sup>-1</sup> pH 5.6 <sup>b</sup>                             | 90.3                      | 18.9                      | 15                       | 0.59          | 0.21       | 0.13        | 0.02        | 0.02        |
| <i>k</i> <sub>obs</sub> /10 <sup>-6</sup> s <sup>-1</sup> pH 5.6<br>10 mM Zn <sup>2+</sup> -8           | 280±1                     | 150±1                     |                          | 58.3±0.5      |            | 11.3±0.3    | 0.94±0.05   |             |
| <i>k</i> <sub>obs</sub> /10 <sup>-5</sup> s <sup>-1</sup> pH 5.6<br>10 mM Zn <sub>aq</sub> <sup>c</sup> | 19.0±0.4                  | 7.6±0.1                   |                          | 3.5±0.3       |            | 1.6±0.2     | 0.32±0.01   |             |
| <i>k</i> <sub>obs</sub> /10 <sup>-6</sup> s <sup>-1</sup> pH 5.6<br>2 mM Zn <sub>aq</sub>               | 24±2                      | 13.5±0.3                  | 12.6±0.4                 | 2.6±0.1       |            |             |             |             |

<sup>a</sup> From *ref.* 2 except for that for 4a that was determined kinetically in 1 M NaOH at 25 °C using known β<sub>LG</sub> value of -1.34 from *ref.* 5. <sup>b</sup> Rate constant of the uncatalysed reaction calculated as described above. <sup>c</sup> Data taken from *ref.* 6.

Table S3. Rate constants of the cleavage of uridine 3'-aryl phosphates in the presence of monometallic Zn<sup>2+</sup> and Cu<sup>2+</sup> complexes.

|                                                                                                       | UpPh 3a     | Up- <i>p</i> ClPh 3b | Up- <i>o</i> ClPh 3c | UpPhCl <sub>2</sub> 3d | UpPhNO <sub>2</sub> 3e |
|-------------------------------------------------------------------------------------------------------|-------------|----------------------|----------------------|------------------------|------------------------|
| pK <sub>a</sub> <sup>a</sup>                                                                          | 9.95        | 9.38                 | 8.48                 | 7.51                   | 7.14                   |
| k <sub>uncat</sub> / 10 <sup>-6</sup> s <sup>-1</sup> , pH 6.5, 25 °C                                 | 0.39±0.1    | 1.33±0.02            | 1.84±0.04            | 13.2±0.3               | 43.1±0.6               |
| k <sub>obs</sub> / 10 <sup>-6</sup> s <sup>-1</sup> pH 6.5, 25 °C, 2 mM Zn <sup>2+</sup> -8           | 2.56±0.07   | 7.5±0.4              | 13.9±0.5             | 164±4                  | 770±20                 |
| k <sub>obs</sub> / 10 <sup>-6</sup> s <sup>-1</sup> pH 6.5, 25 °C, 10 mM Cu <sup>2+</sup> -14         | 10.1±0.2    | 48±3                 | 104±3                | 1420±40                | 5020±90                |
| k <sub>obs</sub> / 10 <sup>-6</sup> s <sup>-1</sup> pH 6.5, 25 °C, 10 mM Cu <sup>2+</sup> -15         | 44.6±0.8    | 222±9                | 377±8                | 3300±200               | 7700±200               |
| k <sub>uncat</sub> / 10 <sup>-4</sup> s <sup>-1</sup> , pH 6.5, 90 °C                                 | 3.65±0.05   | 9.1±0.2              | 11.7±0.4             | 51±3                   | 106±5                  |
| k / 10 <sup>-4</sup> s <sup>-1</sup> , pH 6.5, 90 °C, 2 mM Zn <sup>2+</sup> -9                        | 6.3±0.2     | 16.9±0.3             | 20.8±5               | 133±7                  | 580±40                 |
| k / 10 <sup>-4</sup> s <sup>-1</sup> , pH 6.5, 90 °C, 2 mM Zn <sup>2+</sup> -8                        | 46±2        | 91±3                 | 126±3                |                        |                        |
| k / 10 <sup>-4</sup> s <sup>-1</sup> , pH 6.5, 90 °C, 10 mM Cu <sup>2+</sup> -14                      | 10.4±0.5    | 40.0±0.2             | 52±2                 |                        |                        |
| k / 10 <sup>-4</sup> s <sup>-1</sup> , pH 6.5, 90 °C, 10 mM Cu <sup>2+</sup> -15                      | 82.0±0.4    | 280±2                | 540±20               |                        |                        |
| k <sub>uncat</sub> / 10 <sup>-6</sup> s <sup>-1</sup> , pH 5.9, 25 °C <sup>b</sup>                    | 0.25±0.02   | 0.68±0.02            | 0.95±0.01            | 5.06±0.04              | 18.9±0.1               |
| k / 10 <sup>-6</sup> s <sup>-1</sup> pH 5.9, 25 °C, 10 mM Zn <sup>2+</sup> <sub>aq</sub> <sup>b</sup> | 0.71±0.02   | 2.4±0.2              | 4.35±0.03            | 58.6±0.8               | 620±20                 |
| k / 10 <sup>-6</sup> s <sup>-1</sup> pH 5.9, 25 °C, 10 mM Zn <sup>2+</sup> -8                         | 2.56±0.03   | 11.5±0.3             | 23.3±0.4             | 260±8                  | 1100±10                |
| k <sub>uncat</sub> / 10 <sup>-5</sup> s <sup>-1</sup> , pH 7.5, 25 °C <sup>a</sup>                    | 0.618       | 1.40                 | 1.92                 | 10.4                   |                        |
| k / 10 <sup>-3</sup> s <sup>-1</sup> , pH 7.5, 25 °C <sup>a</sup> 10 mM Zn <sup>2+</sup> -8           | 0.095±0.003 | 0.45±0.01            | 1.39±0.04            | 10.3±0.1               |                        |

<sup>a</sup> From. ref. 7. <sup>b</sup> From. ref. 6.

## Synthesis and characterization of phosphodiester substrates and ligands.

**General procedures.** The NMR spectra were recorded on a Bruker AV 500 or 400 spectrometer. The mass spectra were acquired using either a Bruker micrOTOF-Q ESI-MS spectrometer or Perkin-Elmer Sciex API 365 triple quadrupole spectrometer. Ethanol, dichloromethane and acetonitrile were dried by storage over molecular sieves. A semipreparative column ODS Hypersil RP-18, 250×10 mm, 5 µm was used for HPLC purification of the synthesis products. Commercially available bipyridine (Acros), terpyridine (ABCR), 1,4,7-triazacyclononane (TCI), 1,4,7-triazacyclononane trihydrobromide (Aldrich) 1,5,9-triazacyclododecane (TCI) and 1,5,9-triazacyclododecane trihydrobromide (Aldrich) were used as received. The synthesis of alkyl esters 4b-4h and phenyl ester 3a has been reported before.<sup>8</sup> Uridine 3'-phosphoesters 3b-3e and 4a, methyl phosphonate 7b as well as ligands 17 a, 17b, 19b, 21b and 22 were synthesized in the present work using known methods as described below. <sup>1</sup>H NMR spectra for the purified products are attached at the end of the document.

**Synthesis of uridine 3'-neopentyl phosphate (4a).** 4a was synthesized by the common phosphoramidite method from commercially available 5'-*O*-dimethoxytrityl-2'-*O*-triisopropylsilyloxymethyluridine- 3'-[(2-cyanoethyl)-(N,N-diisopropyl)]-phosphoramidite and neopentanol using a previously described method.<sup>8</sup> <sup>1</sup>H NMR δ<sub>H</sub> (500 MHz, CD<sub>3</sub>OD): 8,07 (1H, d, J=8,0 Hz, H6), 5,97 (1H, d, J=5,0 Hz, H1'), 5,75 (1H, d, J=8,0 Hz, H5), 4,59 (1H, m, H3') 4,33 (1H, t, J=5,0 Hz, H2'), 4,26 (1H, m, H4'), 3,85 (2H, s, CH<sub>2</sub>), 3,61 (2H, m, H5',H5''), 0,965 (9H, s, 3×CH<sub>3</sub>). <sup>31</sup>P NMR (202 MHz, D<sub>2</sub>O): 4,20. ESI- MS: m/z 393,1158 [M-H]<sup>-</sup>

**Synthesis of uridine 3'-methylphosphonate (7b).** 7b was synthesized as described previously by Mäki *et al.*<sup>9</sup> After coupling of 2',5'-di-*O*-(*tert*-butyldimethylsilyl)uridine<sup>10-12</sup> (0,50 g, 1 mmol) and methylphosphorylbis(1,2,4-triazole),<sup>13</sup> obtaining 2',5'-di-*O*-(*tert*-butyldimethylsilyl)uridine-3'-methylphosphonate, the *tert*-butyldimethylsilyl protecting groups were removed with 0,5 M tetrabutylammoniumfluoride in tetrahydrofuran. The crude product was purified by RP HPLC on a semipreparative column, eluting with a mixture of water and acetonitrile. Finally, the product was treated

with cation exchange resin (AG 50W-X2). Yield 0,078 g (24 %).  $^1\text{H}$  NMR  $\delta_{\text{H}}$  (500 MHz,  $\text{D}_2\text{O}$ ): 7,80 (1H, d,  $J=8,3$  Hz, H6), 5,88 (1H, d,  $J=5,1$  Hz, H1'), 5,83 (1H, d,  $J=8,0$  Hz, H5), 4,55 (1H, m, H3'), 4,37 (1H, t,  $J=5,1$  Hz, H2'), 4,20 (1H, d,  $J=2,9$  Hz, H4'), 3,83 (1H, dd,  $J=2,9$  Hz,  $J=12,8$  Hz, H5'), 3,75 (1H, dd,  $J=4,2$  Hz,  $J=12,8$  Hz, H5'), 1,31 (3H, d,  $J=16,9$  Hz,  $\text{P-CH}_3$ ).  $^{31}\text{P}$  NMR (202 MHz,  $\text{D}_2\text{O}$ ): 28,37. ESI<sup>-</sup>-MS:  $m/z$  321,30 [M-H]<sup>-</sup>

*Synthesis of uridine 3'-aryl phosphates 3b-3e.* The 5'-O-(4-monomethoxytrityl)-2'-O-(tetrahydropyran-2-yl)-uridine 3'-arylphosphates were synthesized from 5'-O-(4-monomethoxytrityl)-2'-O-(tetrahydropyran-2-yl)-uridine and commercially available substituted phenyl phosphorodichloridate as described previously.<sup>5-7</sup> The acid labile monomethoxytrityl and tetrahydropyranyl protecting groups were removed with a mixture of acetonitrile and 0.2 M aqueous hydrogen chloride (1:1) at room temperature (25).<sup>6</sup> After 30-45 min the pH of the solution was adjusted to 4.7 with aqueous sodium acetate. After extraction with dichloromethane, the aqueous phase was evaporated to dryness. The product was purified by RP HPLC on a semipreparative column. A mixture of acetonitrile and water was used as an eluent; 10 min isocratic elution with 3 % acetonitrile, then 30 min linear gradient to 50 % acetonitrile. The purified products were lyophilized and characterized by  $^1\text{H}$ ,  $^{31}\text{P}$  and MS spectroscopy.

Uridine 3'-(4-chlorophenyl) phosphate (3b):  $^1\text{H}$  NMR  $\delta_{\text{H}}$  (500 MHz,  $\text{CD}_3\text{OD}$ ): 8,05 (1H, d,  $J=8,1$  Hz, H6), 7,29 (2H, d,  $J=9,3$  Hz, PhCl), 7,26 (2H, d,  $J=9,1$  Hz, PhCl), 5,97 (1H, d,  $J=5,3$  Hz, H1'), 5,72 (1H, d,  $J=8,1$  Hz, H5), 4,71 (1H, m, H3'), 4,33 (1H, t,  $J=5,3$  Hz, H2'), 4,24 (1H, d,  $J=3,6$  Hz, H4'), 3,81 (1H, dd,  $J=2,4$  Hz,  $J=12,4$  Hz, H5'), 3,75 (1H, dd,  $J=2,6$  Hz,  $J=12,2$  Hz, H5').  $^{31}\text{P}$  NMR (202 MHz,  $\text{CD}_3\text{OD}$ ): -5,09. ESI<sup>-</sup>-MS:  $m/z$  433,04 [M-H]<sup>-</sup>

Uridine 3'-(2-chlorophenyl) phosphate (3c):  $^1\text{H}$  NMR  $\delta_{\text{H}}$  (500 MHz,  $\text{CD}_3\text{OD}$ ): 8,09 (1H, d,  $J=8,3$  Hz, H6), 7,62 (1H, d,  $J=8,2$  Hz, PhCl), 7,39 (1H, d,  $J=7,9$  Hz, PhCl), 7,26 (1H, m, PhCl), 7,06 (1H, t,  $J=7,6$  Hz, PhCl), 5,97 (1H, d,  $J=5,1$  Hz, H1'), 5,72 (1H, d,  $J=8,3$  Hz, H5), 4,79 (1H, m, H3'), 4,36 (1H, t,  $J=4,7$  Hz, H2'), 4,29 (1H, m, H4'), 3,82 (2H, m, H5' ja H5').  $^{31}\text{P}$  NMR (202 MHz,  $\text{CD}_3\text{OD}$ ): -5,27. ESI<sup>-</sup>-MS:  $m/z$  433,05 [M-H]<sup>-</sup>

Uridine 3'-(2,5-dichlorophenyl) phosphate (3d):  $^1\text{H}$  NMR  $\delta_{\text{H}}$  (500 MHz,  $\text{CD}_3\text{OD}$ ): 8,08 (1H, d,  $J=8,0$  Hz, H6), 7,74 (1H, d,  $J=1,9$  Hz,  $\text{PhCl}_2$ ), 7,38 (1H, d,  $J=8,5$  Hz,  $\text{PhCl}_2$ ), 7,08 (1H, dd,  $J=2,2$  Hz,  $J=8,45$ ,  $\text{PhCl}_2$ ), 5,98 (1H, d,  $J=5,4$  Hz, H1'), 5,72 (1H, d,  $J=8,3$  Hz), 4,78 (1H, m, H3'), 4,36 (1H, t,  $J=4,9$  Hz, H2'), 4,31 (1H, m, H4'), 3,83 (2H, m, H5' ja H5').  $^{31}\text{P}$  NMR (202 MHz,  $\text{CD}_3\text{OD}$ ): -5,59. ESI<sup>-</sup>-MS:  $m/z$  467,02 [M-H]<sup>-</sup>

Uridine 3'-(4-nitrophenyl) phosphate (3e):  $^1\text{H}$  NMR  $\delta_{\text{H}}$  (500 MHz,  $\text{CD}_3\text{OD}$ ): 8,25 (2H, d,  $J=9,4$  Hz,  $\text{NO}_2\text{Ph}$ ), 8,04 (1H, d,  $J=7,9$  Hz, H6), 7,49 (2H, d,  $J=9,1$  Hz,  $\text{NO}_2\text{Ph}$ ), 5,99 (1H, d,  $J=6,1$  Hz, H1'), 5,73 (1H, d,  $J=8,3$  Hz, H5), 4,79 (1H, m, H3'), 4,38 (1H, t,  $J=4,9$  Hz, H2'), 4,27 (1H, d,  $J=3,0$  Hz, H4'), 3,82 (1H, dd,  $J=2,5$  Hz,  $J=12,4$  Hz, H5'), 3,76 (1H, dd,  $J=2,6$  Hz,  $J=12,4$  Hz, H5').  $^{31}\text{P}$  NMR (202 MHz,  $\text{CD}_3\text{OD}$ ): -6,14. ESI<sup>-</sup>-MS:  $m/z$  444,04 [M-H]<sup>-</sup>

*Synthesis of N,N,N',N'-tetrakis(2-pyridylmethyl)-2-hydroxy-1,3-propanediamine (19b):* A mixture of picolyl chloride hydrochloride (0,607 g, 3,64 mmol), 1,3-diamino-2-propanol (82 mg, 0,91 mmol) and potassium carbonate (1,75 g, 13 mmol) in 30 ml of acetonitrile was refluxed smoothly 48 hours with magnetic stirring. The reaction mixture was evaporated to dryness. The residue was dissolved with water and extracted with dichloromethane. The organic phase was dried with  $\text{Na}_2\text{SO}_4$  and evaporated to dryness. The crude product was purified by silica gel chromatography using a stepwise gradient of methanol (5-20 %) in dichloromethane. The pure product was obtained as brown oil. Yield 0,1159 g (28 %)  $^1\text{H}$  NMR  $\delta_{\text{H}}$  (500 MHz,  $\text{CD}_3\text{OD}$ ): 8,43 (d, 4H,  $J=4,5$  Hz), 7,77 (t, 4H,  $J=7,5$  Hz), 7,52 (d, 4H,  $J=7,5$  Hz), 7,28 (d, 4H,  $J=4,5$  Hz), 3,98 (m, 1H), 3,83 (d, 8H), 2,64 (dd, 2H,  $J=13,5$  Hz,  $J=4,0$  Hz), 2,53 (dd, 2H,  $J=13,5$  Hz,  $J=7,5$ ). ESI<sup>+</sup>-MS:  $m/z$  455,2389 [M+H]<sup>+</sup>.

*Synthesis of N,N,N',N'-tetrakis(4-imidazolymethyl)-2-hydroxy-1,3-propanediamine (22):*<sup>14</sup> 4-hydroxymethylimidazole hydrochloride was first converted to 4-chloromethylimidazole hydrochloride.<sup>15</sup> 1,3-diamino-2-propanol (0,135 g, 1,5 mmol) was dissolved in dry ethanol. Triethylamine (5 mL) was added and the reaction mixture was heated at reflux. 4-chloromethylimidazole hydrochloride was dissolved in dry ethanol and added dropwise to the reaction mixture. After 3.5 h reflux, reaction mixture was evaporated to dryness. The residue was dissolved with 30 mL of dry dichloromethane and stirred for 1.5 h. Organic phase was filtered at atmospheric pressure and evaporated to dryness. The remaining triethylammonium salt was removed by treating the crude product with anion exchange resin (DOWEX 1-X8). Yield 0,311 g (50 %). <sup>1</sup>H NMR  $\delta_{\text{H}}$  (500 MHz, D<sub>2</sub>O): 7,64 (s, 2H), 7,61 (s, 2H), 7,01 (s, 2H), 6,95 (s, 2H), 3,76 (m, 1H), 3,61 (s, 4H), 3,57 (s, 4H), 2,53 (d, 2H, *J*=6 Hz), 2,32 (d, 2H, *J*=6 Hz). <sup>13</sup>C NMR (500 MHz, D<sub>2</sub>O): 135,9; 132,96; 118,48; 65,69; 56,44; 49,76. ESI<sup>+</sup>-MS: *m/z* 411,2577 [M+H]<sup>+</sup>

*Synthesis of 1,3-Bis(1,4,7-triazacyclonon-1-yl)-2-hydroxypropane (17a):* The ligand was synthesized as described previously by Iranzo *et al.*<sup>16</sup> <sup>1</sup>H NMR  $\delta_{\text{H}}$  (500 MHz, CDCl<sub>3</sub>): 4,17 (tt, 1H, *J*=9,5 Hz, *J* = 2,5 Hz), 3,59-3,52 (m, 8H), 3,25 (t, 8H, *J*=5,8 Hz), 3,09-3,04 (m, 4H), 2,99-2,94 (m, 4H), 2,70 (dd, 2H, *J*=14 Hz, *J*=2,5 Hz), 2,59 (dd, 2H, *J*=9,8 Hz, *J*=14,3 Hz). ESI<sup>+</sup>-MS: *m/z* 315,34 [M+H]<sup>+</sup>

*Synthesis of 1,3-Bis(1,4,7-triazacyclonon-1-yl)-propane (17b):* The ligand was synthesized as described previously by Saito *et al.*<sup>17</sup> In order to remove the HBr salt, the ligand (42 mg) was mixed with 4 M NaOH solution (15 ml) and the mixture was stirred 2 h at room temperature. The water solution was extracted with chloroform (4×20 ml). The organic phase was dried with Na<sub>2</sub>SO<sub>4</sub> and evaporated to dryness. <sup>1</sup>H NMR  $\delta_{\text{H}}$  (500 MHz, D<sub>2</sub>O): 3,49 (s, 8H), 3,24 (t, 8H, *J*=6 Hz), 2,97 (t, 8H, *J*=6 Hz), 2,67 (t, 4H, *J*=8 Hz), 1,77 (m, 2H). <sup>13</sup>C NMR (500 MHz, D<sub>2</sub>O): 68,15; 52,09; 47,15; 43,31; 41,89. ESI<sup>+</sup>-MS: *m/z* 299,2923 [M+H]<sup>+</sup>.

*Synthesis of 1,3-Bis(1,5,9-triazacyclododec-1-yl)-2-hydroxypropane (21b):* The ligand was synthesized as described previously by Mohamed *et al.*<sup>18</sup> <sup>1</sup>H NMR  $\delta_{\text{H}}$  (500 MHz, CD<sub>3</sub>OD): 4,11 (m, 1H), 2,91-2,76 (m, 21H), 2,56 (dd, 2H, *J*=13 Hz *J*=9,5 Hz), 2,47 (dt, 4H, *J*=13 Hz *J*=4,5 Hz), 2,14 (dd, 2H, *J*=13 Hz *J*=2,8 Hz), 1,88 (m, 2H), 1,72 (m, 9H). ESI<sup>+</sup>-MS: *m/z* 399,3817 [M+H]<sup>+</sup>

## References

- 1 M. Kosonen, E.Yousefi-Salakdeh, R.Strömberg and H. Lönnberg, *J. Chem. Soc., Trans. 2*, 1998, 1589-1595.
- 2 E.P. Serjeant and P. Dempsey, *Ionization constants of organic acids in aqueous solutions. IUPAC Chemical data series 23*. Pergamon Press, Oxford, 1979
- 3 H.S. Harned and B.B. Owen, *The physical chemistry of electrolytic solutions*. Chapman and Hall Ltd., London, 1958
- 4 Y.C. Wu, P.A. Berezensky, P.A. Feng and W.F. Koch, *Anal. Chem.*, 1993, 65, 1084-1087.
- 5 M. Kosonen, E. Yousefi-Salakdeh, R. Strömberg and H. Lönnberg, *J. Chem. Soc., Perkin Trans. 2*, 1997, 2661-2666
- 6 S. Mikkola, E. Stenman, K. Nurmi, E. Yousefi-Salakdeh, R. Strömberg and H. Lönnberg, *J. Chem. Soc., Perkin Trans.*, 1999, 1619-1625
- 7 A. M. Davis, A.D. Hall and A. Williams, *J. Am. Chem. Soc.*, 1998, 110, 5105-5108.
- 8 H. Korhonen, S. Mikkola and N.H. Williams, *Eur. J. Chem.*, 2012, 18, 659-670.
- 9 E. Mäki, M. Oivanen, P. Poijärvi and H. Lönnberg, *J. Chem. Soc., Perkin Trans. 2*, 1999, 2493-2499.

- 10 G.H. Hakimelahi, Z.A. Proba and K.K. Ogilvie, *Can. J. Chem.*, 1982, 60, 1106-1113.
- 11 K.K. Ogilvie, S.L. Beaucage, A.L. Schiffman, N.Y. Theriault and K.L. Sadana, *Can. J. Chem.* 1978, 56, 2768-2780.
- 12 K.K. Ogilvie, A.L. Schiffman and C.L. Penney, *Can. J. Chem.*, 1979, 57, 2230-2238.
- 13 A. Kraszewski and J. Stawinski, *Tetrahedron Lett.*, 1980, 21, 2935-2936.
- 14 B. Wilson, L. Gude, M. Fernández, A. Lorente and K.B. Grant, *Inorg. Chem.*, 2005, 44, 6159-6173.
- 15 R. Turner, *J. Am. Chem. Soc.*, 1949, 71, 3476-3478.
- 16 O. Iranzo, T. Elmer, J.P. Richard and J.R. Morrow, *Inorg. Chem.*, 2003, 42, 7737-7746.
- 17 K. Saito, S. Pant and M.T.V. Hearn, *J. Appl. Polym. Sci.*, 2011, 122, 2174-2180.
- 18 M.F. Mohamed, A.A. Neverov and R.S. Brown, *Inorg. Chem.*, 2009, 48, 11425-11433.

Attachments:

- <sup>1</sup> H NMR spectrum for uridine 3'-neopentyl phosphate (4a) (pp. 7-10)
- <sup>1</sup> H NMR spectrum for uridine 3'-methylphosphonate (7b) (pp. 11-14)
- <sup>1</sup> H NMR spectrum for uridine 3'-(4-chlorophenyl) phosphate (3b) (p. 15)
- <sup>1</sup> H NMR spectrum for uridine 3'-(2-chlorophenyl) phosphate (3c) (p. 16)
- <sup>1</sup> H NMR spectrum for uridine 3'-(2,5-dichlorophenyl) phosphate (3d) (p. 17)
- <sup>1</sup> H NMR spectrum uridine 3'-(4-nitrophenyl) phosphate (3e) (p.18)
- <sup>1</sup> H NMR spectrum for N,N,N',N'-tetrakis(2-pyridylmethyl)-2-hydroxy-1,3-propanediamine (19b) (pp.19-20)
- <sup>1</sup> H NMR spectrum for N,N,N',N'-tetrakis(4-imidazolymethyl)-2-hydroxy-1,3-propanediamine (22) (pp. 21-24)
- <sup>1</sup> H NMR spectrum for 1,3-bis(1,4,7-triazacyclonon-1-yl)-2-hydroxypropane (17a) (pp. 25-28)
- <sup>1</sup> H NMR spectrum for 1,3-bis(1,4,7-triazacyclonon-1-yl)-propane (17b) (pp. 29-31)
- <sup>1</sup> H NMR spectrum for 1,3-bis(1,5,9-triazacyclododec-1-yl)-2-hydroxypropane (21b) (pp. 32-35)



Uridine 3'-neopentyl phosphate (4a)

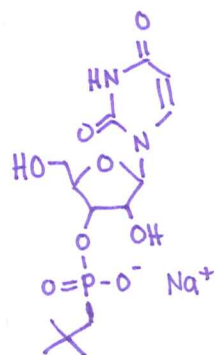

Uridine-3'-neopentylphosphate

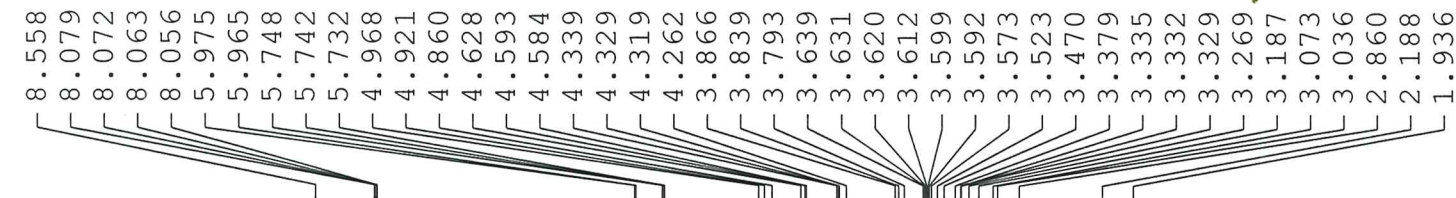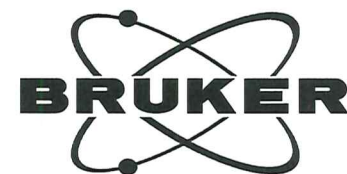

Current Data Parameters  
NAME Neo  
EXPNO 1  
PROCNO 1

F2 - Acquisition Parameters  
Date\_ 20111212  
Time 9.15  
INSTRUM AV500  
PROBHD 5 mm PABBI 1H-  
PULPROG zg30  
TD 65536  
SOLVENT MeOD  
NS 16  
DS 2  
SWH 10330.578 Hz  
FIDRES 0.157632 Hz  
AQ 3.1720407 sec  
RG 456.1  
DW 48.400 usec  
DE 6.00 usec  
TE 298.1 K  
D1 1.00000000 sec  
MCREST 0.00000000 sec  
MCWRK 0.01500000 sec

===== CHANNEL f1 =====  
NUC1 1H  
P1 6.90 usec  
PL1 1.50 dB  
SFO1 500.1330885 MHz

F2 - Processing parameters  
SI 32768  
SF 500.1300000 MHz  
WDW EM  
SSB 0  
LB 0.30 Hz  
GB 0  
PC 1.40

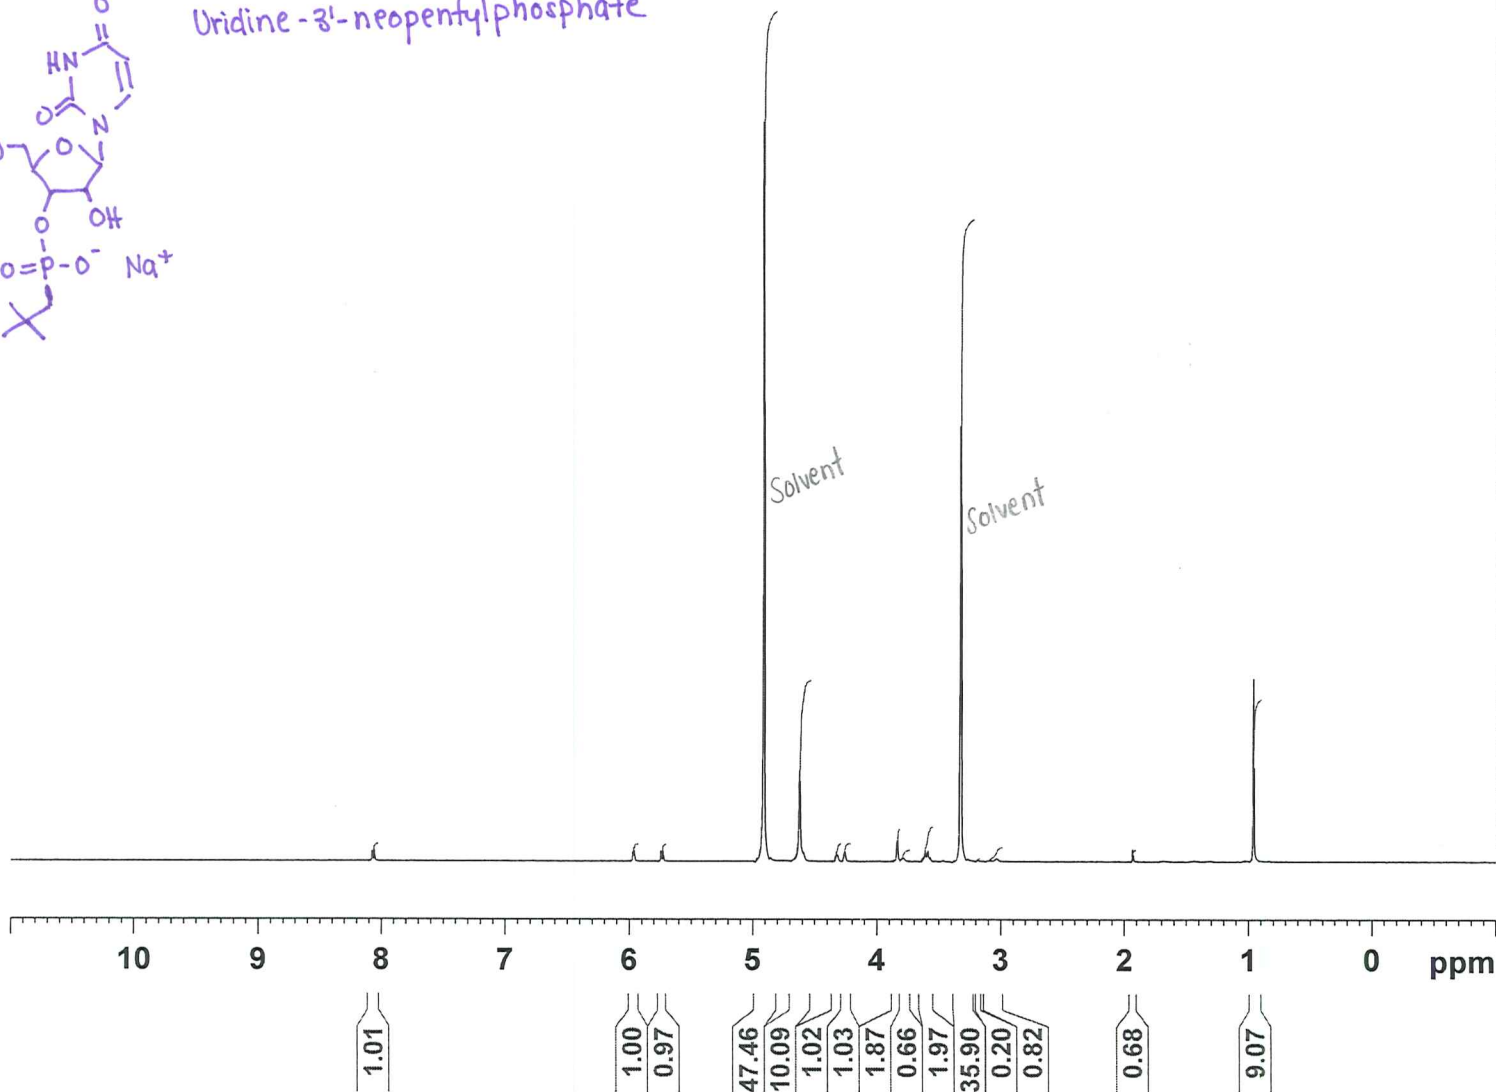

Uridine 3'-neopentyl phosphate (4a)

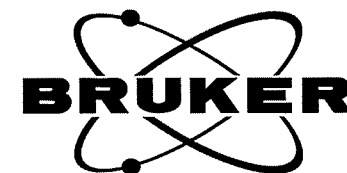

Current Data Parameters  
NAME Neo  
EXPNO 1  
PROCNO 1

F2 - Acquisition Parameters  
Date\_ 20111212  
Time 9.15  
INSTRUM AV500  
PROBHD 5 mm PABBI 1H-  
PULPROG zg30  
TD 65536  
SOLVENT MeOD  
NS 16  
DS 2  
SWH 10330.578 Hz  
FIDRES 0.157632 Hz  
AQ 3.1720407 sec  
RG 456.1  
DW 48.400 usec  
DE 6.00 usec  
TE 298.1 K  
D1 1.00000000 sec  
MCREST 0.00000000 sec  
MCWRK 0.01500000 sec

===== CHANNEL f1 =====  
NUC1 1H  
P1 6.90 usec  
PL1 1.50 dB  
SFO1 500.1330885 MHz

F2 - Processing parameters  
SI 32768  
SF 500.1300000 MHz  
WDW EM  
SSB 0  
LB 0.30 Hz  
GB 0  
PC 1.40

1.936  
1.688  
1.449  
1.434  
1.307  
1.088  
1.041  
1.026  
1.011  
0.965  
0.959  
0.903  
0.848  
0.838  
0.729

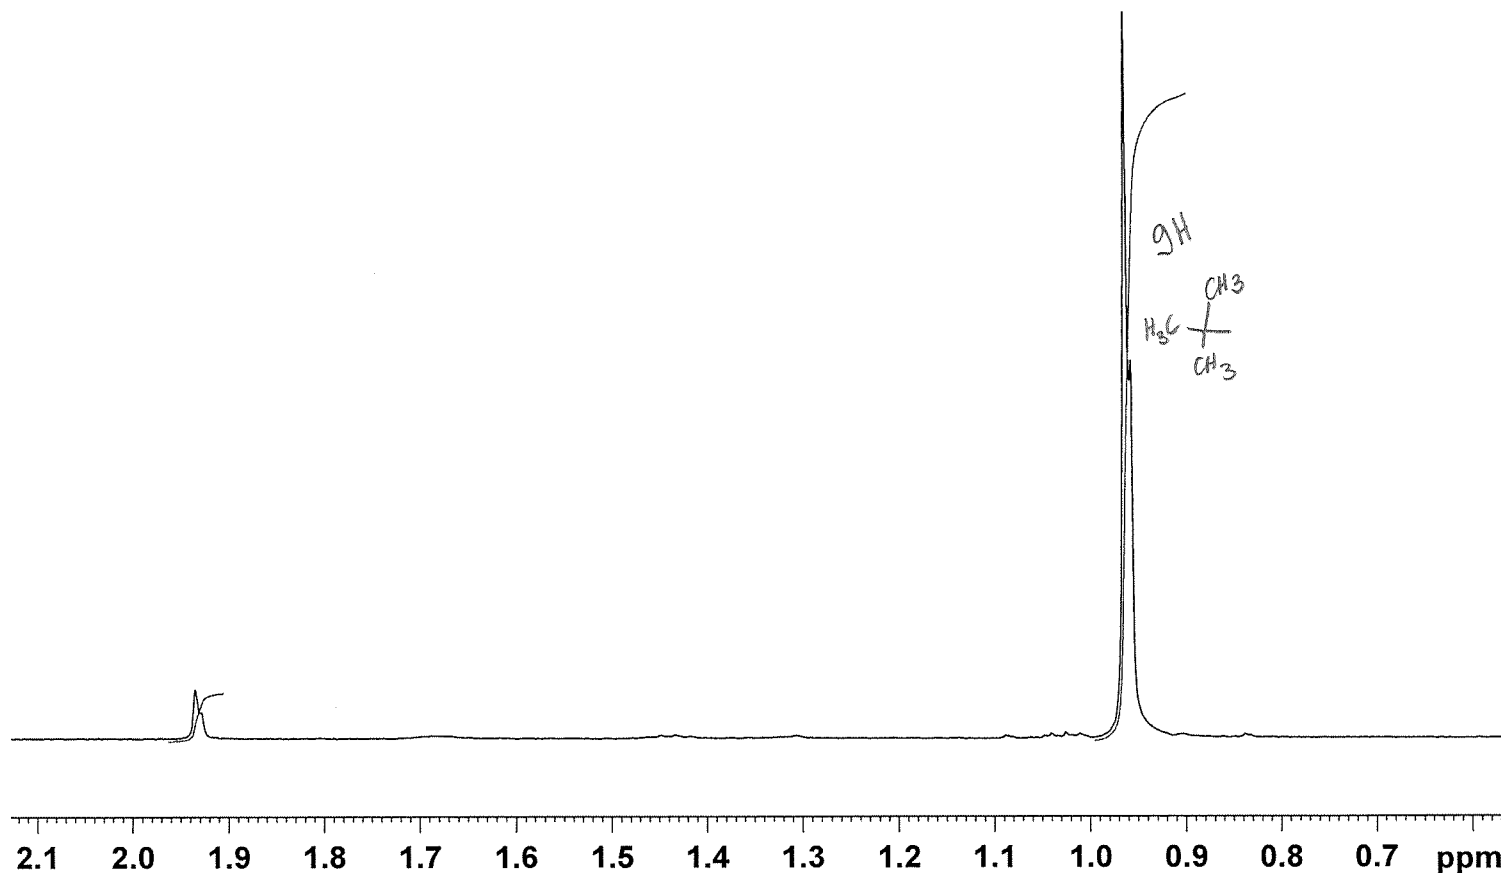

0.68

9.07



Uridine 3'-neopentyl phosphate (4a)

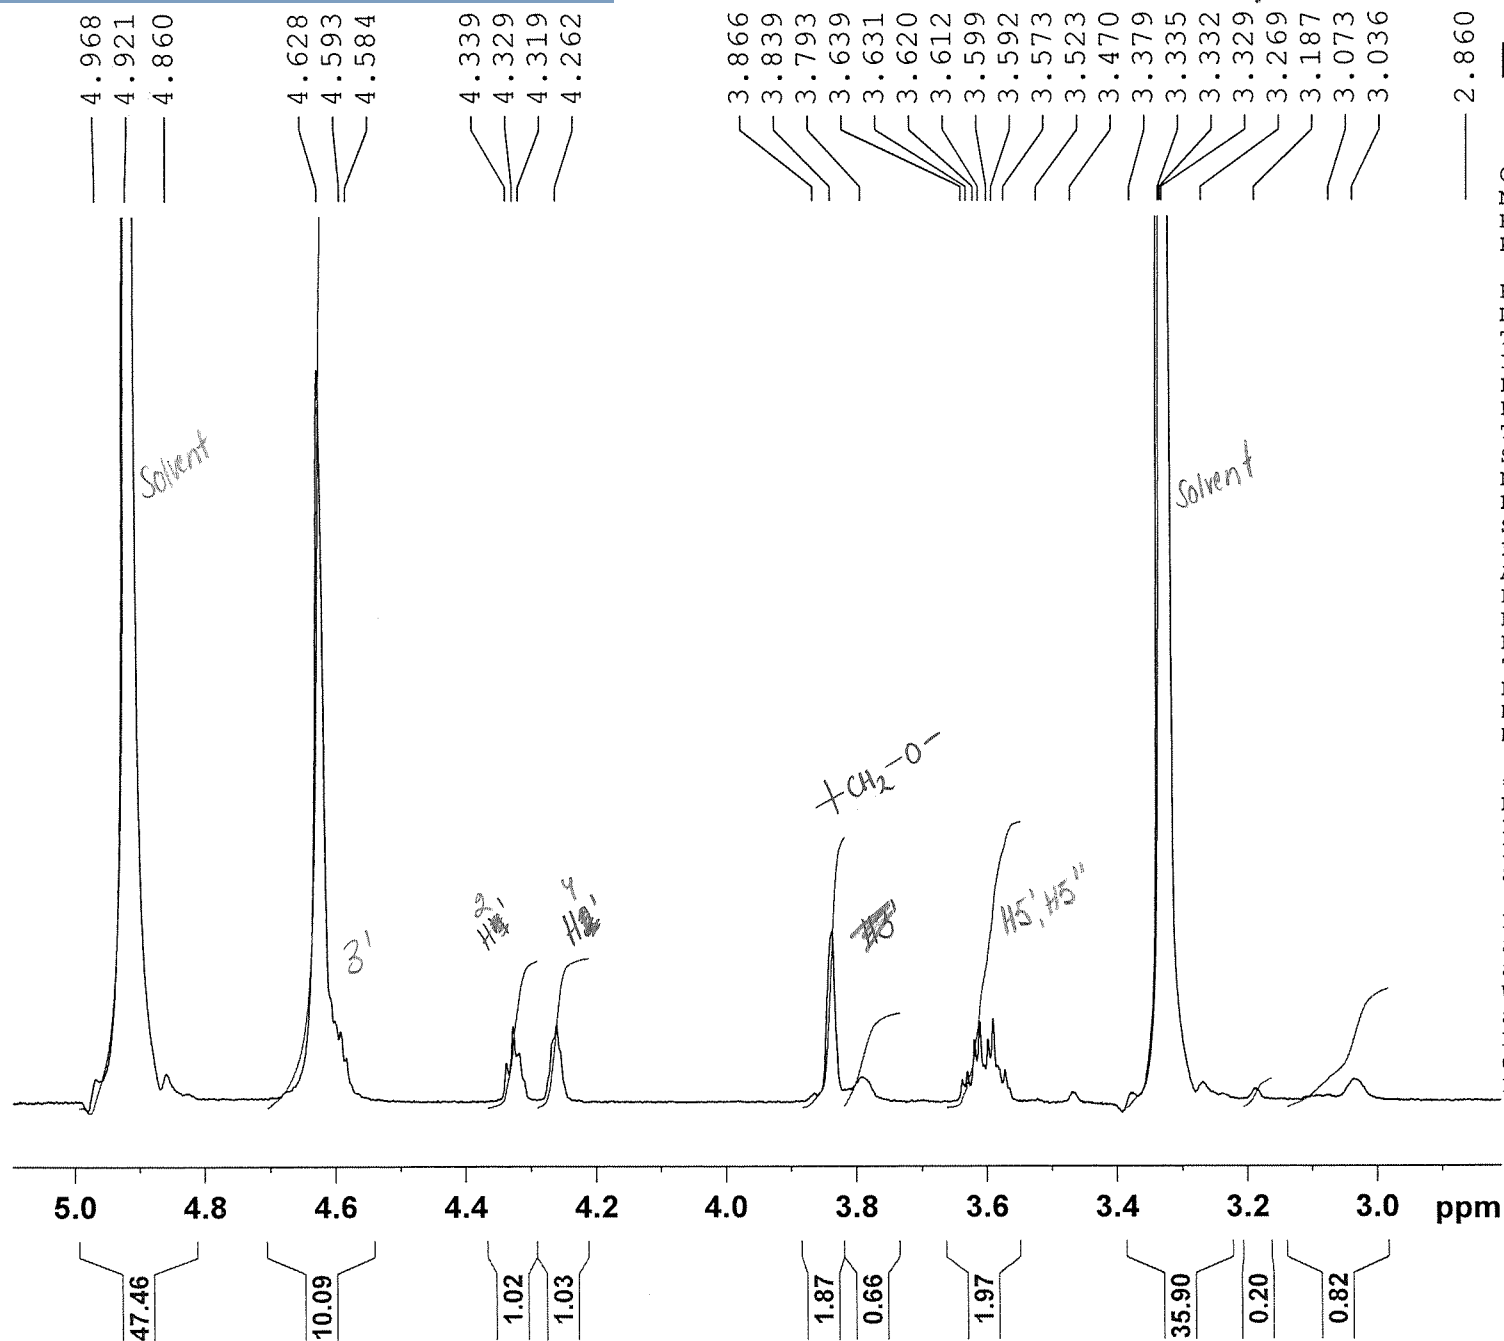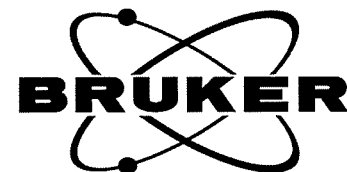

Current Data Parameters  
NAME Neo  
EXPNO 1  
PROCNO 1

F2 - Acquisition Parameters  
Date\_ 20111212  
Time\_ 9.15  
INSTRUM AV500  
PROBHD 5 mm PABBI 1H-  
PULPROG zg30  
TD 65536  
SOLVENT MeOD  
NS 16  
DS 2  
SWH 10330.578 Hz  
FIDRES 0.157632 Hz  
AQ 3.1720407 sec  
RG 456.1  
DW 48.400 usec  
DE 6.00 usec  
TE 298.1 K  
D1 1.00000000 sec  
MCREST 0.00000000 sec  
MCWRK 0.01500000 sec

===== CHANNEL f1 =====  
NUC1 1H  
P1 6.90 usec  
PL1 1.50 dB  
SFO1 500.1330885 MHz

F2 - Processing parameters  
SI 32768  
SF 500.1300000 MHz  
WDW EM  
SSB 0  
LB 0.30 Hz  
GB 0  
PC 1.40

Uridine 3'-neopentyl phosphate (4a)

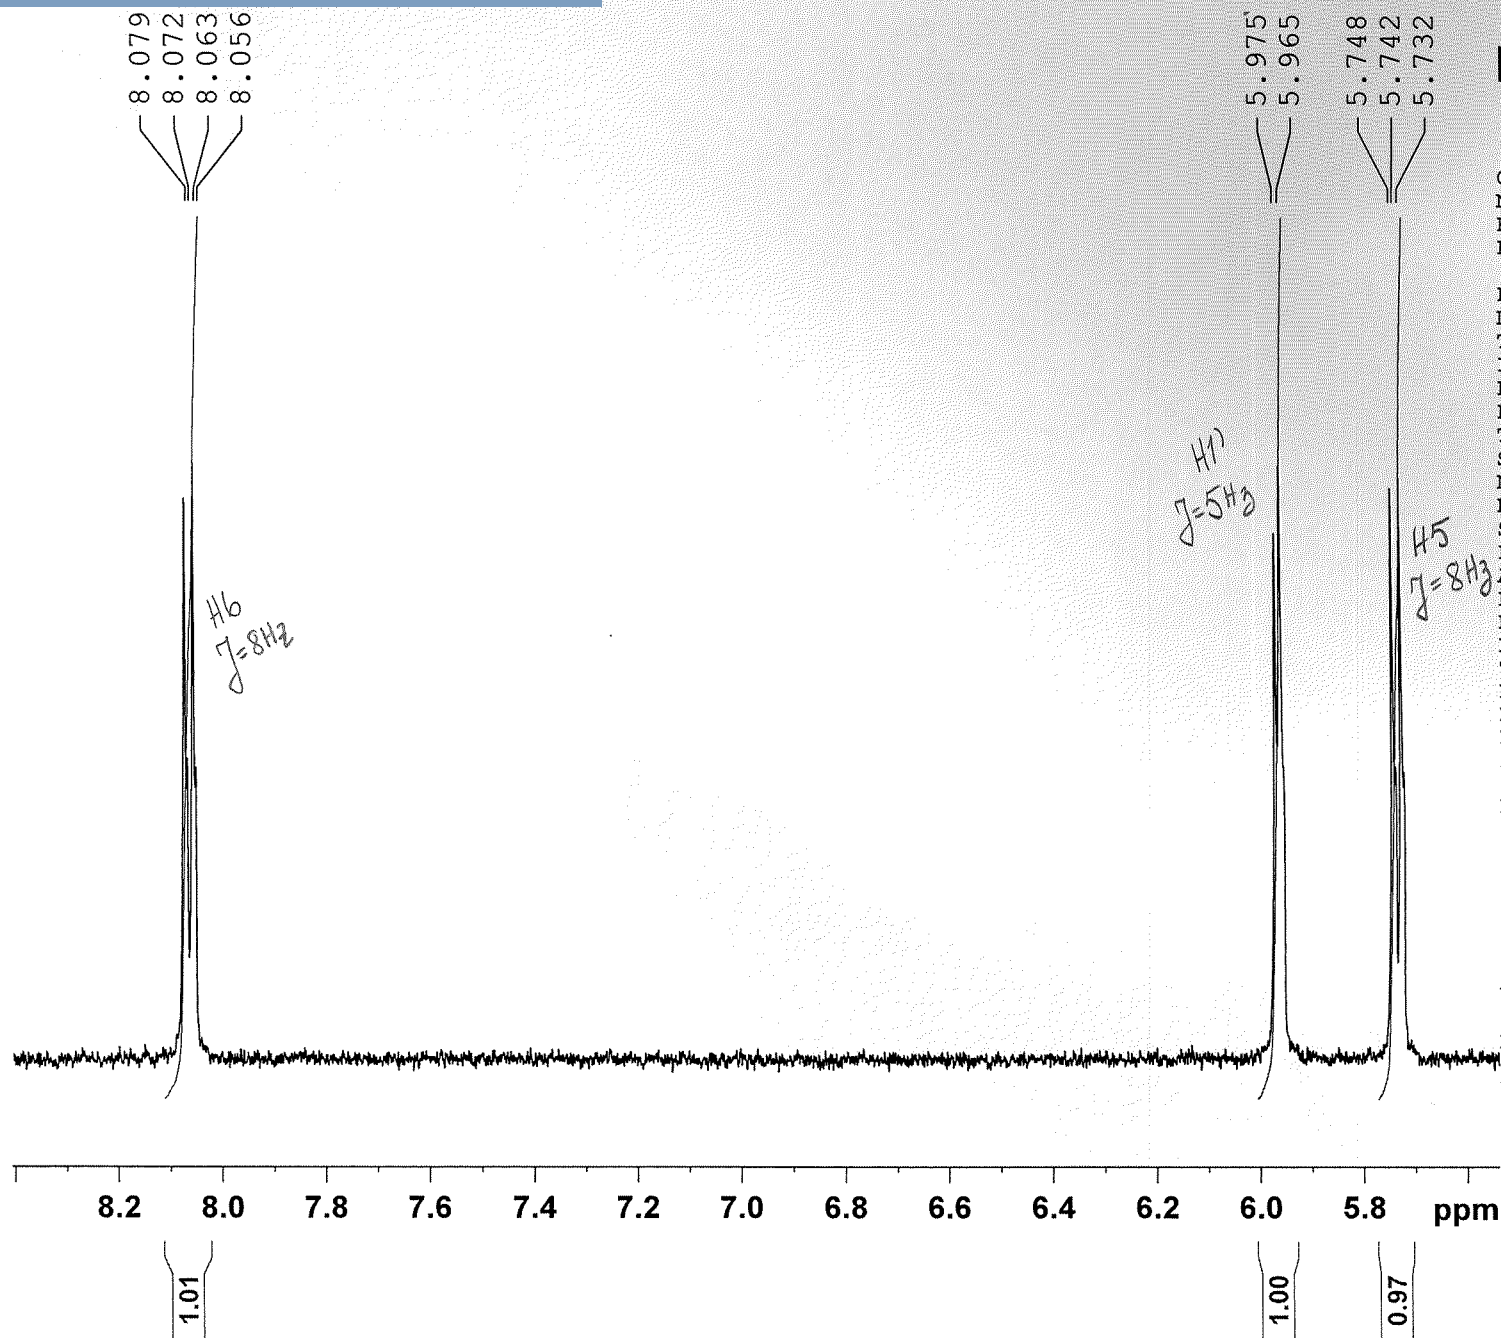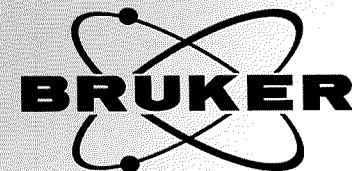

Current Data Parameters  
NAME Neo  
EXPNO 1  
PROCNO 1

F2 - Acquisition Parameters  
Date\_ 20111212  
Time 9.15  
INSTRUM AV500  
PROBHD 5 mm PABBI 1H-  
PULPROG zg30  
TD 65536  
SOLVENT MeOD  
NS 16  
DS 2  
SWH 10330.578 Hz  
FIDRES 0.157632 Hz  
AQ 3.1720407 sec  
RG 456.1  
DW 48.400 usec  
DE 6.00 usec  
TE 298.1 K  
D1 1.00000000 sec  
MCREST 0.00000000 sec  
MCWRK 0.01500000 sec

===== CHANNEL f1 =====  
NUC1 1H  
P1 6.90 usec  
PL1 1.50 dB  
SFO1 500.1330885 MHz

F2 - Processing parameters  
SI 32768  
SF 500.1300000 MHz  
WDW EM  
SSB 0  
LB 0.30 Hz  
GB 0  
PC 1.40

SpinWorks 3: no title

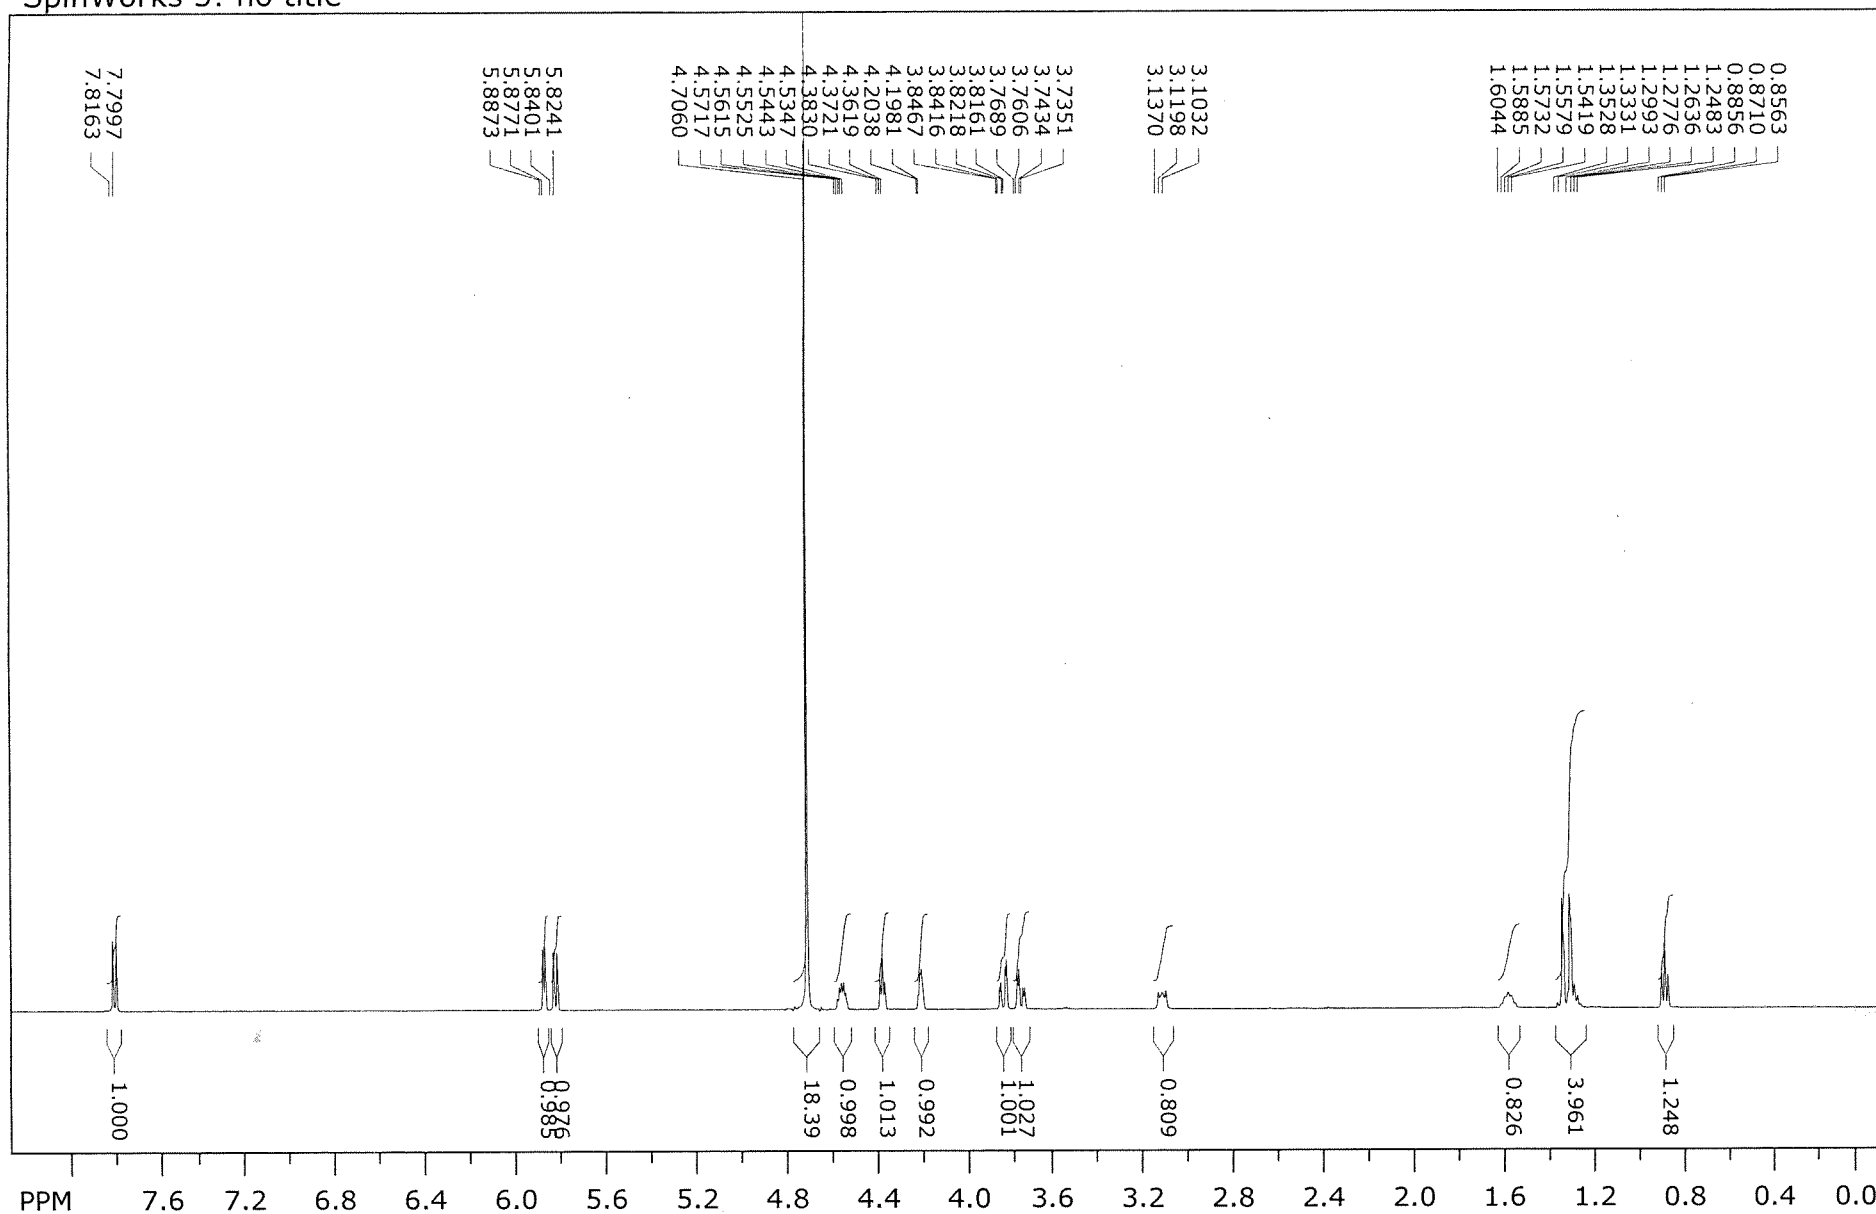

file: F:\urd-3'-Mephos\1\fid expt: <zg30>  
 transmitter freq.: 500.133089 MHz  
 time domain size: 65536 points  
 width: 10330.58 Hz = 20.6557 ppm = 0.157632 Hz/pt  
 number of scans: 16

freq. of 0 ppm: 500.130000 MHz  
 processed size: 32768 complex points  
 LB: 0.300 GF: 0.0000  
 Hz/cm: 168.193 ppm/cm: 0.33630

SpinWorks 3: no title

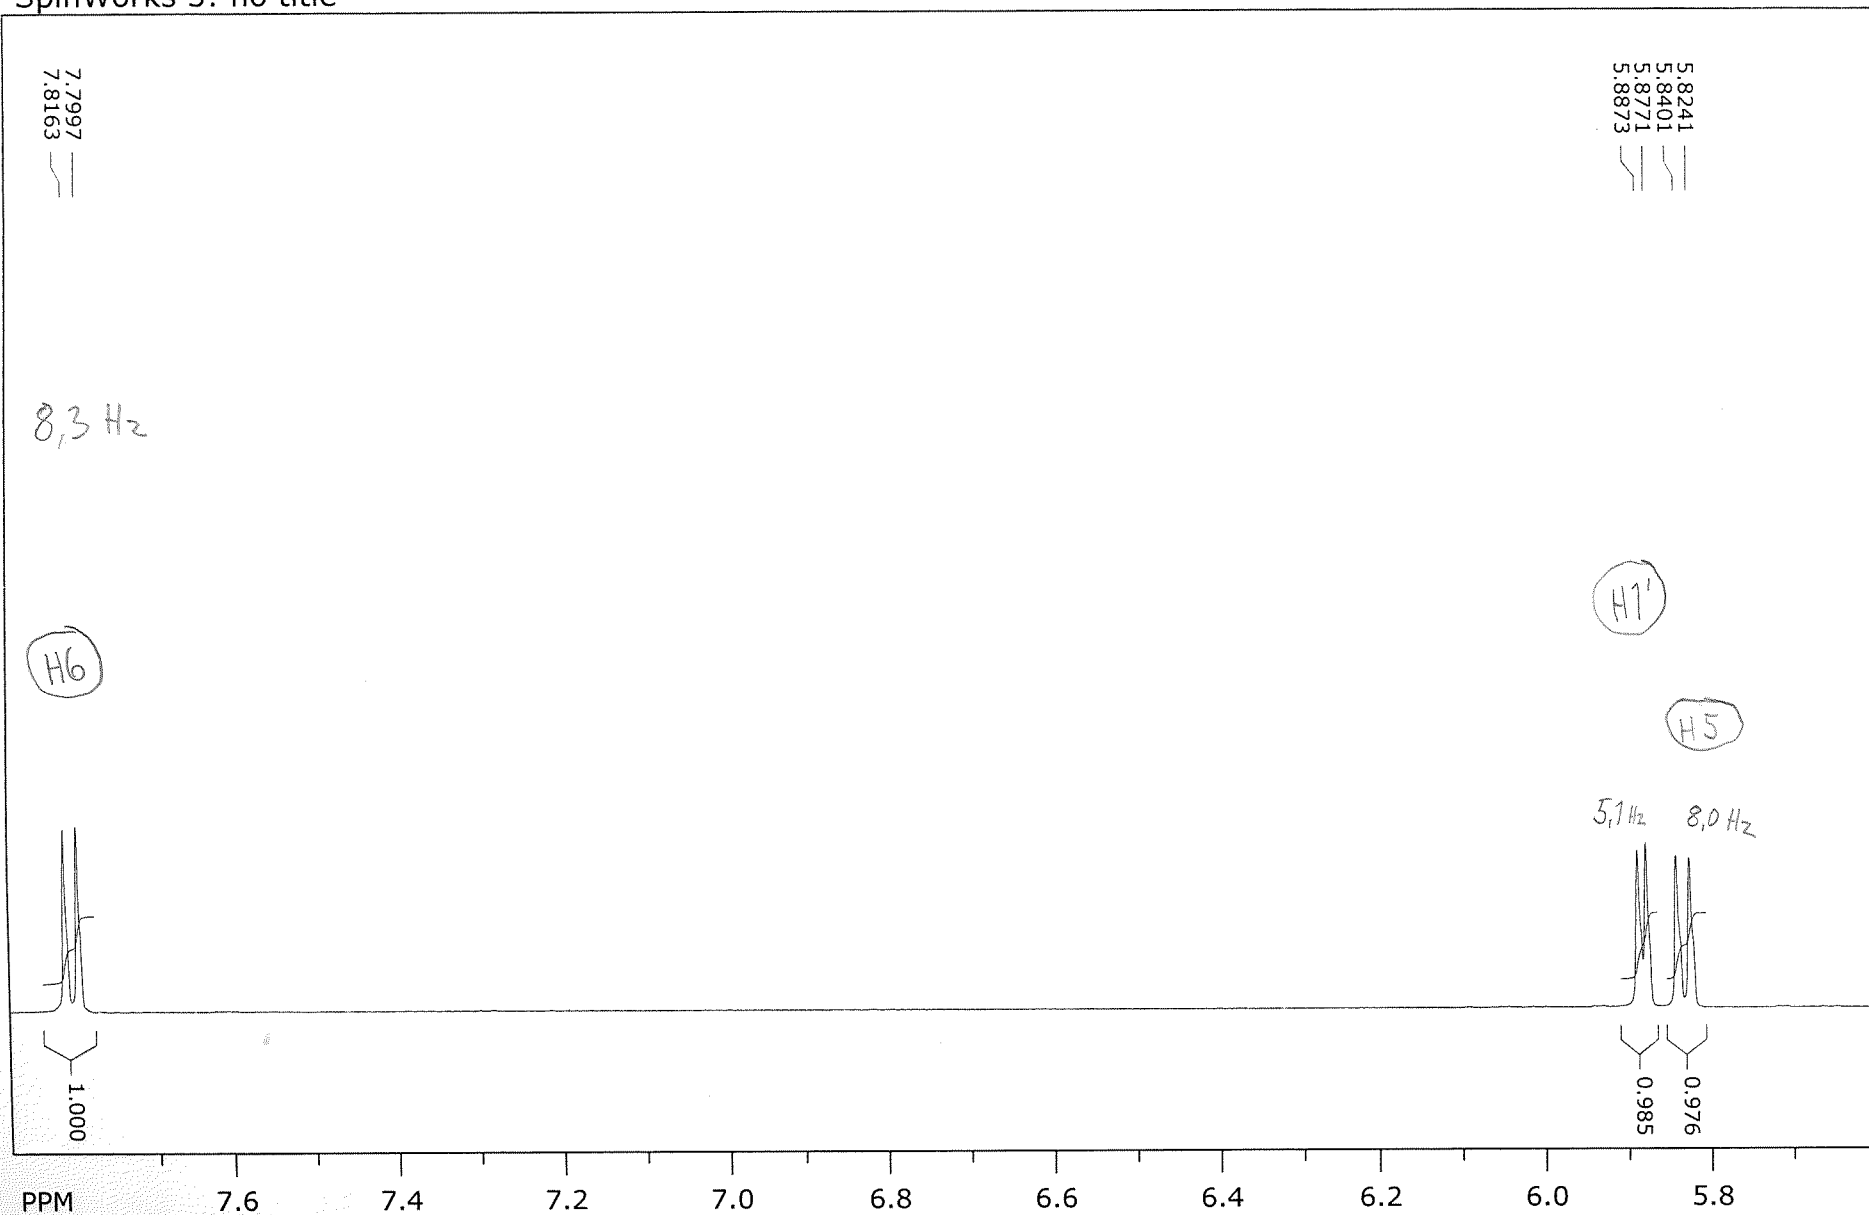

file: F:\urd-3'-Mephos\1\fid expt: <zg30>  
transmitter freq.: 500.133089 MHz  
time domain size: 65536 points  
width: 10330.58 Hz = 20.6557 ppm = 0.157632 Hz/pt  
number of scans: 16

freq. of 0 ppm: 500.130000 MHz  
processed size: 32768 complex points  
LB: 0.300 GF: 0.0000  
Hz/cm: 46.047 ppm/cm: 0.09207

SpinWorks 3: no title

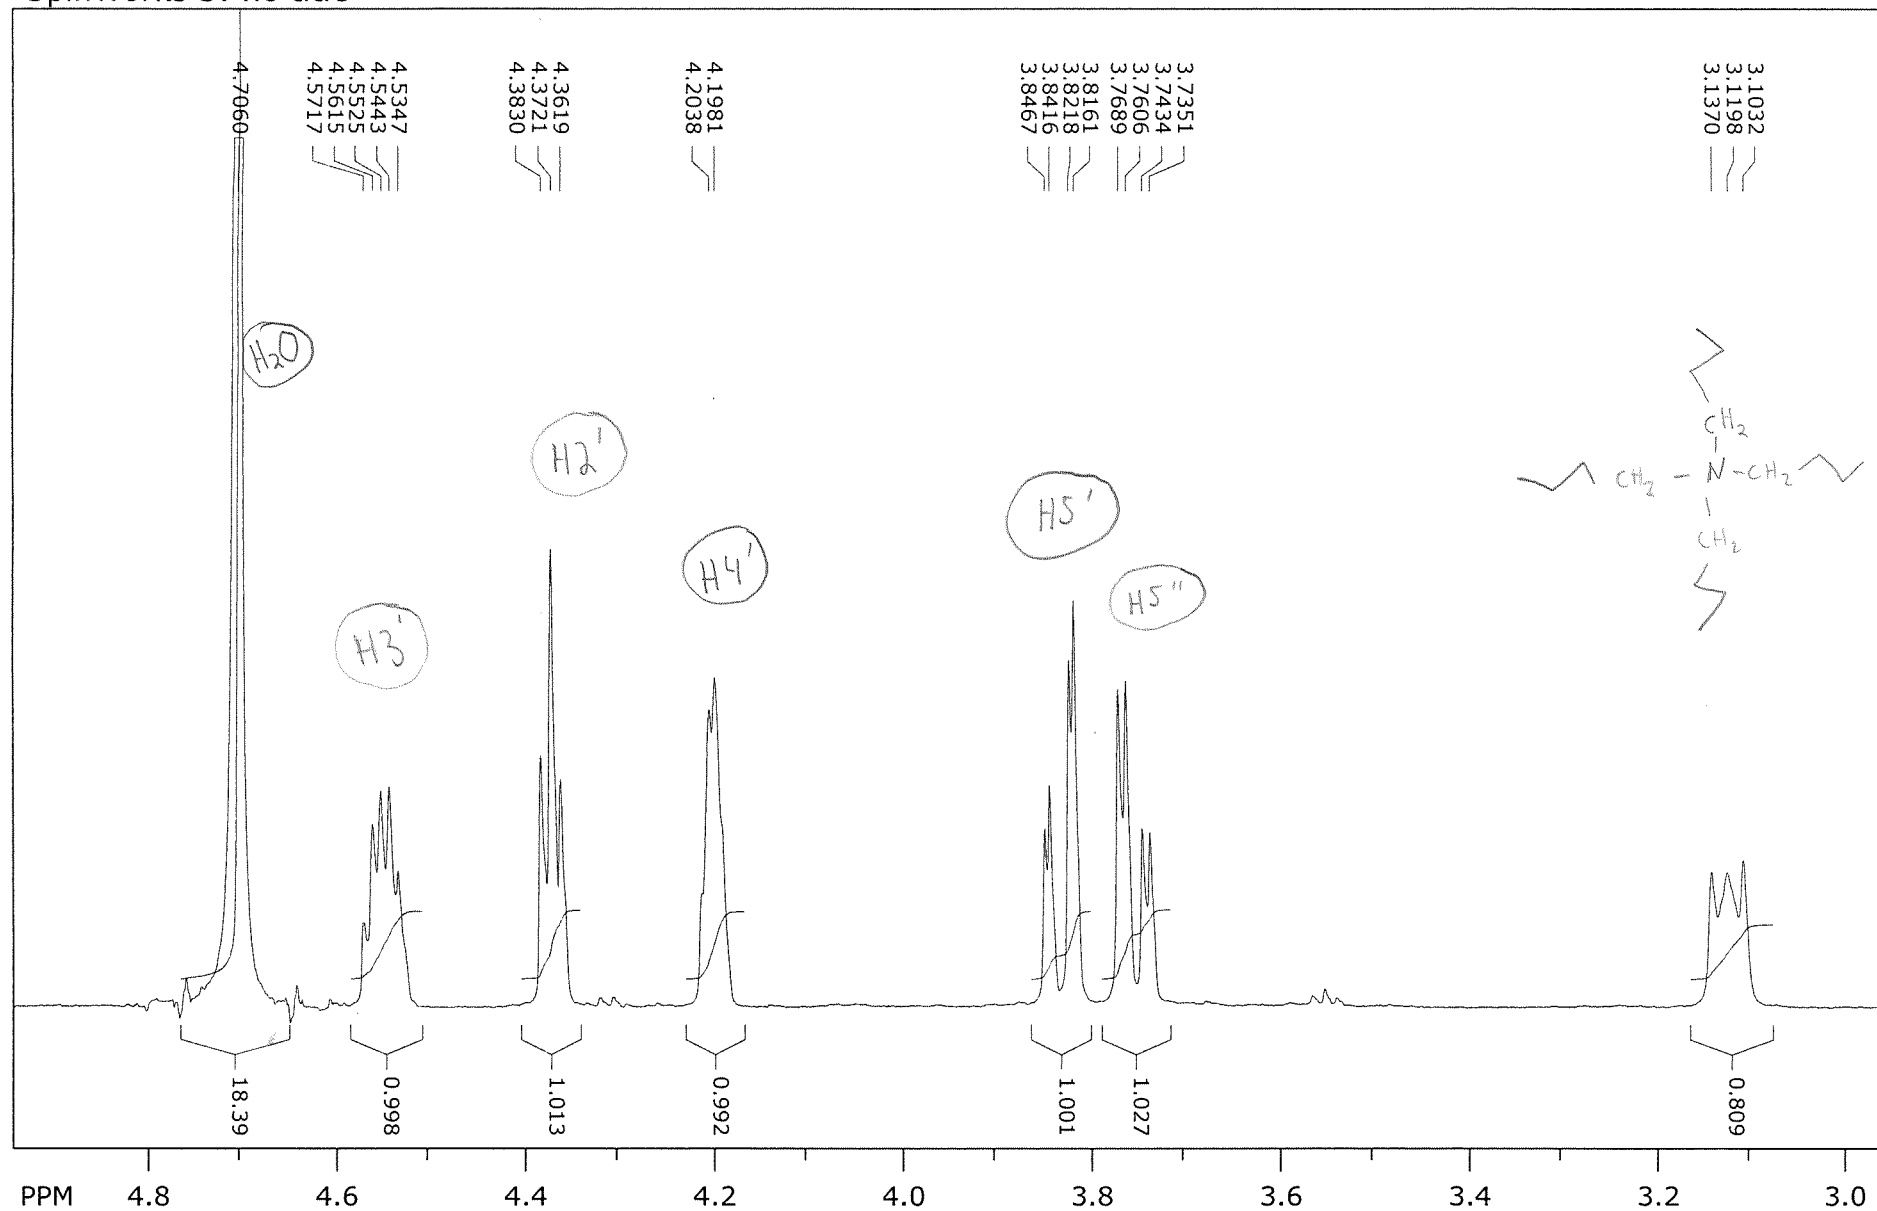

file: F:\urd-3'-Mephos\1\fid expt: <zg30>  
transmitter freq.: 500.133089 MHz  
time domain size: 65536 points  
width: 10330.58 Hz = 20.6557 ppm = 0.157632 Hz/pt  
number of scans: 16

freq. of 0 ppm: 500.130000 MHz  
processed size: 32768 complex points  
LB: 0.300 GF: 0.0000  
Hz/cm: 40.036 ppm/cm: 0.08005

Uridine 3-methylphosphonate (7b)

SpinWorks 3: no title

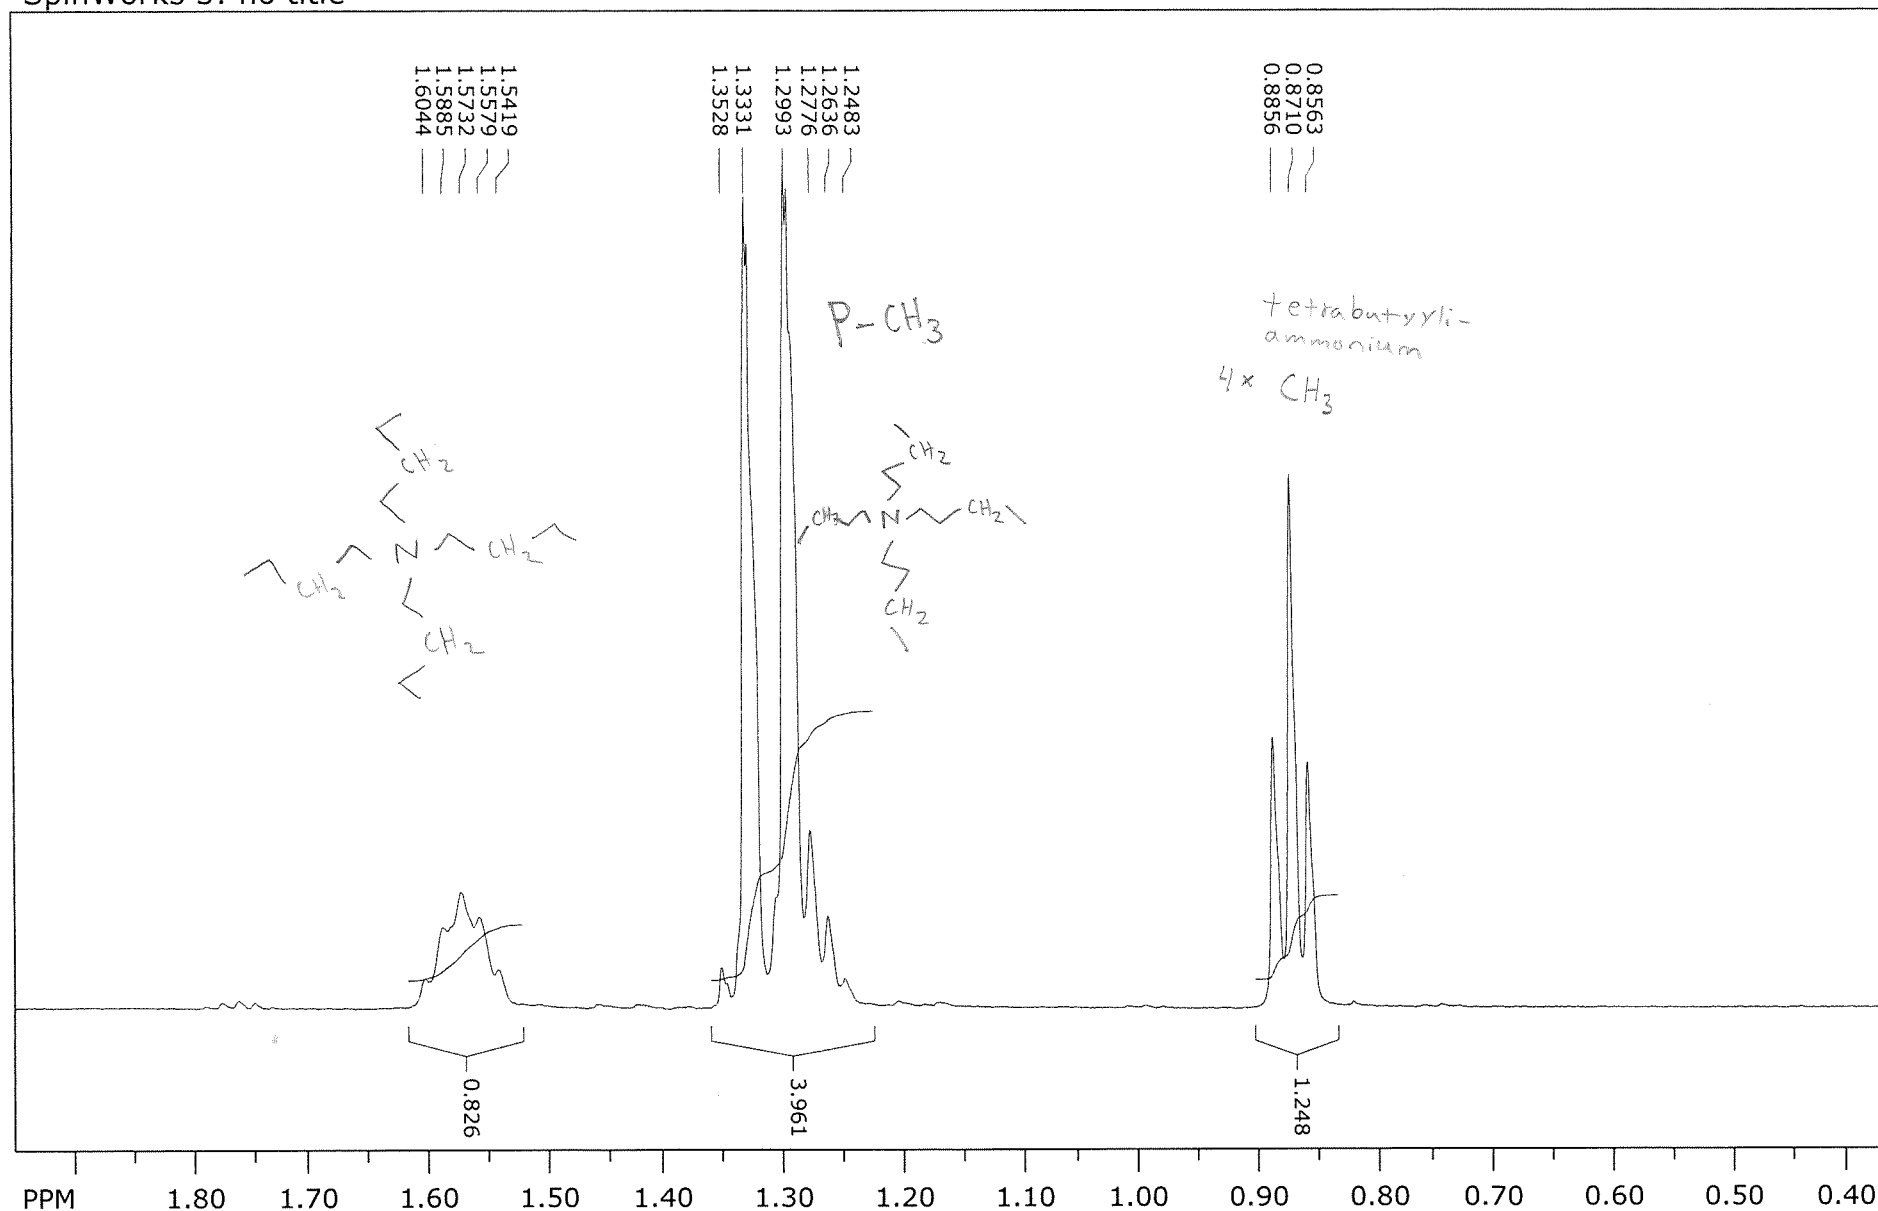

file: F:\urd-3'-Mephos\1\fid expt: <zg30>  
transmitter freq.: 500.133089 MHz  
time domain size: 65536 points  
width: 10330.58 Hz = 20.6557 ppm = 0.157632 Hz/pt  
number of scans: 16

freq. of 0 ppm: 500.130000 MHz  
processed size: 32768 complex points  
LB: 0.300 GF: 0.0000  
Hz/cm: 31.868 ppm/cm: 0.06372



Uridine 3'-(4-chlorophenyl) phosphate

SpinWorks 3: no title

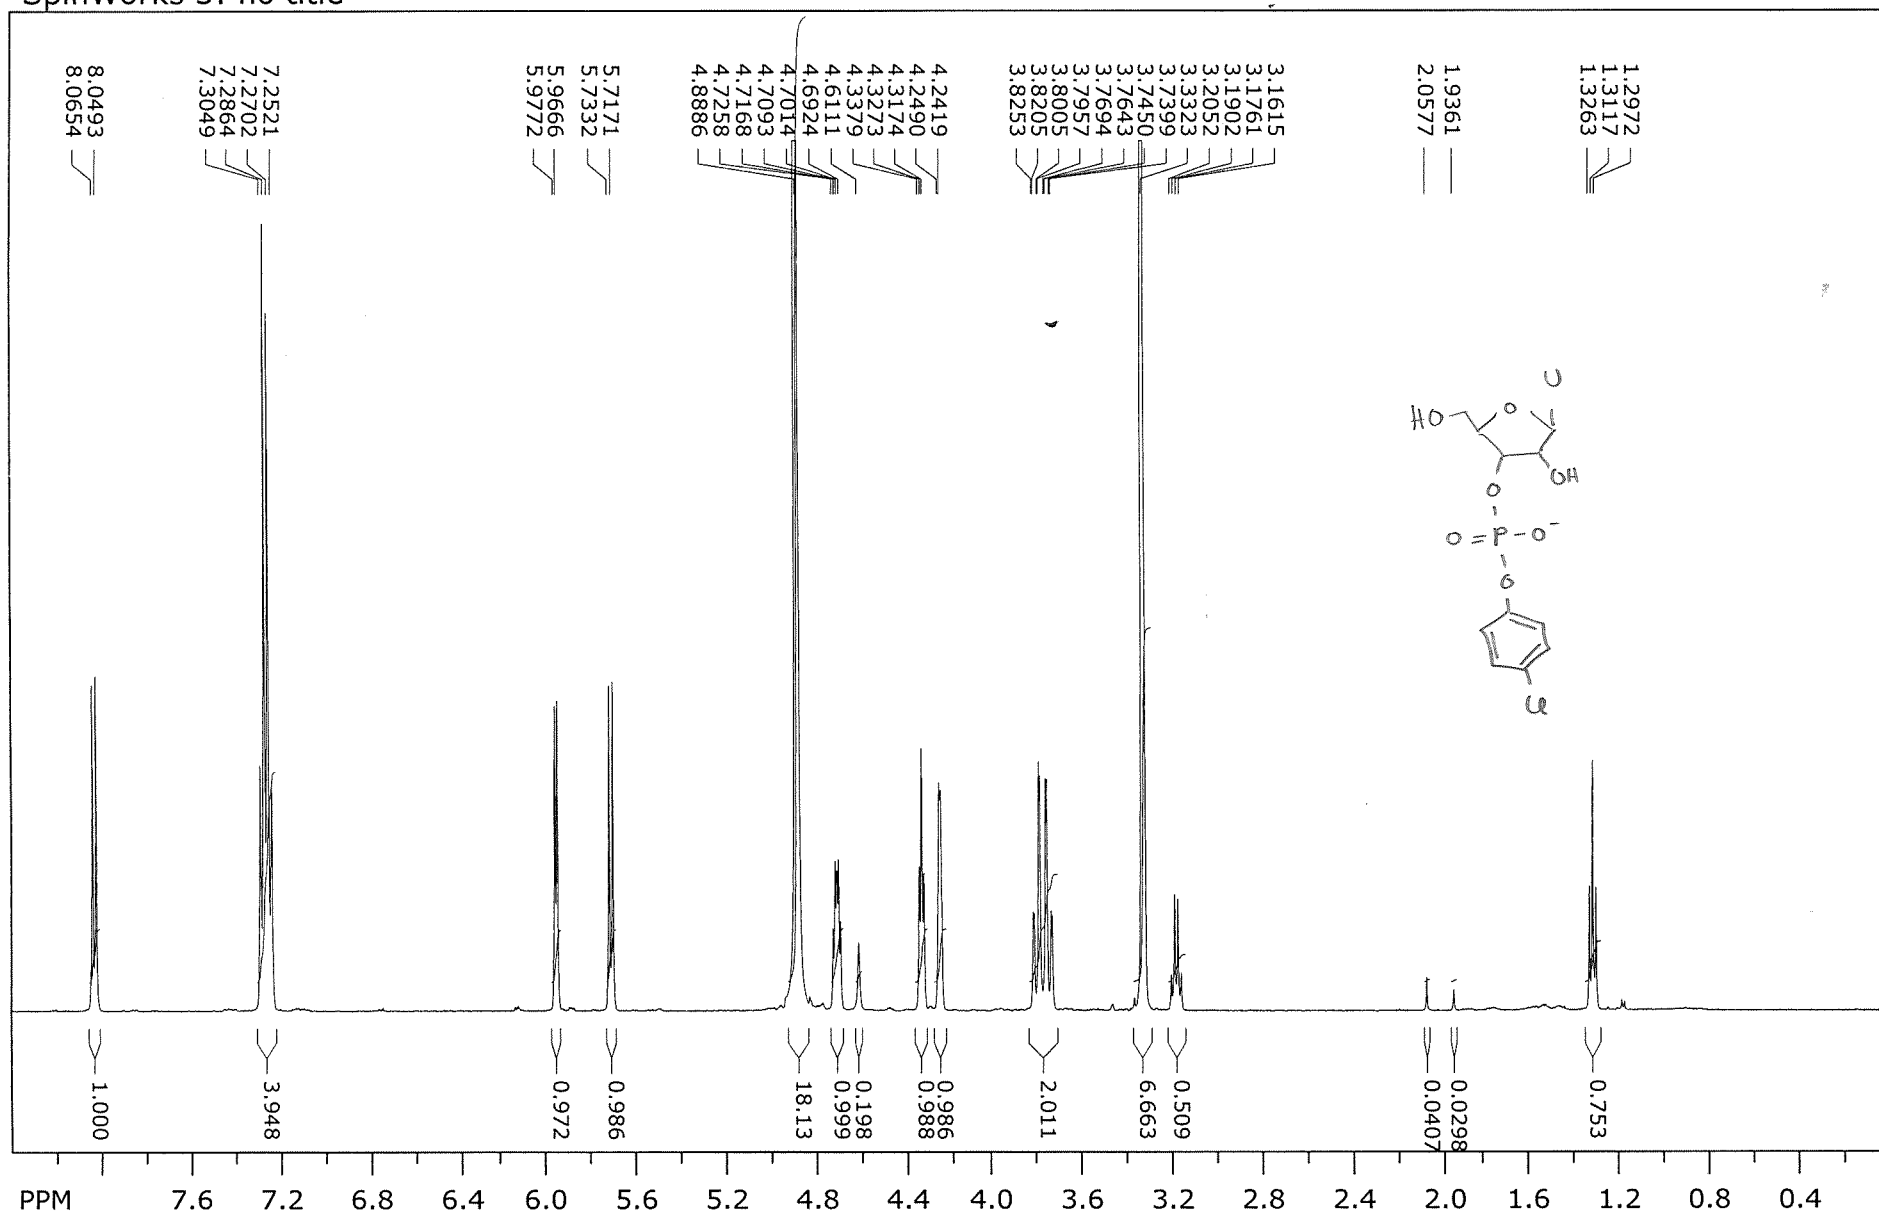

file: F:\nmr\4-kloori\1\fid expt: <zg30>  
transmitter freq.: 500.133089 MHz  
time domain size: 65536 points  
width: 10330.58 Hz = 20.6557 ppm = 0.157632 Hz/pt  
number of scans: 16

freq. of 0 ppm: 500.130000 MHz  
processed size: 32768 complex points  
LB: 0.300 GF: 0.0000  
Hz/cm: 169.255 ppm/cm: 0.33842

Uridine 3'-(2-chlorophenyl) phosphate

SpinWorks 3: no title

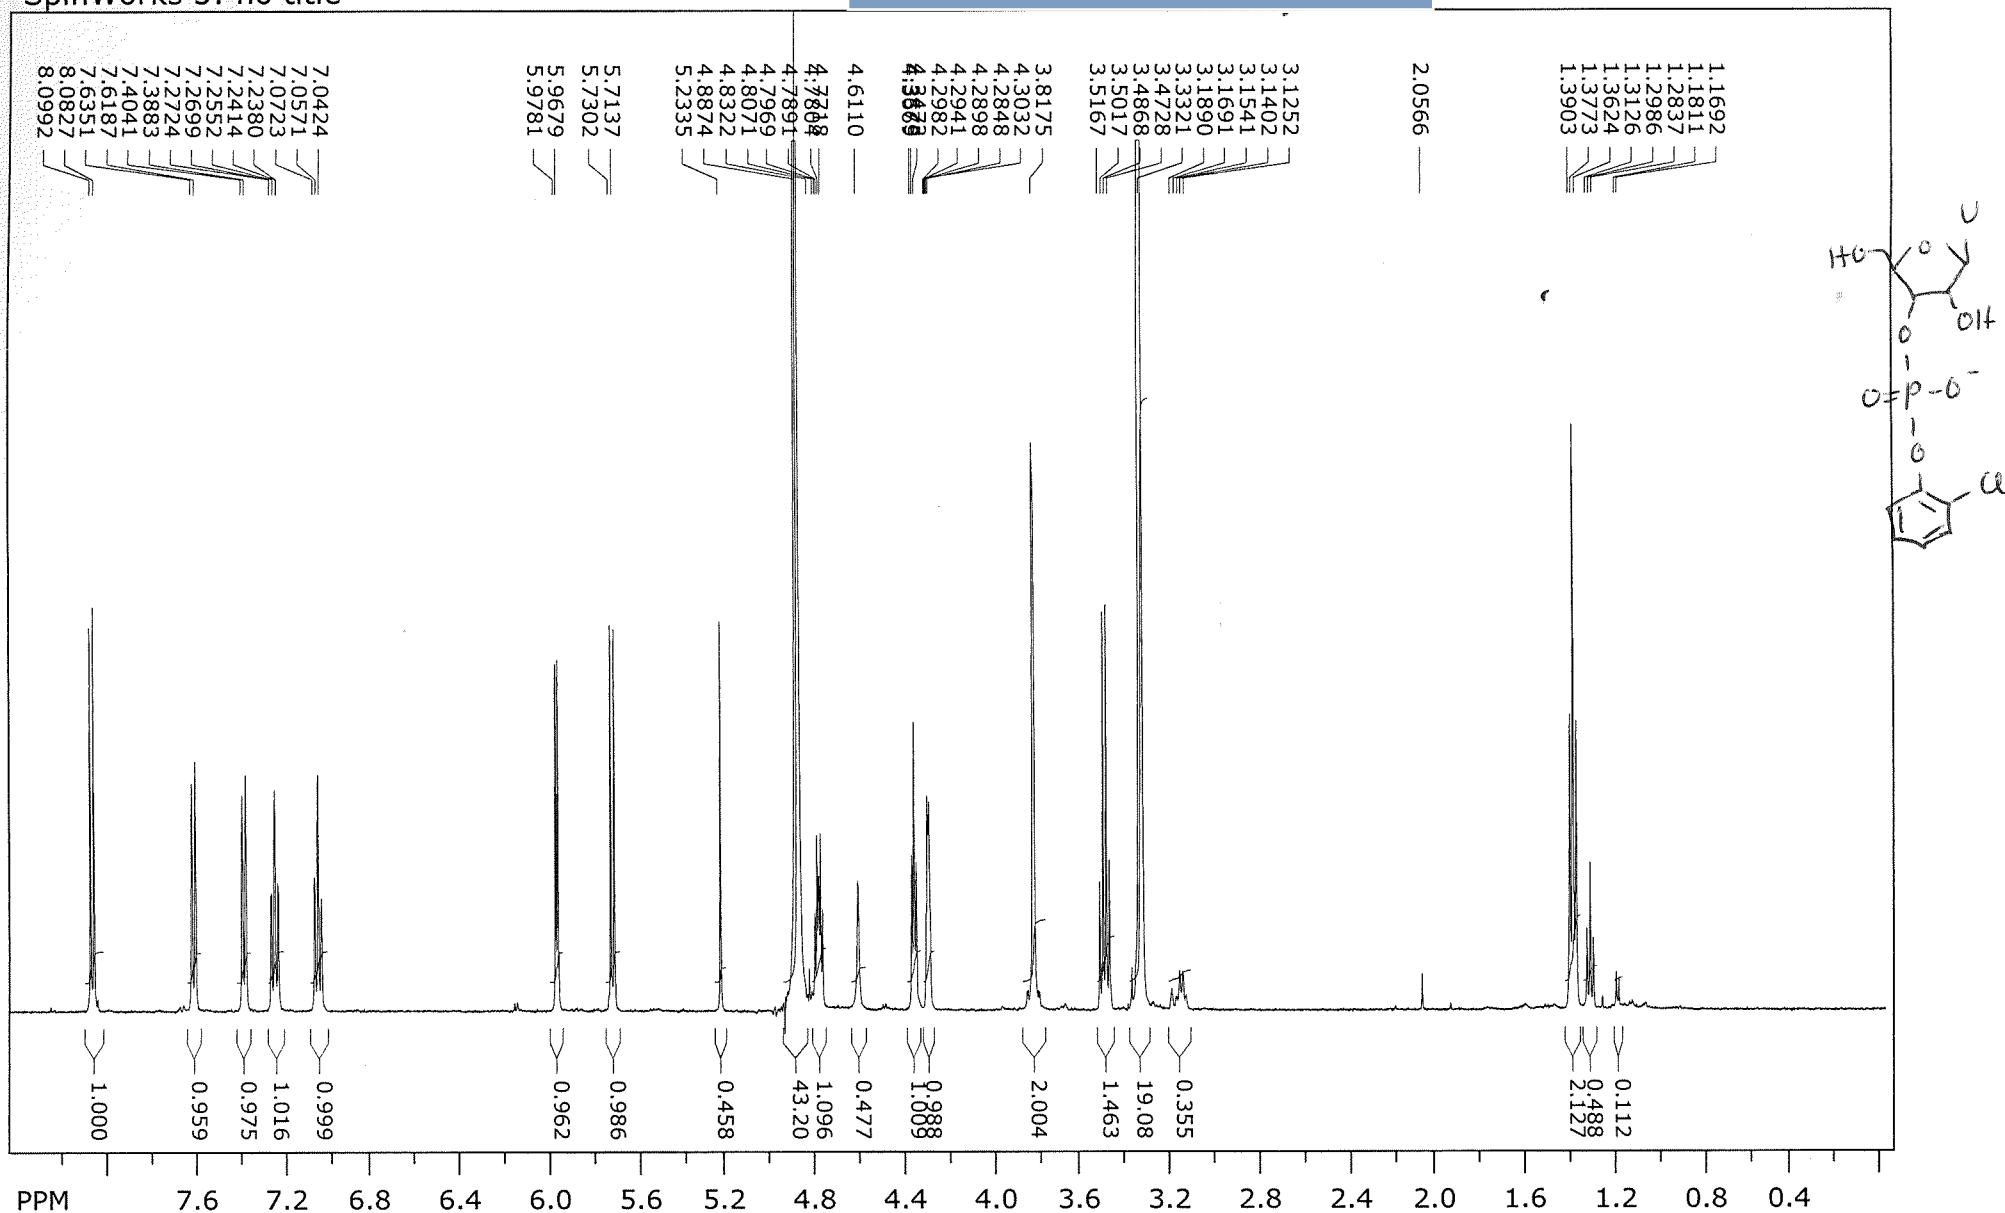

file: F:\2-cl\3\fid expt: <zg30>  
transmitter freq.: 500.133089 MHz  
time domain size: 65536 points  
width: 10330.58 Hz = 20.6557 ppm = 0.157632 Hz/pt  
number of scans: 16

freq. of 0 ppm: 500.130000 MHz  
processed size: 32768 complex points  
LB: 0.300 GF: 0.0000  
Hz/cm: 170.317 ppm/cm: 0.34054

Uridine 3'-(2,5-di-chlorophenyl) phosphate

SpinWorks 3: no title

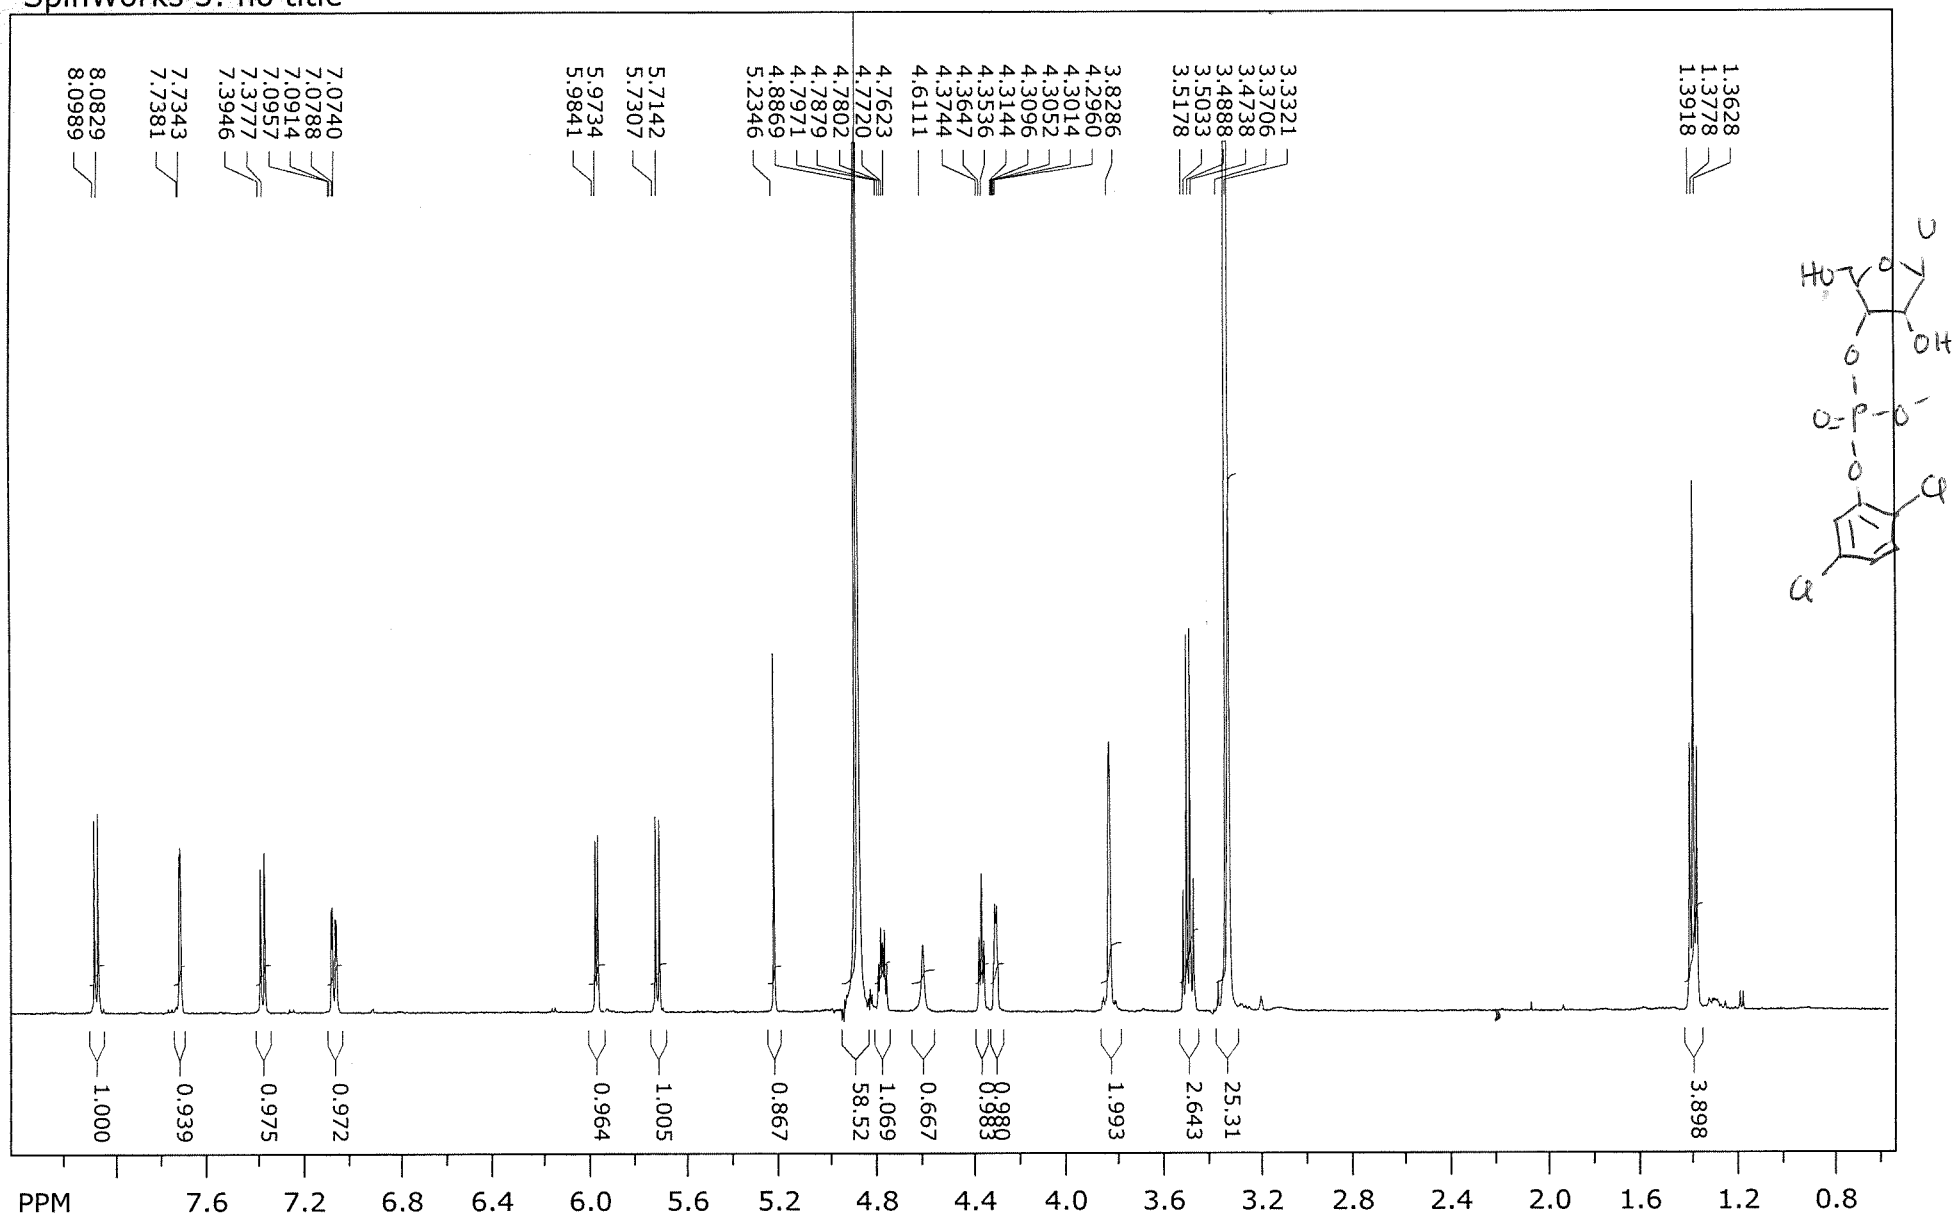

file: F:\2,5-cl\1\fid expt: <zg30>  
transmitter freq.: 500.133089 MHz  
time domain size: 65536 points  
width: 10330.58 Hz = 20.6557 ppm = 0.157632 Hz/pt  
number of scans: 16

freq. of 0 ppm: 500.130000 MHz  
processed size: 32768 complex points  
LB: 0.300 GF: 0.0000  
Hz/cm: 157.924 ppm/cm: 0.31576

SpinWorks 3: no title

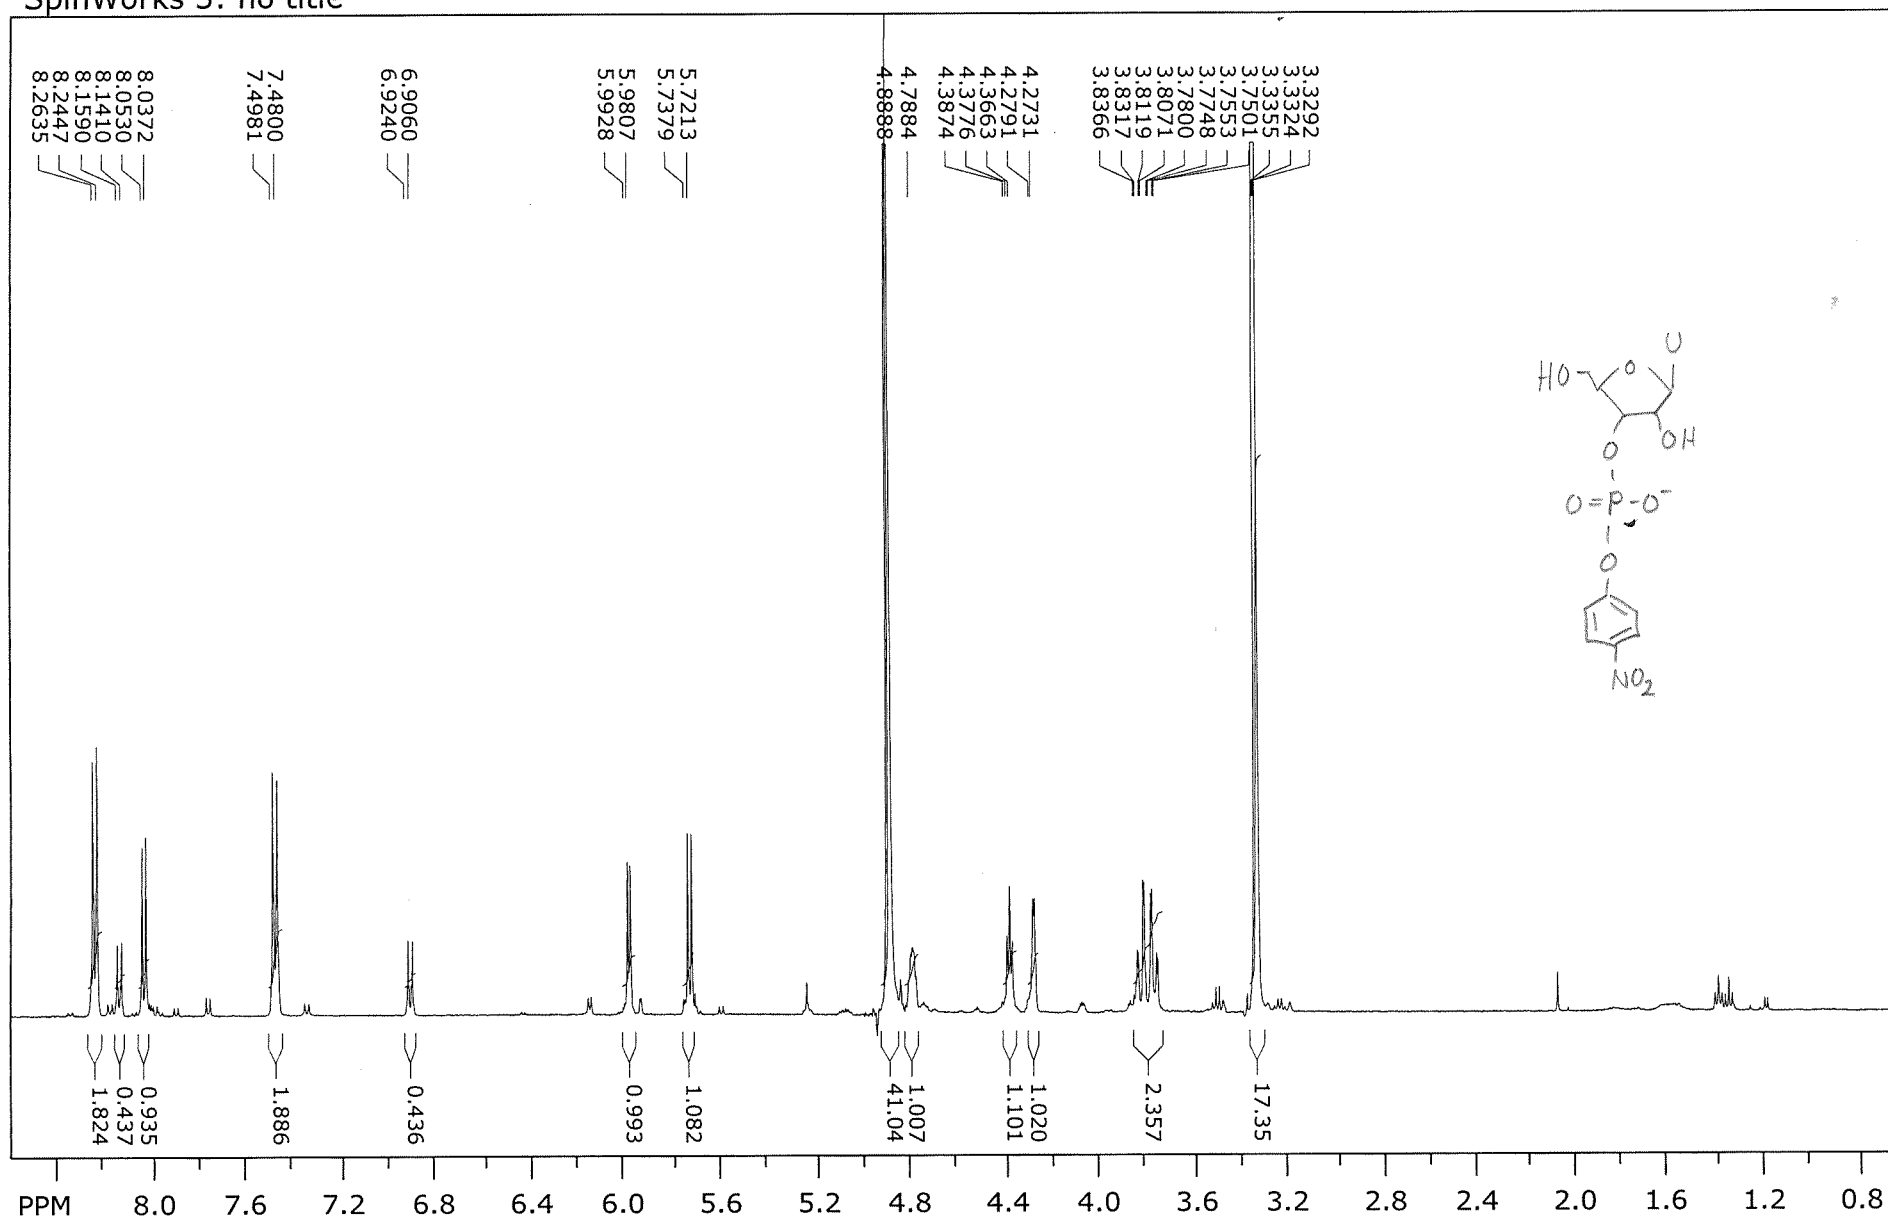

file: F:\nmr\NO2\1\fid expt: <zg30>  
transmitter freq.: 500.133089 MHz  
time domain size: 65536 points  
width: 10330.58 Hz = 20.6557 ppm = 0.157632 Hz/pt  
number of scans: 16

freq. of 0 ppm: 500.130000 MHz  
processed size: 32768 complex points  
LB: 0.300 GF: 0.0000  
Hz/cm: 159.341 ppm/cm: 0.31860

N,N,N',N'-tetrakis(2-pyridylmethyl)-2-hydroxy-1,3-propanediamine (19b):

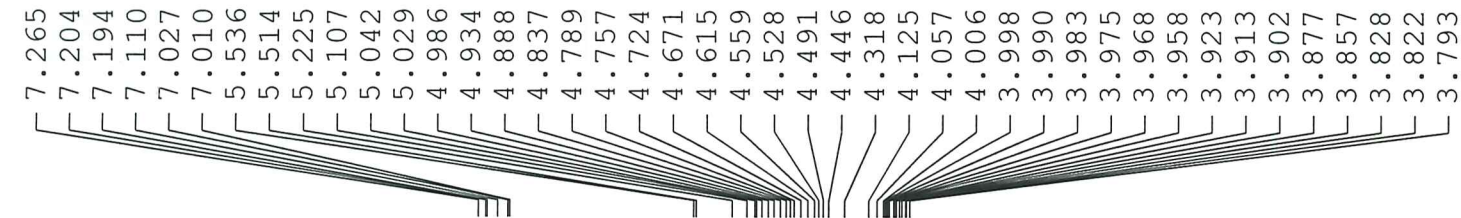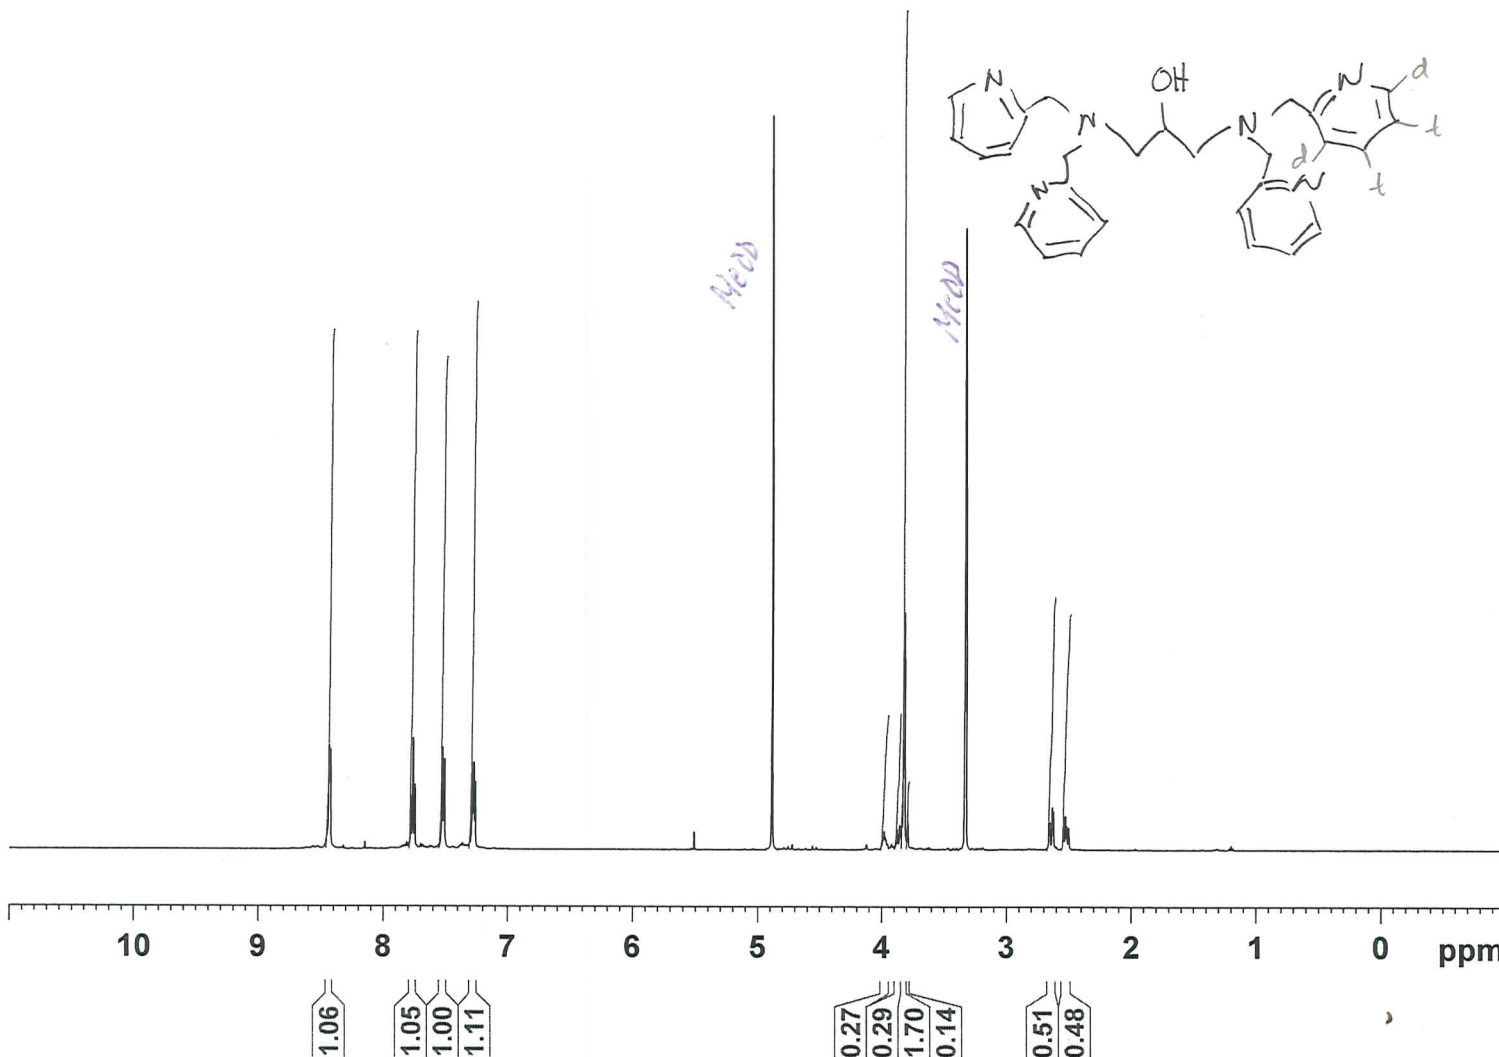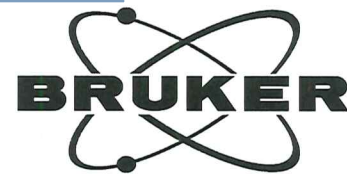

Current Data Parameters

NAME Lig05032012  
EXPNO 1  
PROCNO 1

F2 - Acquisition Parameters

Date\_ 20120305  
Time\_ 9.09  
INSTRUM AV500  
PROBHD 5 mm PABBI 1H-  
PULPROG zg30  
TD 65536  
SOLVENT MeOD  
NS 16  
DS 2  
SWH 10330.578 Hz  
FIDRES 0.157632 Hz  
AQ 3.1720407 sec  
RG 456.1  
DW 48.400 usec  
DE 6.00 usec  
TE 298.1 K  
D1 1.00000000 sec  
MCREST 0.00000000 sec  
MCWRK 0.01500000 sec

===== CHANNEL f1 =====

NUC1 1H  
P1 6.90 usec  
PL1 1.50 dB  
SFO1 500.1330885 MHz

F2 - Processing parameters

SI 32768  
SF 500.1300000 MHz  
WDW EM  
SSB 0  
LB 0.30 Hz  
GB 0  
PC 1.00

N,N,N',N'-tetrakis(2-pyridylmethyl)-2-hydroxy-1,3-propanediamine (19b)

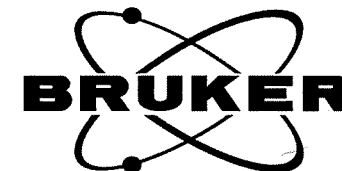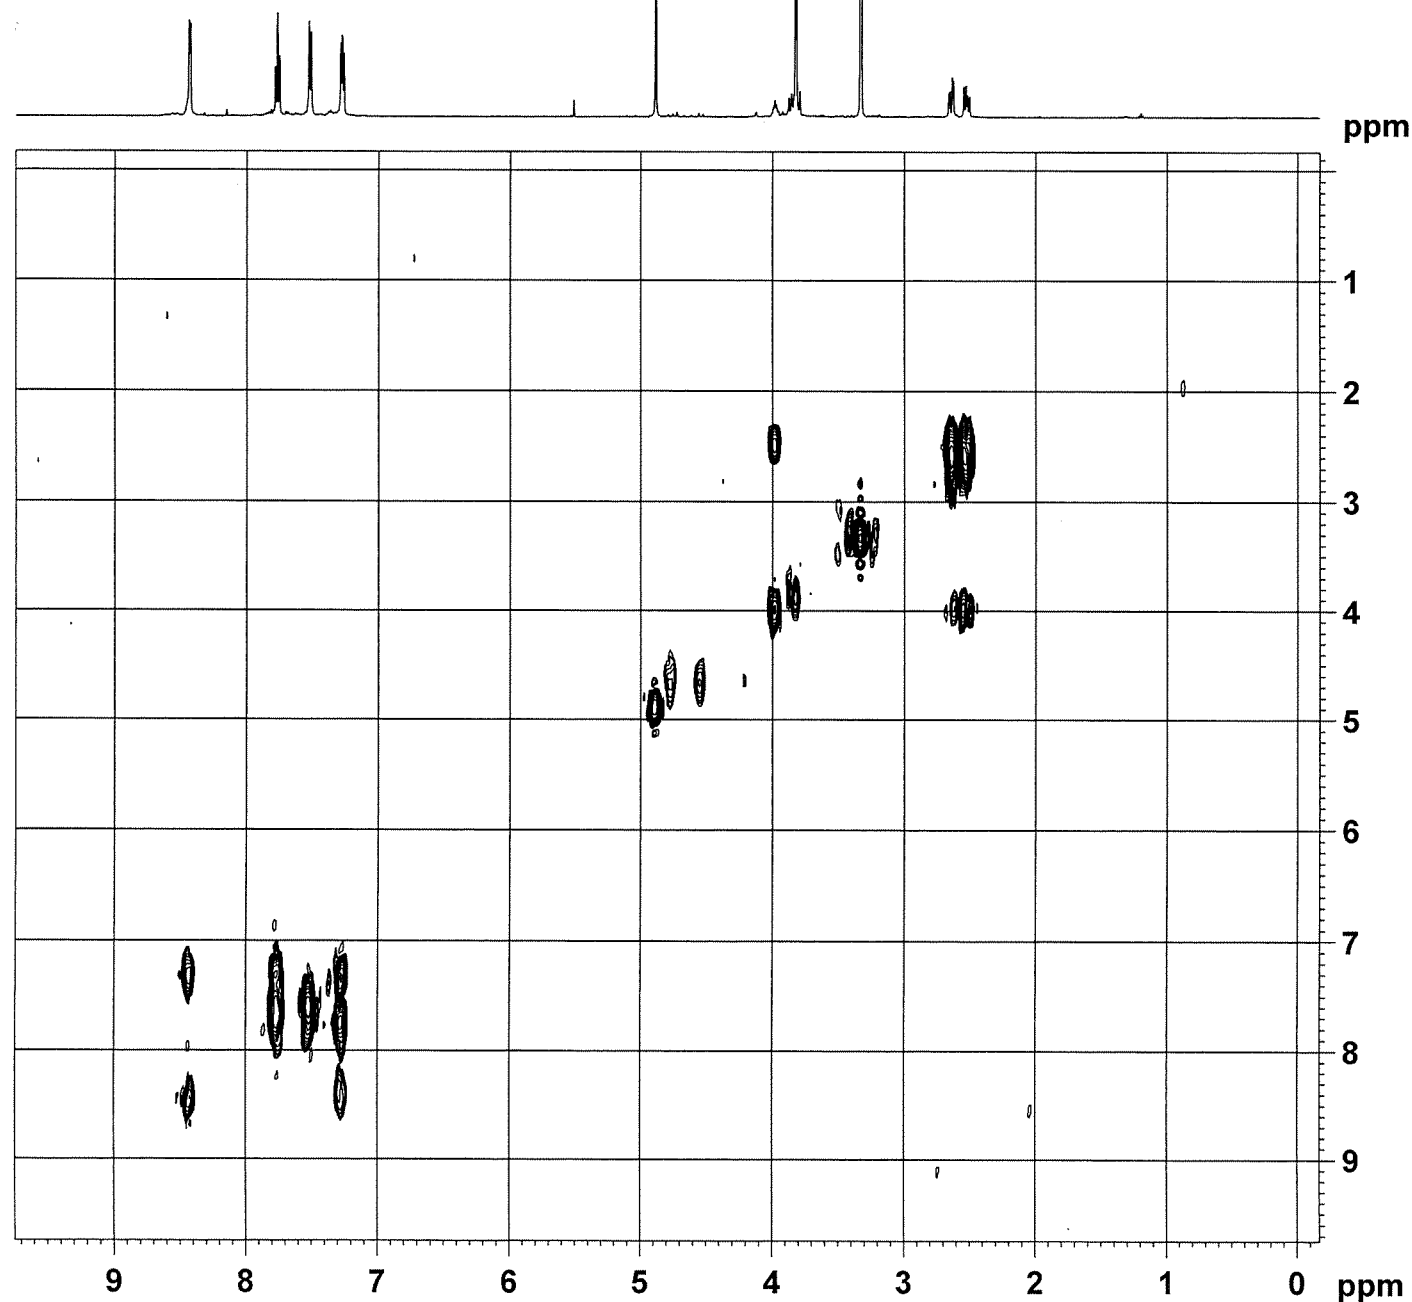

Current Data Parameters  
NAME Lig05032012  
EXPNO 2  
PROCNO 1

F2 - Acquisition Parameters  
Date\_ 20120305  
Time 9.13  
INSTRUM AV500  
PROBHD 5 mm PABBI 1H-  
PULPROG cosygpmfgr  
TD 1024  
SOLVENT DMSO  
NS 2  
DS 2  
SWH 6666.667 Hz  
FIDRES 6.510417 Hz  
AQ 0.0769250 sec  
RG 20642.5  
DW 75.000 usec  
DE 6.00 usec  
TE 298.1 K  
D0 0.00000300 sec  
D1 2.00000000 sec  
d13 0.00000400 sec  
D16 0.00020000 sec  
IN0 0.00015000 sec  
MCREST 0.00000000 sec  
MCWRR 2.00000000 sec

===== CHANNEL f1 =====  
NUC1 1H  
P1 6.90 usec  
PL1 1.50 dB  
SFO1 500.1330069 MHz

===== GRADIENT CHANNEL =====  
GPNAM1 SINE.100  
GPNAM2 SINE.100  
GPNAM3 SINE.100  
GPX1 0.00 %  
GPX2 0.00 %  
GPX3 0.00 %  
GPY1 0.00 %  
GPY2 0.00 %  
GPY3 0.00 %  
GPZ1 16.00 %  
GPZ2 12.00 %  
GPZ3 40.00 %  
P16 1000.00 usec

F1 - Acquisition parameters  
ND0 1  
TD 65  
SFO1 500.133 MHz  
FIDRES 102.564102 Hz  
SW 13.330 ppm  
FMODE QF

F2 - Processing parameters  
SI 1024  
SF 500.1300000 MHz  
WDW SINE  
SSB 0  
LB 0.00 Hz  
GB 0  
PC 1.00

F1 - Processing parameters  
SI 1024  
MC2 QF  
SF 500.1300000 MHz  
WDW SINE  
SSB 0  
LB 0.00 Hz  
GB 0



N,N,N',N'-tetrakis(4-imidazolymethyl)-2-hydroxy-1,3-propanediamine (22)

4.773  
4.765  
4.758  
4.704  
4.654  
4.646  
4.641  
4.456  
4.411  
4.350  
4.266  
3.959  
3.836  
3.827  
3.819  
3.814  
3.802  
3.792  
3.786  
3.774  
3.764  
3.759  
3.753  
3.748  
3.745  
3.737  
3.731  
3.711  
3.688  
3.682  
3.640  
3.611  
3.599  
3.591  
3.574  
3.562  
3.551  
3.542  
3.527  
3.521  
3.514  
3.507  
3.498

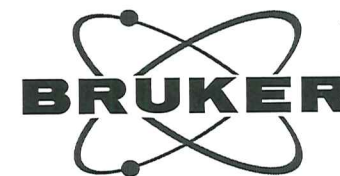

Current Data Parameters  
NAME im-kationv  
EXPNO 1  
PROCNO 1

F2 - Acquisition Parameters  
Date 20070625  
Time 11.12  
INSTRUM AV500  
PROBHD 5 mm PABBI 1H-  
PULPROG zg30  
TD 65536  
SOLVENT D2O  
NS 16  
DS 2  
SWH 10330.578 Hz  
FIDRES 0.157632 Hz  
AQ 3.1720407 sec  
RG 362  
DW 48.400 usec  
DE 6.00 usec  
TE 298.1 K  
D1 1.00000000 sec  
MCREST 0.00000000 sec  
MCWRK 0.01500000 sec

===== CHANNEL f1 =====  
NUC1 1H  
P1 6.90 usec  
PL1 1.50 dB  
SFO1 500.1330885 MHz

F2 - Processing parameters  
SI 32768  
SF 500.1300000 MHz  
WDW EM  
SSB 0  
LB 0.30 Hz  
GB 0  
PC 1.00

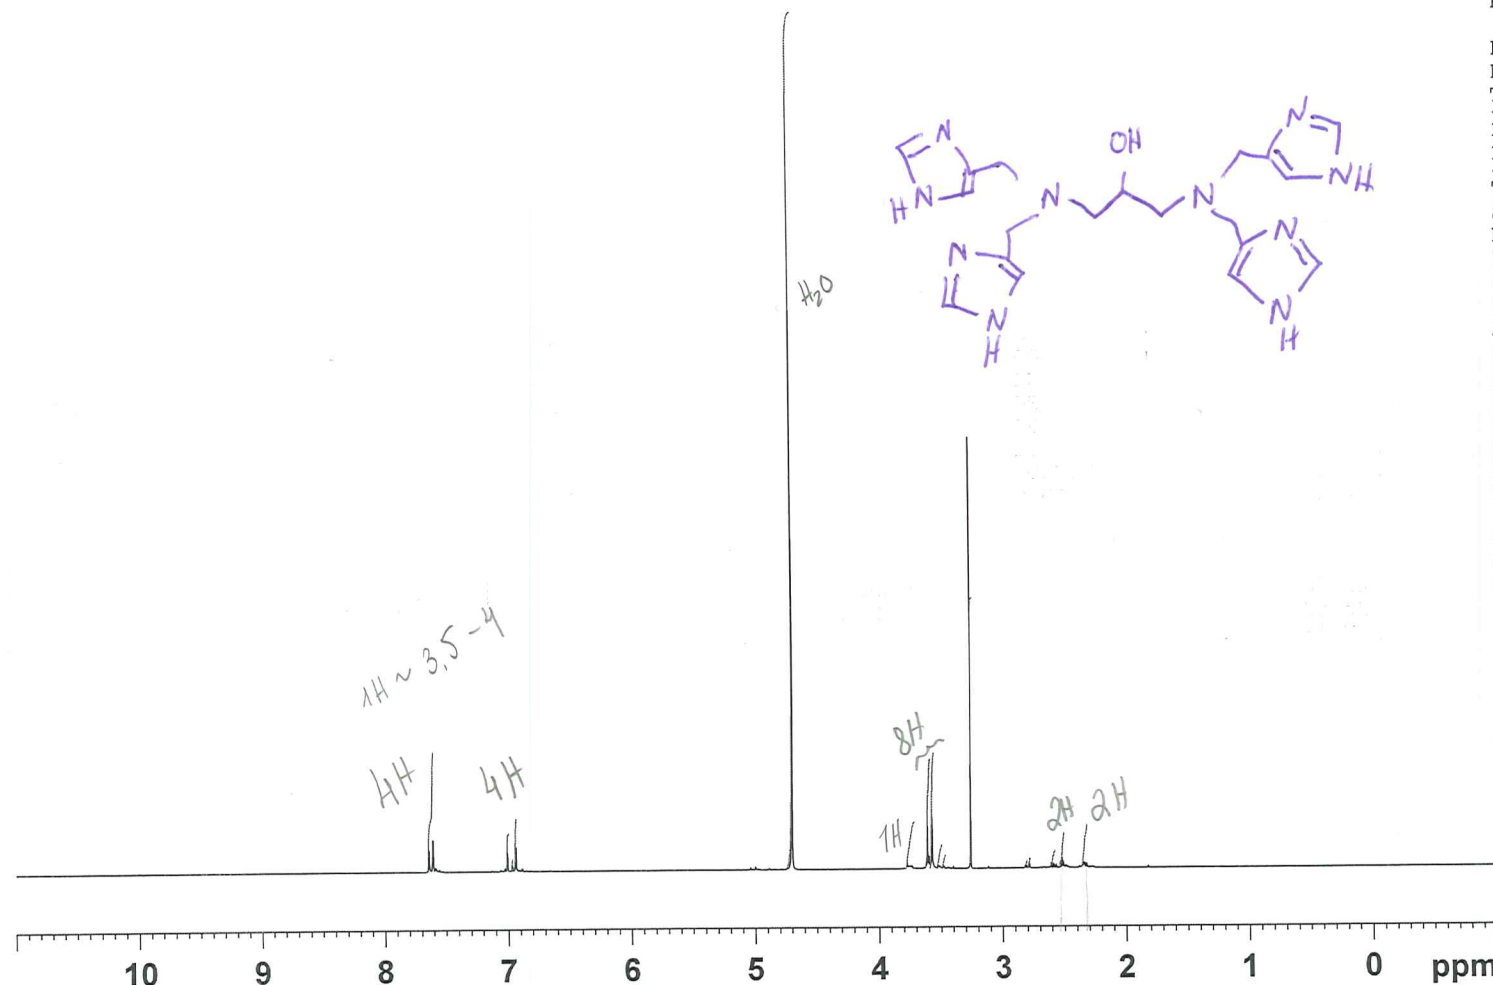

15.53  
4.94  
1.67  
6.92  
110.21  
6.05  
14.41  
15.01  
3.11  
1.77  
34.68  
1.00  
1.34  
2.29  
4.60  
5.60

N,N,N',N'-tetrakis(4-imidazolymethyl)-2-hydroxy-1,3-propanediamine (22)

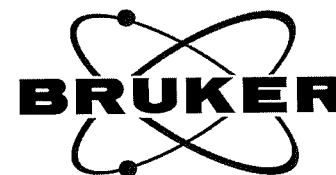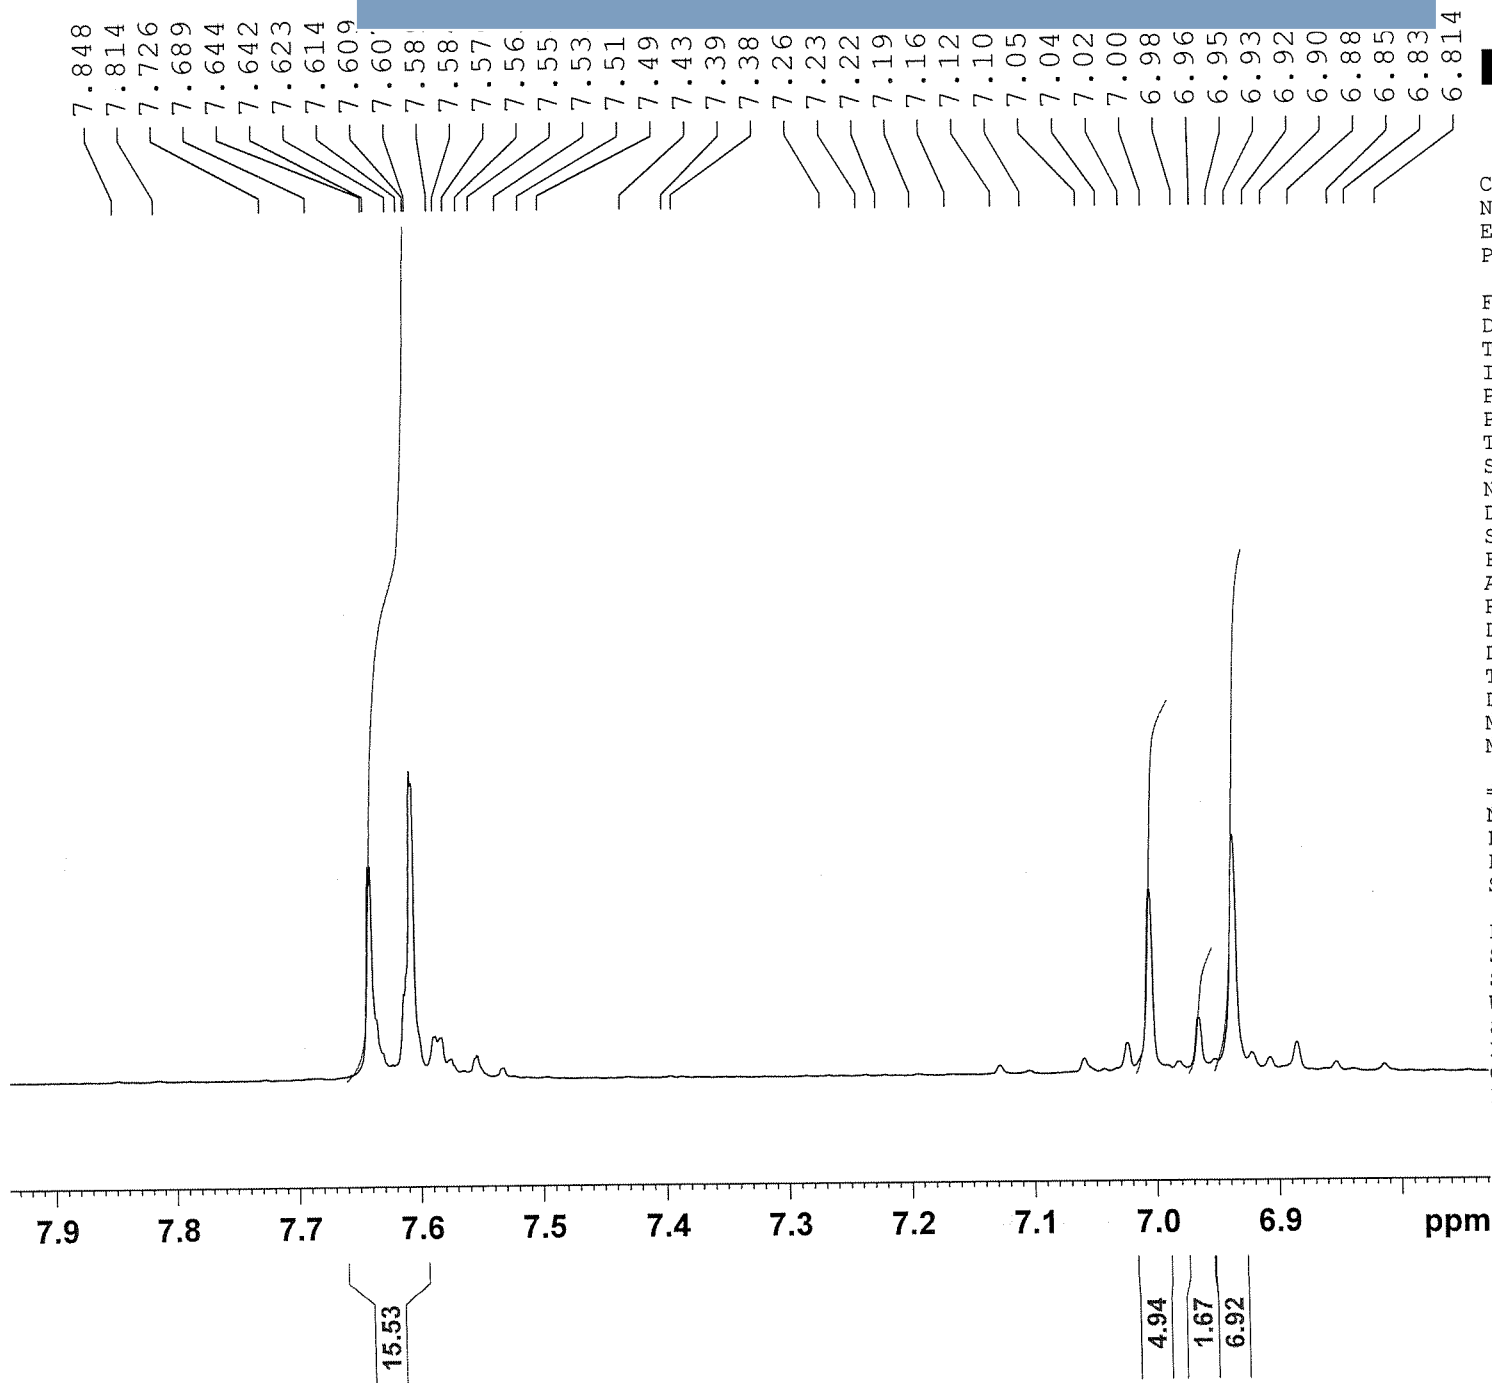

Current Data Parameters  
NAME im-kationv  
EXPNO 1  
PROCNO 1

F2 - Acquisition Parameters  
Date\_ 20070625  
Time\_ 11.12  
INSTRUM AV500  
PROBHD 5 mm PABBI 1H-  
PULPROG zg30  
TD 65536  
SOLVENT D2O  
NS 16  
DS 2  
SWH 10330.578 Hz  
FIDRES 0.157632 Hz  
AQ 3.1720407 sec  
RG 362  
DW 48.400 usec  
DE 6.00 usec  
TE 298.1 K  
D1 1.00000000 sec  
MCREST 0.00000000 sec  
MCWRK 0.01500000 sec

===== CHANNEL f1 =====  
NUC1 1H  
P1 6.90 usec  
PL1 1.50 dB  
SFO1 500.1330885 MHz

F2 - Processing parameters  
SI 32768  
SF 500.1300000 MHz  
WDW EM  
SSB 0  
LB 0.30 Hz  
GB 0  
PC 1.00

N,N,N',N'-tetrakis(4-imidazolymethyl)-2-hydroxy-1,3-propanediamine (22)

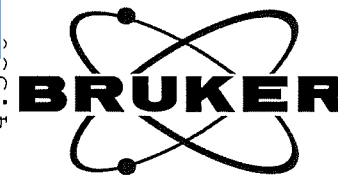

Current Data Parameters  
NAME im-kationv  
EXPNO 1  
PROCNO 1

F2 - Acquisition Parameters  
Date\_ 20070625  
Time\_ 11.12  
INSTRUM AV500  
PROBHD 5 mm PABBI 1H-  
PULPROG zg30  
TD 65536  
SOLVENT D2O  
NS 16  
DS 2  
SWH 10330.578 Hz  
FIDRES 0.157632 Hz  
AQ 3.1720407 sec  
RG 362  
DW 48.400 usec  
DE 6.00 usec  
TE 298.1 K  
D1 1.00000000 sec  
MCREST 0.00000000 sec  
MCWRK 0.01500000 sec

===== CHANNEL f1 =====  
NUC1 1H  
P1 6.90 usec  
PL1 1.50 dB  
SFO1 500.1330885 MHz

F2 - Processing parameters  
SI 32768  
SF 500.1300000 MHz  
WDW EM  
SSB 0  
LB 0.30 Hz  
GB 0  
PC 1.00

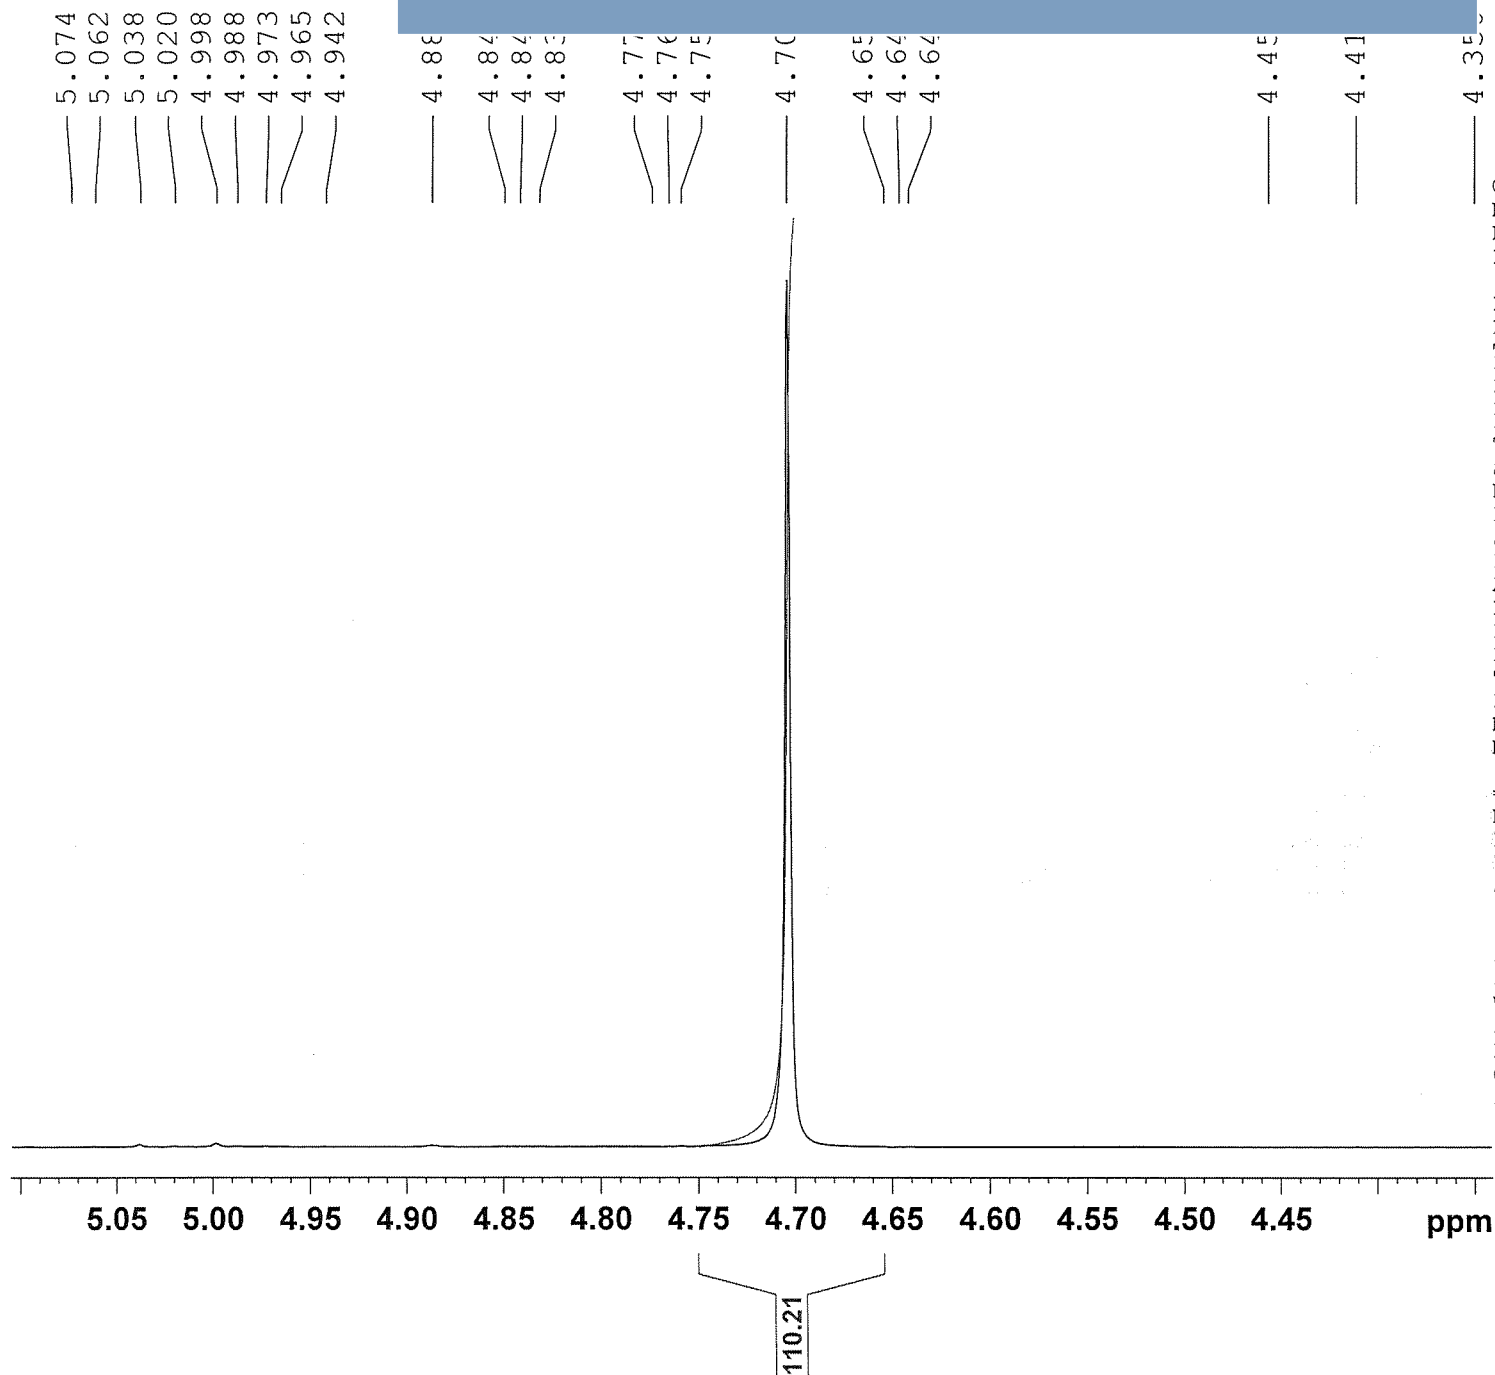

N,N,N',N'-tetrakis(4-imidazolylmethyl)-2-hydroxy-1,3-propanediamine (22)

No title

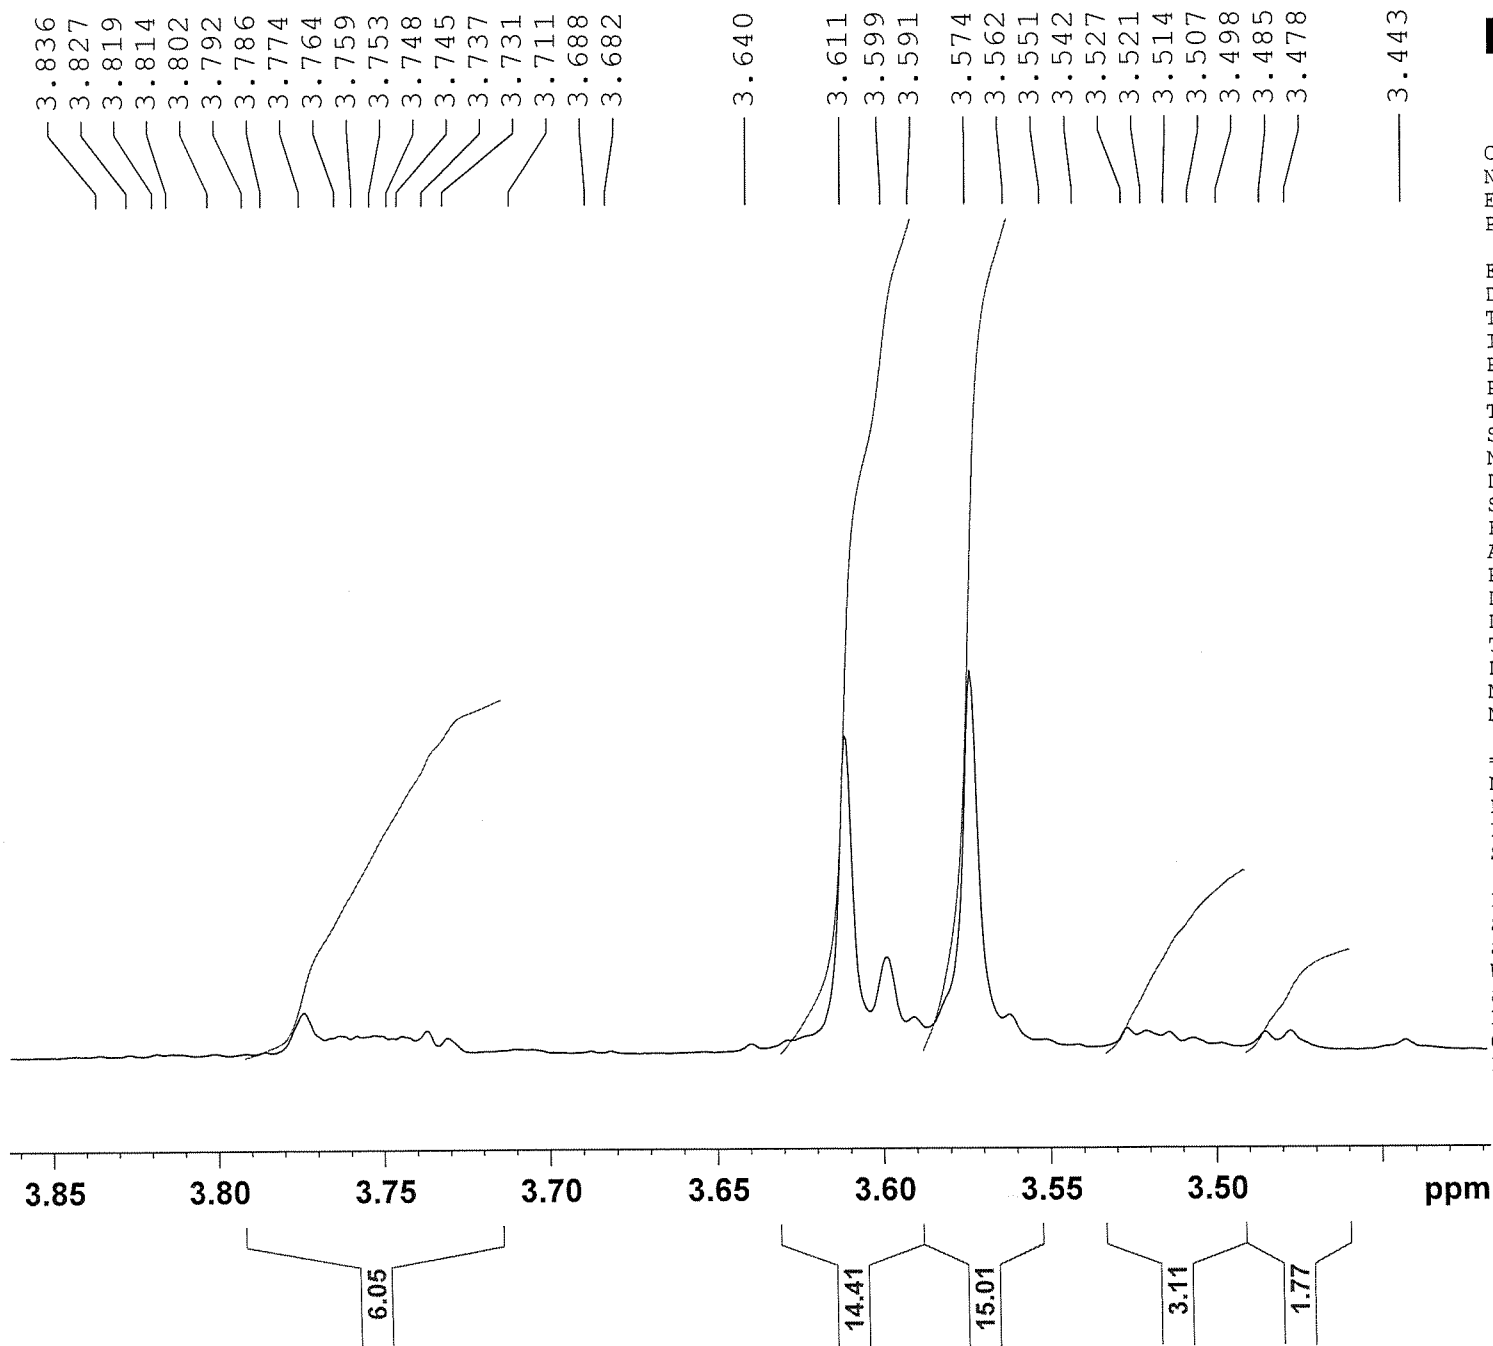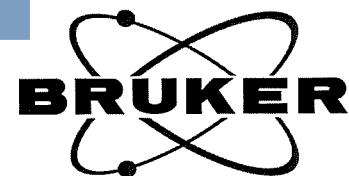

Current Data Parameters  
NAME im-kationv  
EXPNO 1  
PROCNO 1

F2 - Acquisition Parameters  
Date\_ 20070625  
Time\_ 11.12  
INSTRUM AV500  
PROBHD 5 mm PABBI 1H-  
PULPROG zg30  
TD 65536  
SOLVENT D2O  
NS 16  
DS 2  
SWH 10330.578 Hz  
FIDRES 0.157632 Hz  
AQ 3.1720407 sec  
RG 362  
DW 48.400 usec  
DE 6.00 usec  
TE 298.1 K  
D1 1.00000000 sec  
MCREST 0.00000000 sec  
MCWRK 0.01500000 sec

===== CHANNEL f1 =====  
NUC1 1H  
P1 6.90 usec  
PL1 1.50 dB  
SFO1 500.1330885 MHz

F2 - Processing parameters  
SI 32768  
SF 500.1300000 MHz  
WDW EM  
SSB 0  
LB 0.30 Hz  
GB 0  
PC 1.00

1,3-Bis(1,4,7-triazacyclonon-1-yl)-2-hydroxypropane (17a)

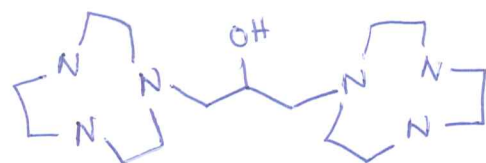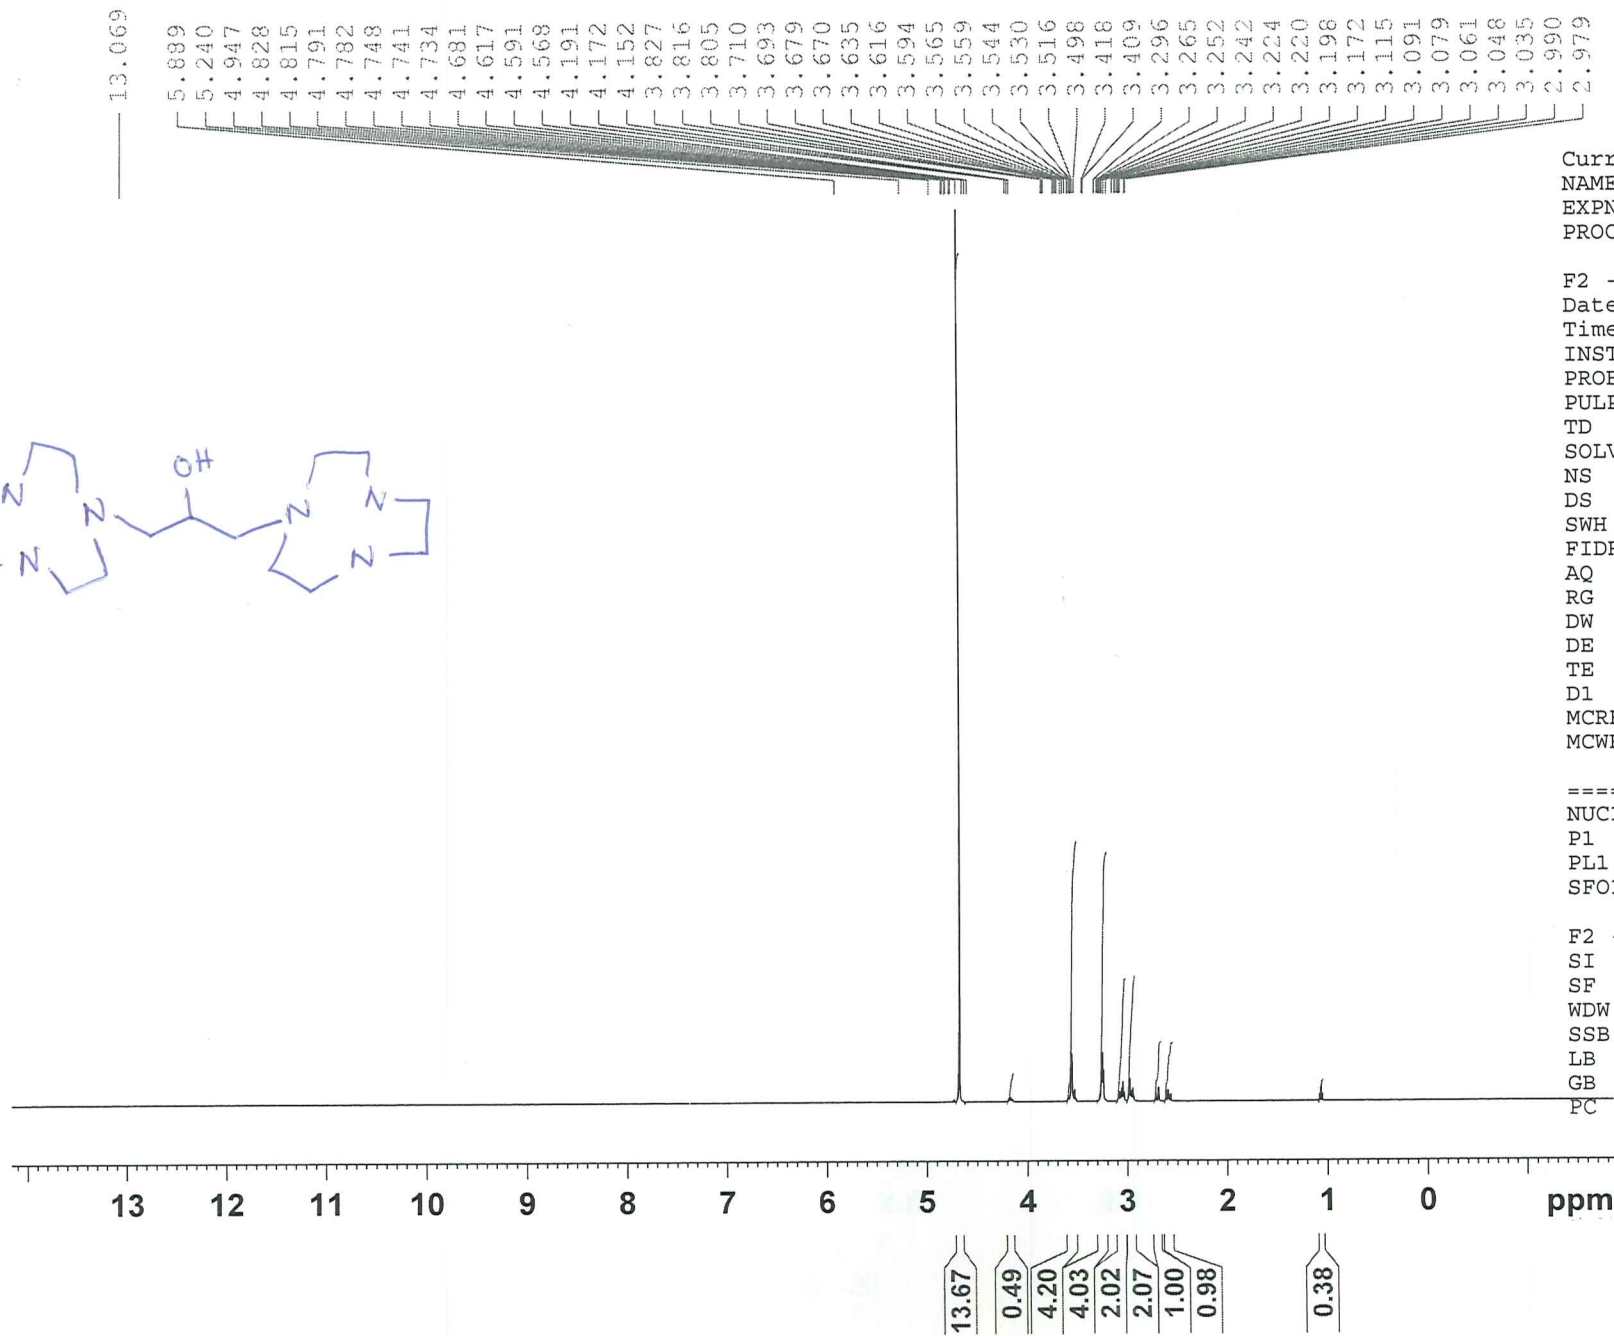

Current Data Parameters  
NAME L2 (OH)  
EXPNO 1  
PROCNO 1

F2 - Acquisition Parameters  
Date\_ 20120912  
Time 8.10  
INSTRUM AV500  
PROBHD 5 mm PABBI 1H-  
PULPROG zg30  
TD 65536  
SOLVENT CDCl3  
NS 8  
DS 0  
SWH 8012.820 Hz  
FIDRES 0.122266 Hz  
AQ 4.0895586 sec  
RG 645.1  
DW 62.400 usec  
DE 6.00 usec  
TE 298.1 K  
D1 1.00000000 sec  
MCREST 0.00000000 sec  
MCWRK 0.01500000 sec

===== CHANNEL f1 =====  
NUC1 1H  
P1 6.90 usec  
PL1 1.50 dB  
SFO1 500.1330885 MHz

F2 - Processing parameters  
SI 32768  
SF 500.1300116 MHz  
WDW EM  
SSB 0  
LB 0.10 Hz  
GB 0  
PC 1.40

1,3-Bis(1,4,7-triazacyclonon-1-yl)-2-hydroxypropane (17a)

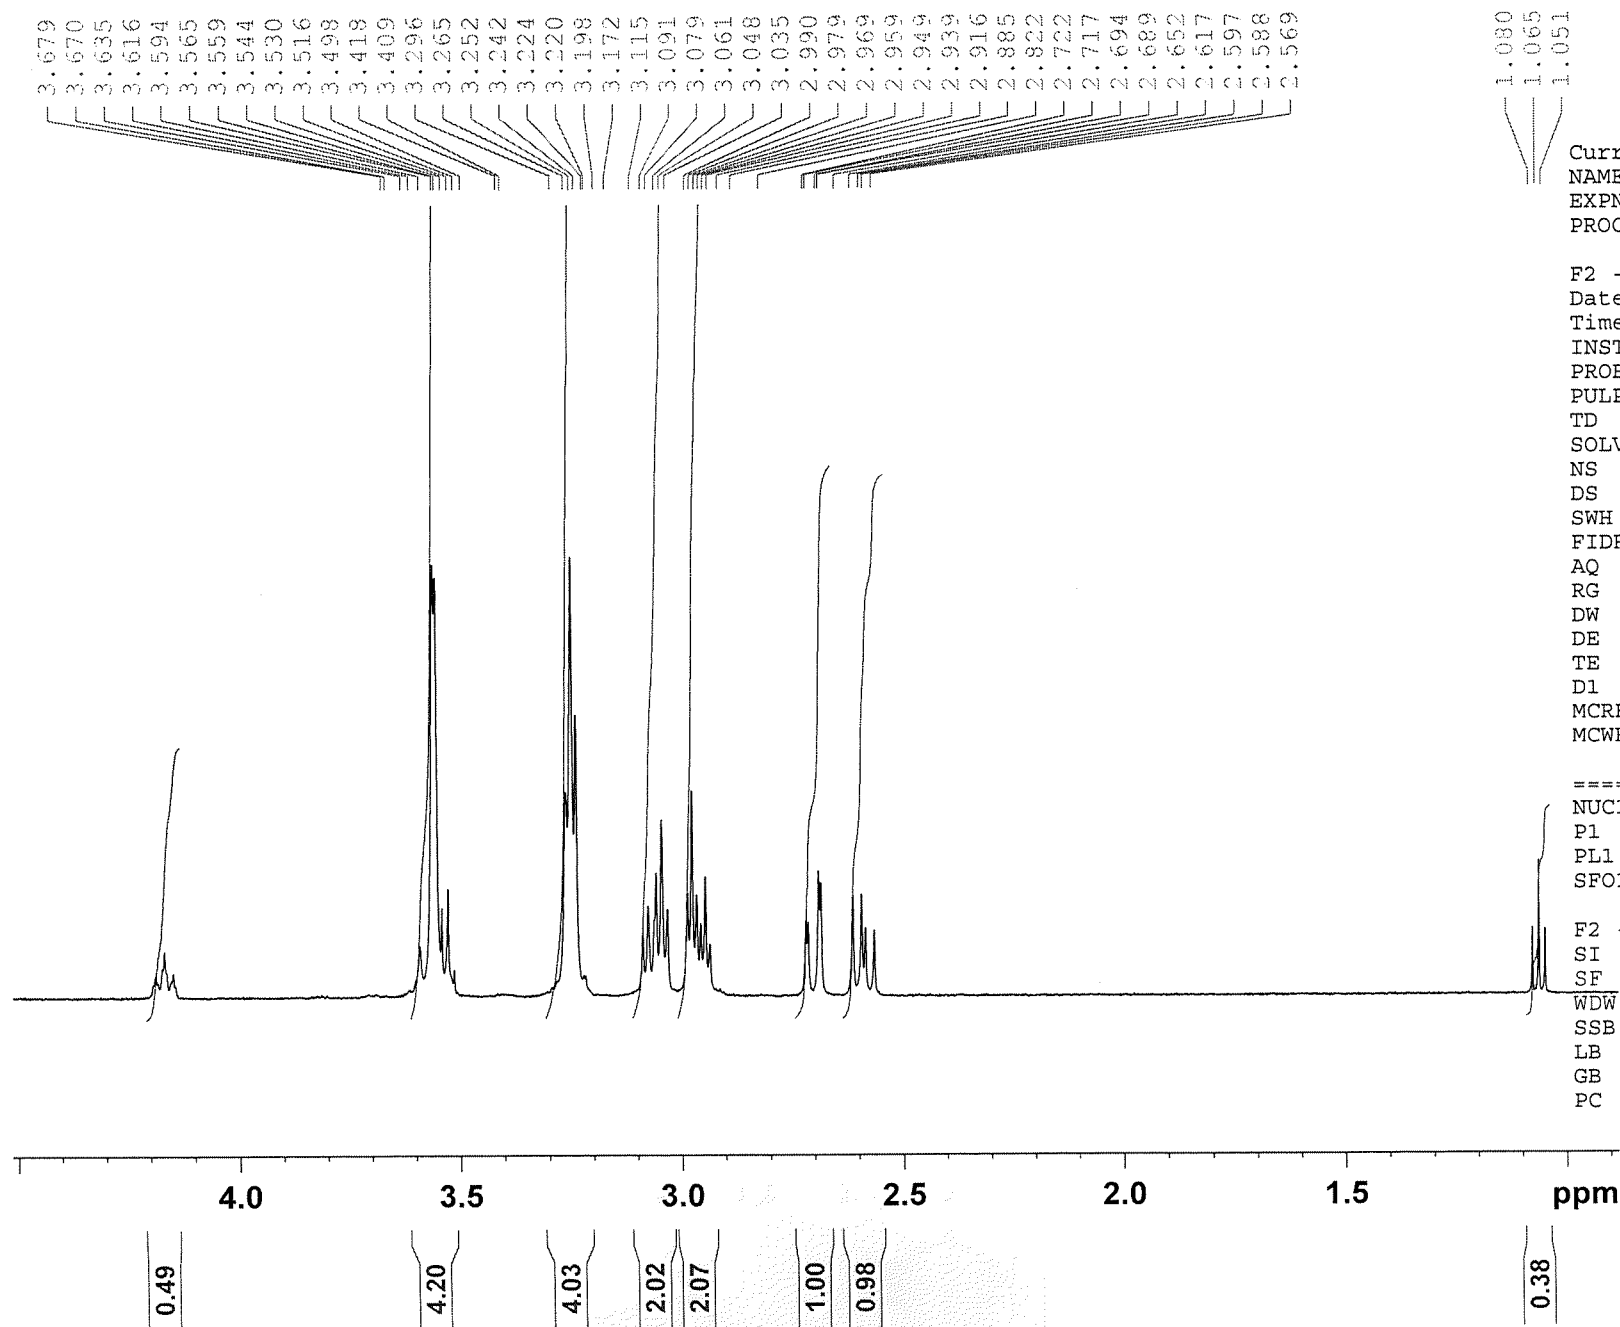

1.080  
1.065  
1.051

Current Data Parameters

NAME L2 (OH)  
EXPNO 1  
PROCNO 1

F2 - Acquisition Parameters

Date\_ 20120912  
Time 8.10  
INSTRUM AV500  
PROBHD 5 mm PABBI 1H-  
PULPROG zg30  
TD 65536  
SOLVENT CDCl3  
NS 8  
DS 0  
SWH 8012.820 Hz  
FIDRES 0.122266 Hz  
AQ 4.0895586 sec  
RG 645.1  
DW 62.400 usec  
DE 6.00 usec  
TE 298.1 K  
D1 1.00000000 sec  
MCREST 0.00000000 sec  
MCWRK 0.01500000 sec

===== CHANNEL f1 =====

NUC1 1H  
P1 6.90 usec  
PL1 1.50 dB  
SFO1 500.1330885 MHz

F2 - Processing parameters

SI 32768  
SF 500.1300116 MHz  
WDW EM  
SSB 0  
LB 0.10 Hz  
GB 0  
PC 1.40



1,3-Bis(1,4,7-triazacyclonon-1-yl)-2-hydroxypropane (17a)

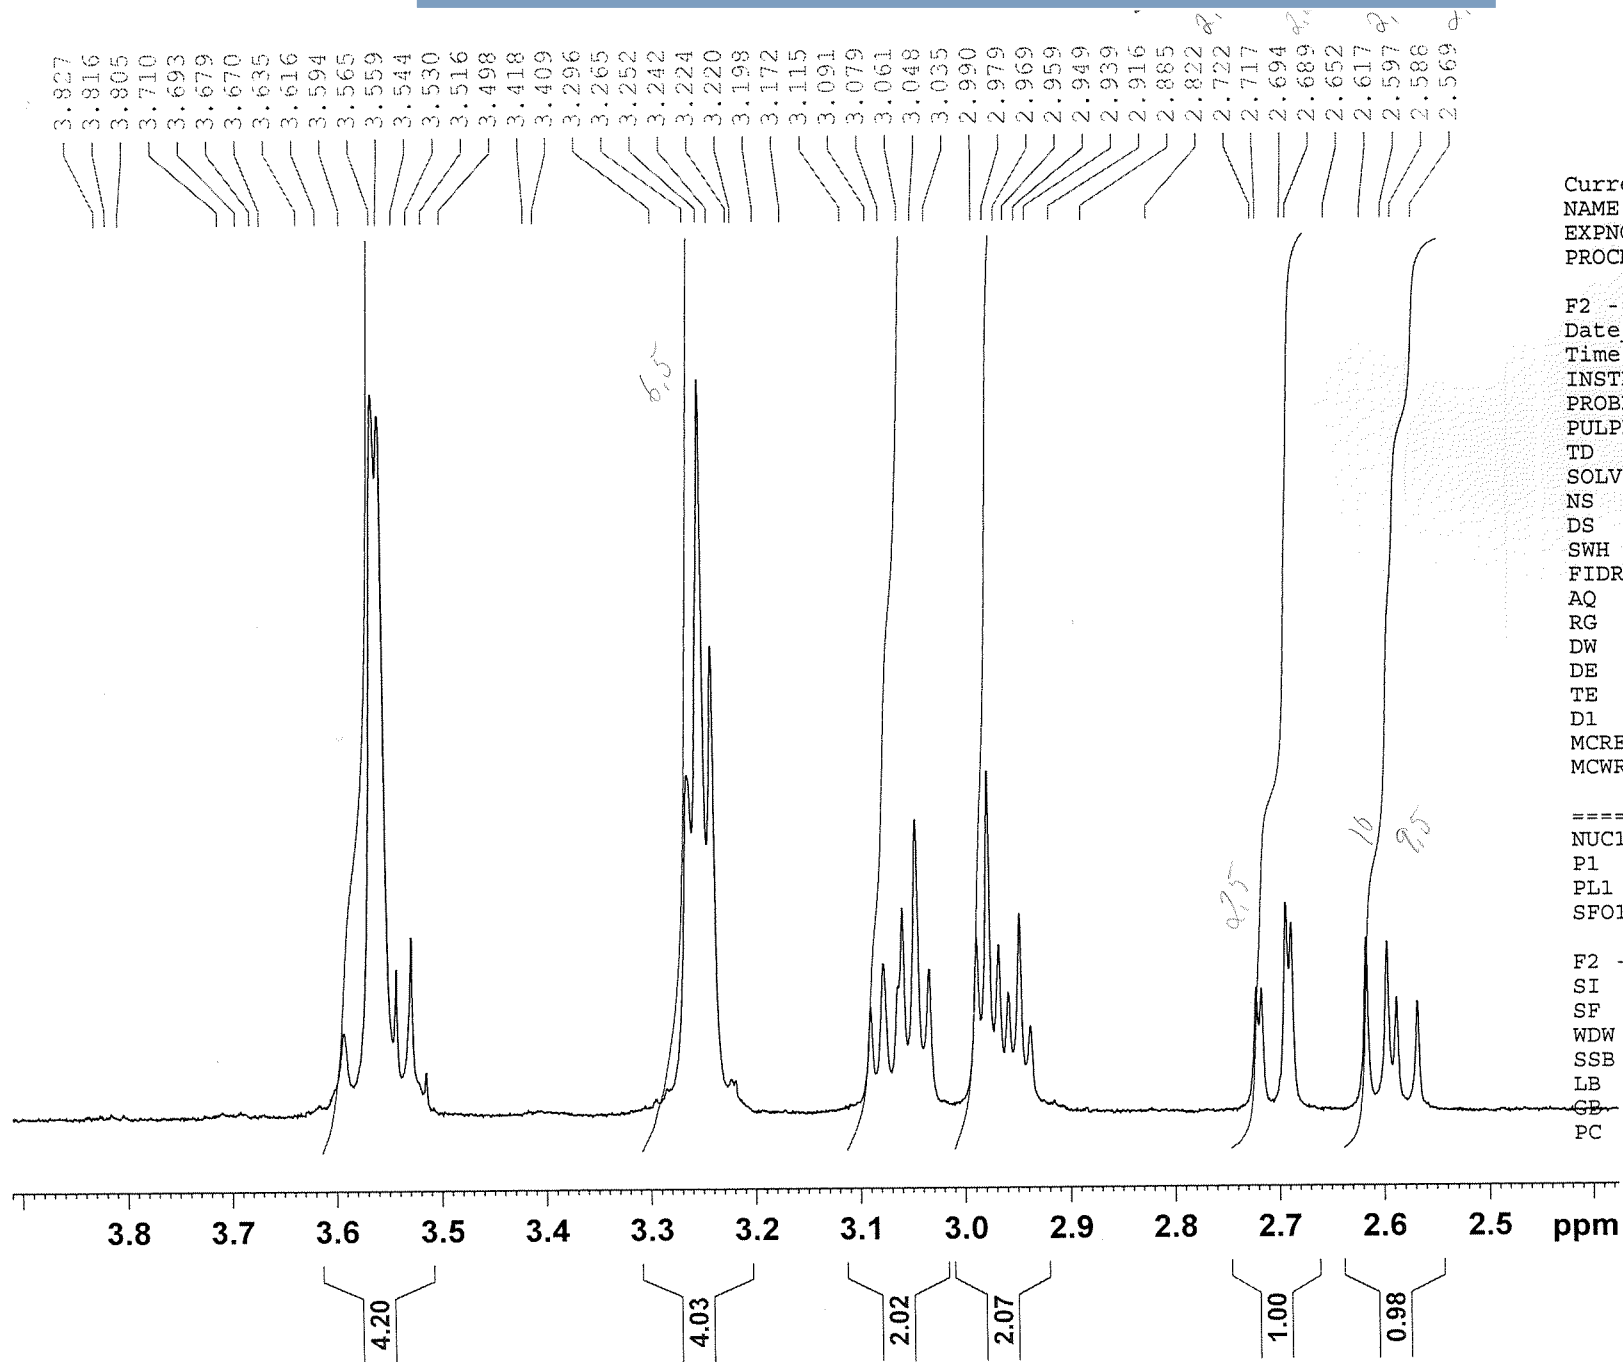

Current Data Parameters  
NAME L2(OH)  
EXPNO 1  
PROCNO 1

F2 - Acquisition Parameters  
Date\_ 20120912  
Time 8.10  
INSTRUM AV500  
PROBHD 5 mm PABBI 1H-  
PULPROG zg30  
TD 65536  
SOLVENT CDCl3  
NS 8  
DS 0  
SWH 8012.820 Hz  
FIDRES 0.122266 Hz  
AQ 4.0895586 sec  
RG 645.1  
DW 62.400 usec  
DE 6.00 usec  
TE 298.1 K  
D1 1.00000000 sec  
MCREST 0.00000000 sec  
MCWRK 0.01500000 sec

===== CHANNEL f1 =====  
NUC1 1H  
P1 6.90 usec  
PL1 1.50 dB  
SFO1 500.1330885 MHz

F2 - Processing parameters  
SI 32768  
SF 500.1300116 MHz  
WDW EM  
SSB 0  
LB 0.10 Hz  
GB 0  
PC 1.40

1,3-Bis(1,4,7-triazacyclonon-1-yl)-2-hydroxypropane (17a)

No title

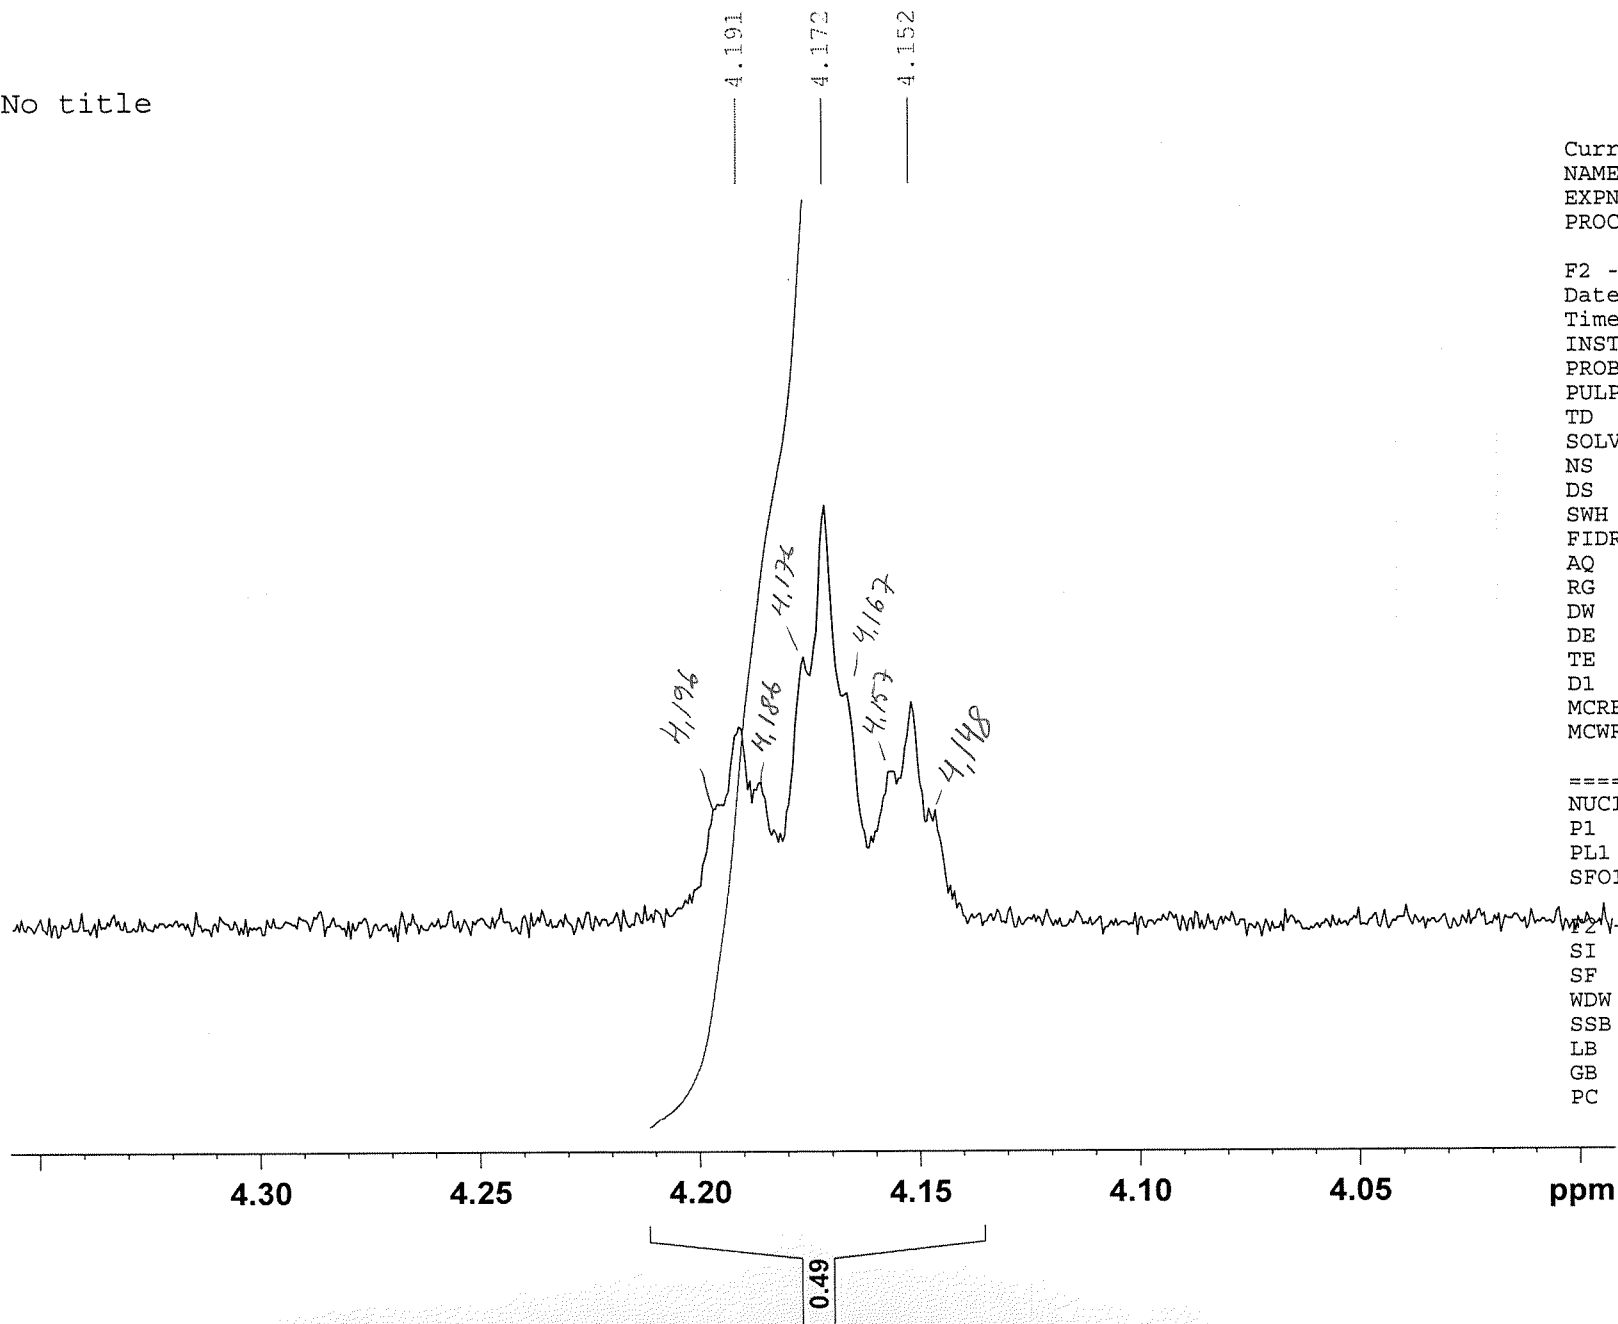

Current Data Parameters  
NAME L2 (OH)  
EXPNO 1  
PROCNO 1

F2 - Acquisition Parameters  
Date\_ 20120912  
Time 8.10  
INSTRUM AV500  
PROBHD 5 mm PABBI 1H-  
PULPROG zg30  
TD 65536  
SOLVENT CDCl3  
NS 8  
DS 0  
SWH 8012.820 Hz  
FIDRES 0.122266 Hz  
AQ 4.0895586 sec  
RG 645.1  
DW 62.400 usec  
DE 6.00 usec  
TE 298.1 K  
D1 1.00000000 sec  
MCREST 0.00000000 sec  
MCWRK 0.01500000 sec

===== CHANNEL f1 =====  
NUC1 1H  
P1 6.90 usec  
PL1 1.50 dB  
SFO1 500.1330885 MHz

F2 - Processing parameters  
SI 32768  
SF 500.1300116 MHz  
WDW EM  
SSB 0  
LB 0.10 Hz  
GB 0  
PC 1.00

1,3-Bis(1,4,7-triazacyclonon-1-yl)-propane (17b)

L1 • x HBr

Bruker, 500 MHz

1/2

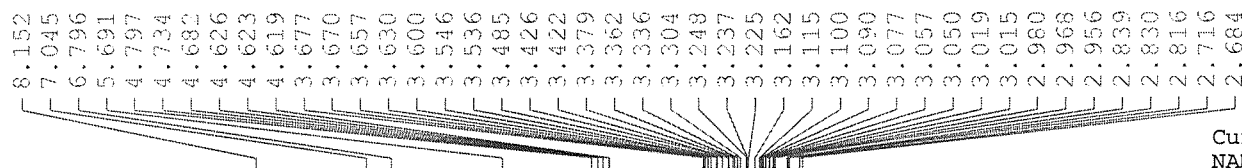

Current Data Parameters  
NAME L1.121207  
EXPNO 1  
PROCNO 1

F2 - Acquisition Parameters  
Date\_ 20121207  
Time 13.44  
INSTRUM AV500  
PROBHD 5 mm PABBI 1H-  
PULPROG zg30  
TD 65536  
SOLVENT ~~cdcl3~~ D<sub>2</sub>O  
NS 8  
DS 0  
SWH 8012.820 Hz  
FIDRES 0.122266 Hz  
AQ 4.0895586 sec  
RG 574.7  
DW 62.400 usec  
DE 6.00 usec  
TE 298.2 K  
D1 1.00000000 sec  
MCREST 0.00000000 sec  
MCWRK 0.01500000 sec

===== CHANNEL f1 =====  
NUC1 1H  
P1 6.90 usec  
PL1 1.50 dB  
SFO1 500.1330885 MHz

F2 - Processing parameters  
SI 32768  
SF 500.1300116 MHz  
WDW no  
SSB 0  
LB 0.00 Hz  
GB 0  
PC 1.40

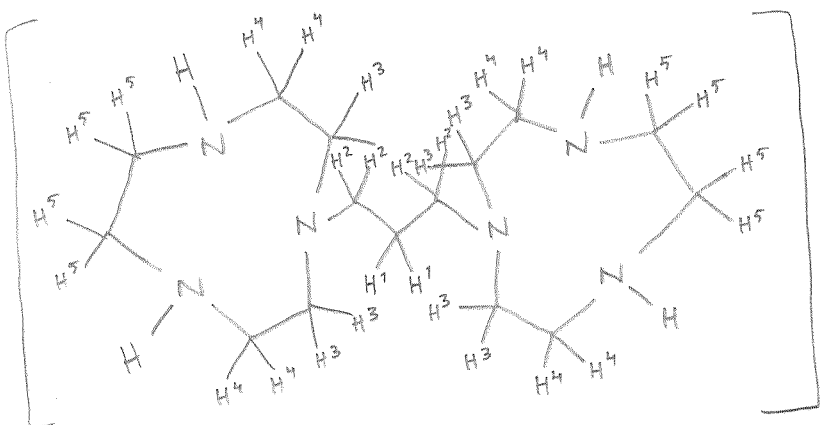

• x HBr

→ 30 x H

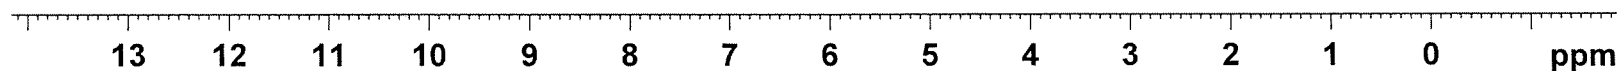

4.11  
4.08  
4.08  
2.03  
1.00

1,3-Bis(1,4,7-triazacyclonon-1-yl)-propane (17b)

2

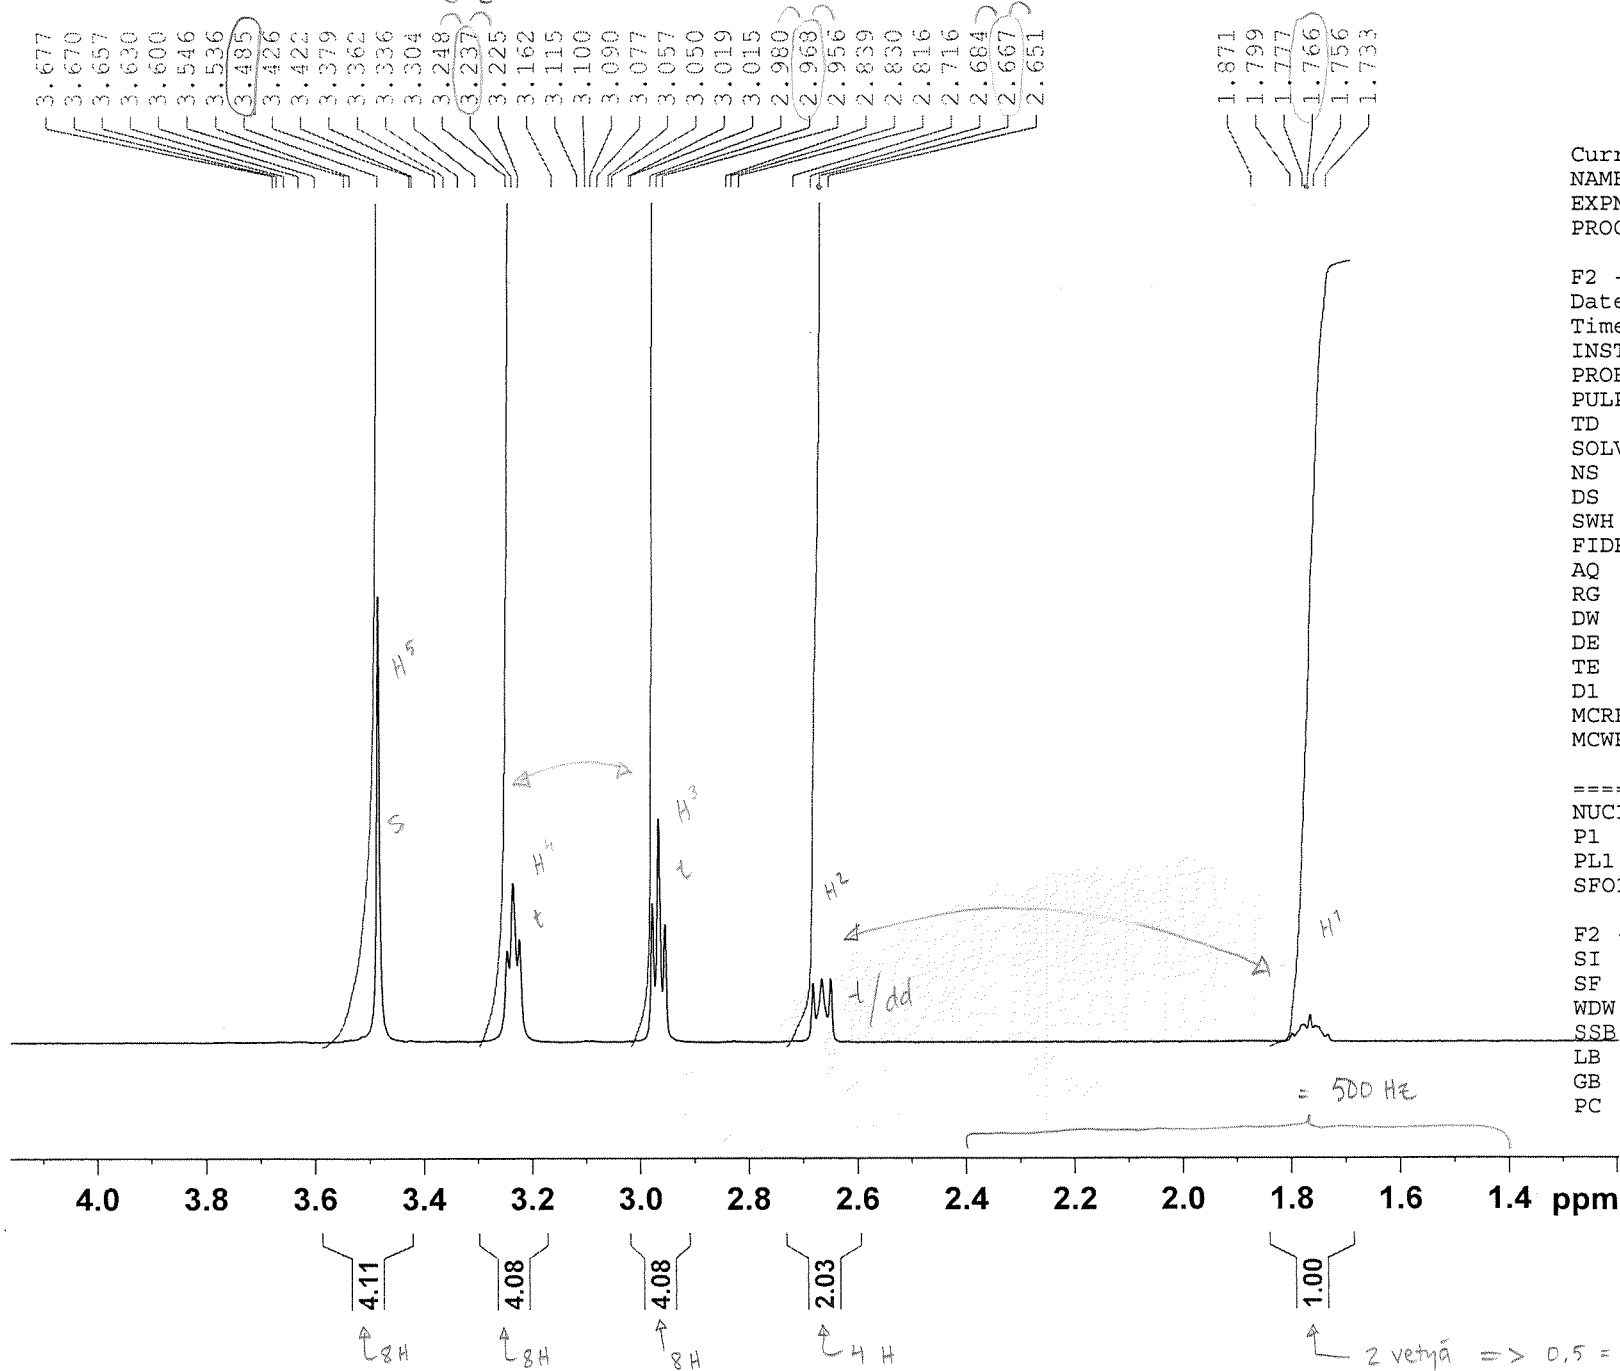

Current Data Parameters  
NAME L1.1.121207  
EXPNO 1  
PROCNO 1

F2 - Acquisition Parameters  
Date\_ 20121207  
Time\_ 13.44  
INSTRUM AV500  
PROBHD 5 mm PABBI 1H-  
PULPROG zg30  
TD 65536  
SOLVENT ~~CDCl3~~ D<sub>2</sub>O  
NS 8  
DS 0  
SWH 8012.820 Hz  
FIDRES 0.122266 Hz  
AQ 4.0895586 sec  
RG 574.7  
DW 62.400 usec  
DE 6.00 usec  
TE 298.2 K  
D1 1.00000000 sec  
MCREST 0.00000000 sec  
MCWRK 0.01500000 sec

===== CHANNEL f1 =====  
NUC1 1H  
P1 6.90 usec  
PL1 1.50 dB  
SFO1 500.1330885 MHz

F2 - Processing parameters  
SI 32768  
SF 500.1300116 MHz  
WDW no  
SSB 0  
LB 0.00 Hz  
GB 0  
PC 1.40

1,3-Bis(1,4,7-triazacyclonon-1-yl)-propane (17b)

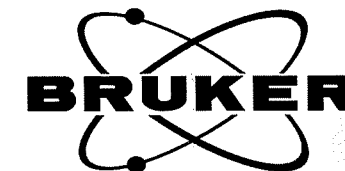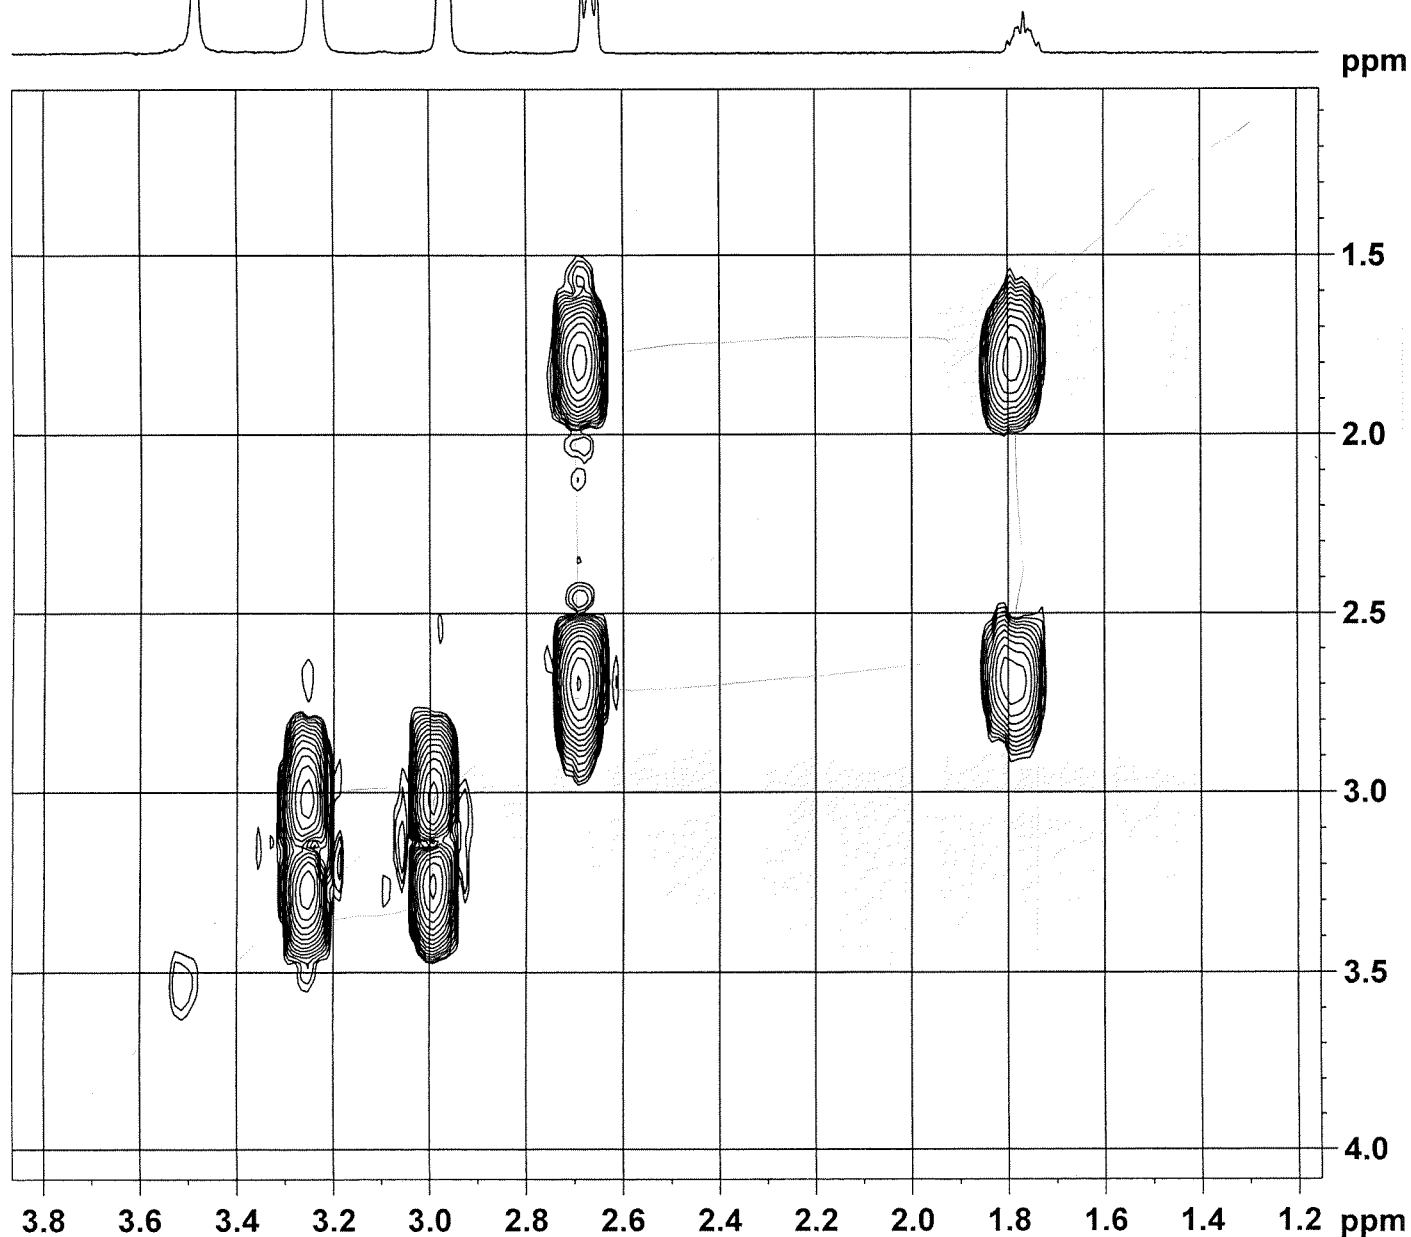

Current Data Parameters  
NAME L1.1.121207  
EXRNO 2  
PROCNO 1  
  
F2 - Acquisition Parameters  
Date\_ 20121207  
Time\_ 13.51  
INSTRUM AV500  
PROBHD 5 mm PABBI 1H-  
PULPROG cosygpmfgrf  
TD 1024  
SOLVENT -DMSO-  $D_2O$   
NS 2  
DS 2  
SWH 6666.667 Hz  
FIDRES 6.510417 Hz  
AQ 0.0769250 sec  
RG 64  
DW 75.000 usec  
DE 6.00 usec  
TE 298.1 K  
D0 0.00000300 sec  
D1 2.00000000 sec  
d13 0.00000400 sec  
D16 0.00020000 sec  
IN0 0.00015000 sec  
MCREST 0.00000000 sec  
MCWRK 2.00000000 sec

===== CHANNEL f1 =====  
NUC1 1H  
P1 6.90 usec  
PL1 1.50 dB  
SFO1 500.1330069 MHz

===== GRADIENT CHANNEL =====  
GPNAM1 SINE.100  
GPNAM2 SINE.100  
GPNAM3 SINE.100  
GPX1 0.00 %  
GPX2 0.00 %  
GPX3 0.00 %  
GPY1 0.00 %  
GPY2 0.00 %  
GPY3 0.00 %  
GPZ1 16.00 %  
GPZ2 12.00 %  
GPZ3 40.00 %  
P16 1000.00 usec

F1 - Acquisition parameters  
ND0 1  
TD 120  
SFO1 500.133 MHz  
FIDRES 55.55557 Hz  
SW 13.330 ppm  
FhMODE QF

F2 - Processing parameters  
SI 1024  
SF 500.1300000 MHz  
WDW SINE  
SSB 0  
LB 0.00 Hz  
GB 0  
FC 1.00

F1 - Processing parameters  
SI 1024  
MC2 QF  
SF 500.1300000 MHz  
WDW SINE  
SSB 0  
LB 0.00 Hz  
GB 0

1,3-Bis(1,5,9-triazacyclododec-1-yl)-2-hydroxypropane (21b):

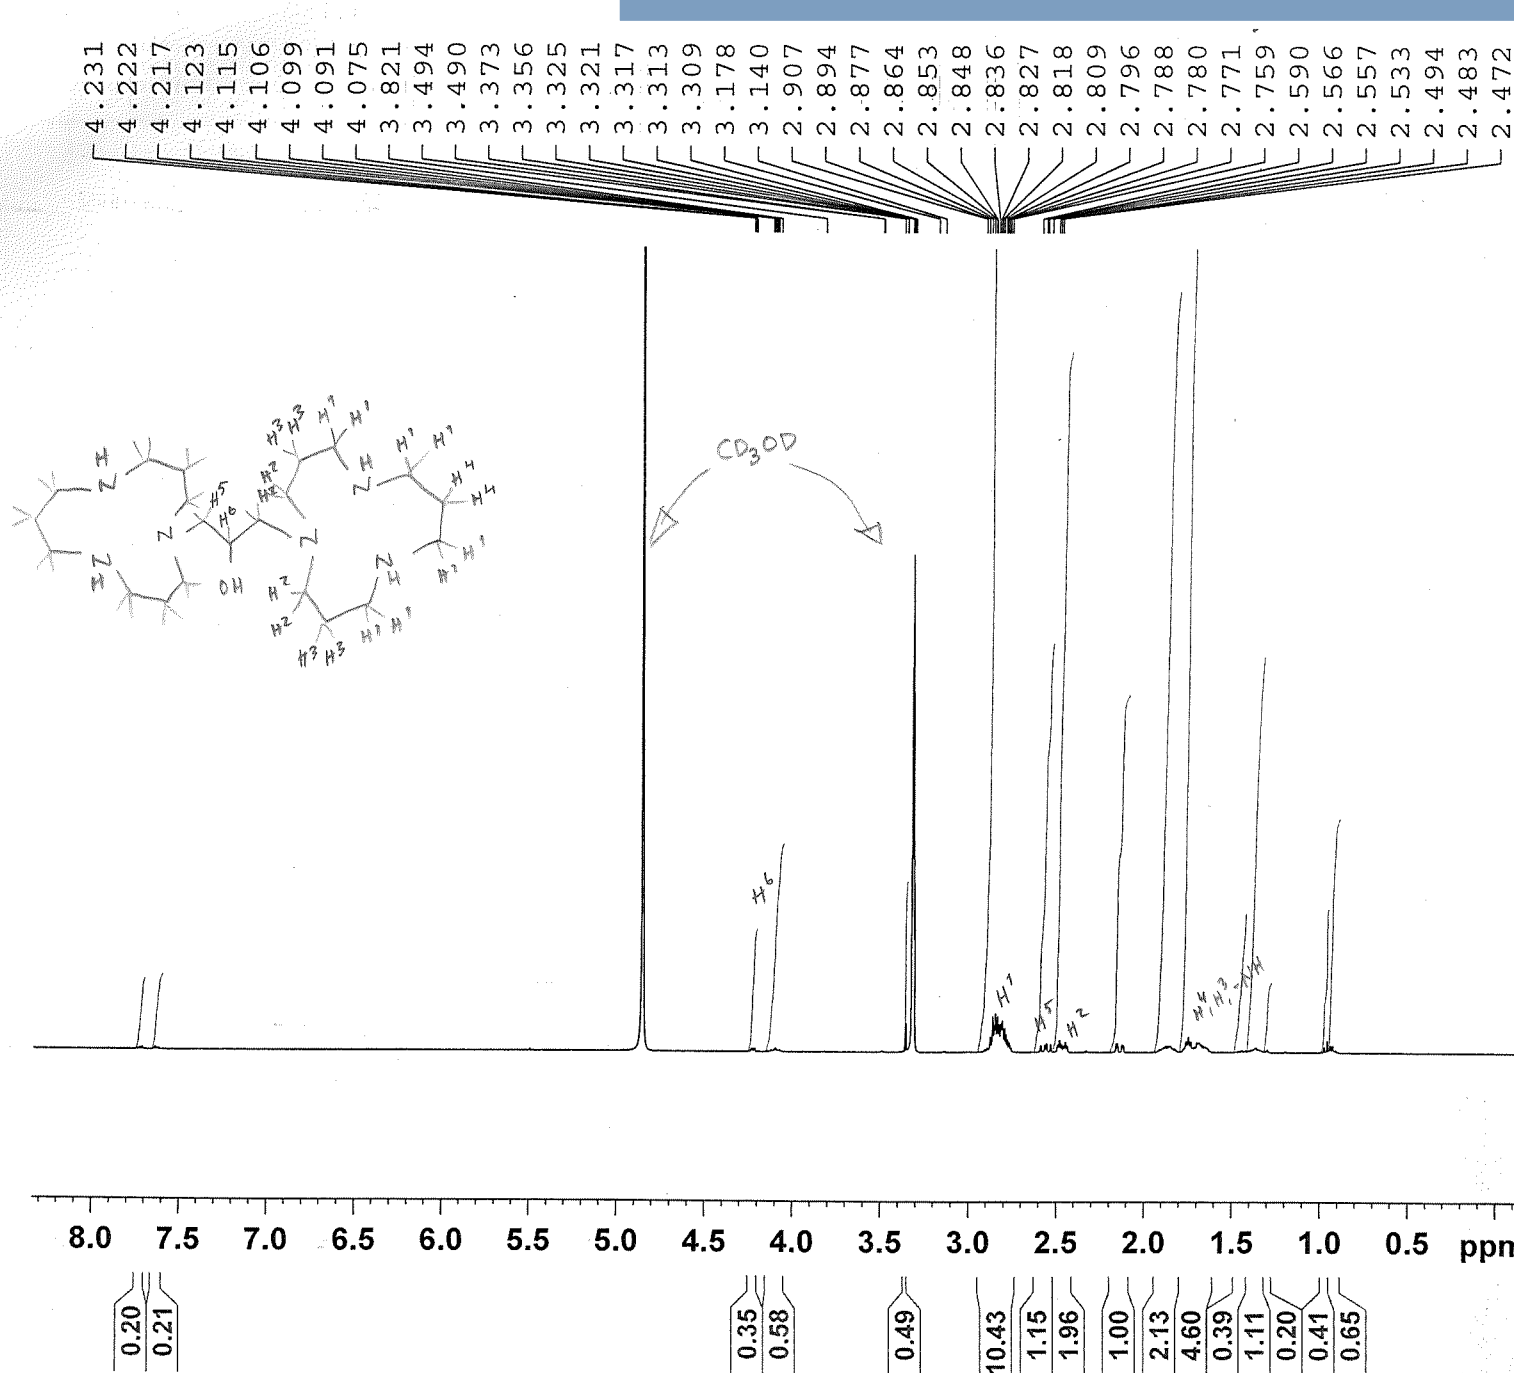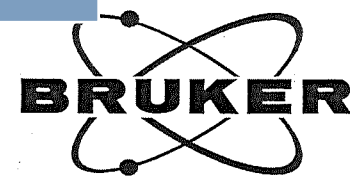

Current Data Parameters  
NAME L2OH  
EXPNO 1  
PROCNO 1

F2 - Acquisition Parameters  
Date\_ 20130225  
Time 13.01  
INSTRUM av400  
PROBHD 5 mm BBO BB-1H  
PULPROG zg30  
TD 65536  
SOLVENT ~~CDCl3~~ CD3OD  
NS 16  
DS 2  
SWH 8250.825 Hz  
FIDRES 0.125898 Hz  
AQ 3.9715922 sec  
RG 512  
DW 60.600 usec  
DE 6.00 usec  
TE 298.1 K  
D1 1.00000000 sec  
MCREST 0.00000000 sec  
MCWRK 0.01500000 sec

===== CHANNEL f1 =====  
NUC1 1H  
P1 8.10 usec  
PL1 -1.00 dB  
SFO1 399.7524686 MHz

F2 - Processing parameters  
SI 32768  
SF 399.7500000 MHz  
WDW EM  
SSB 0  
LB 0.30 Hz  
GB 0  
PC 1.00

1H ~ 0.58

ARVIOITU PUHTAUS:  
80-90%  $\xrightarrow{oli}$  0.9x



1,3-Bis(1,5,9-triazacyclododec-1-yl)-2-hydroxypropane (21b):

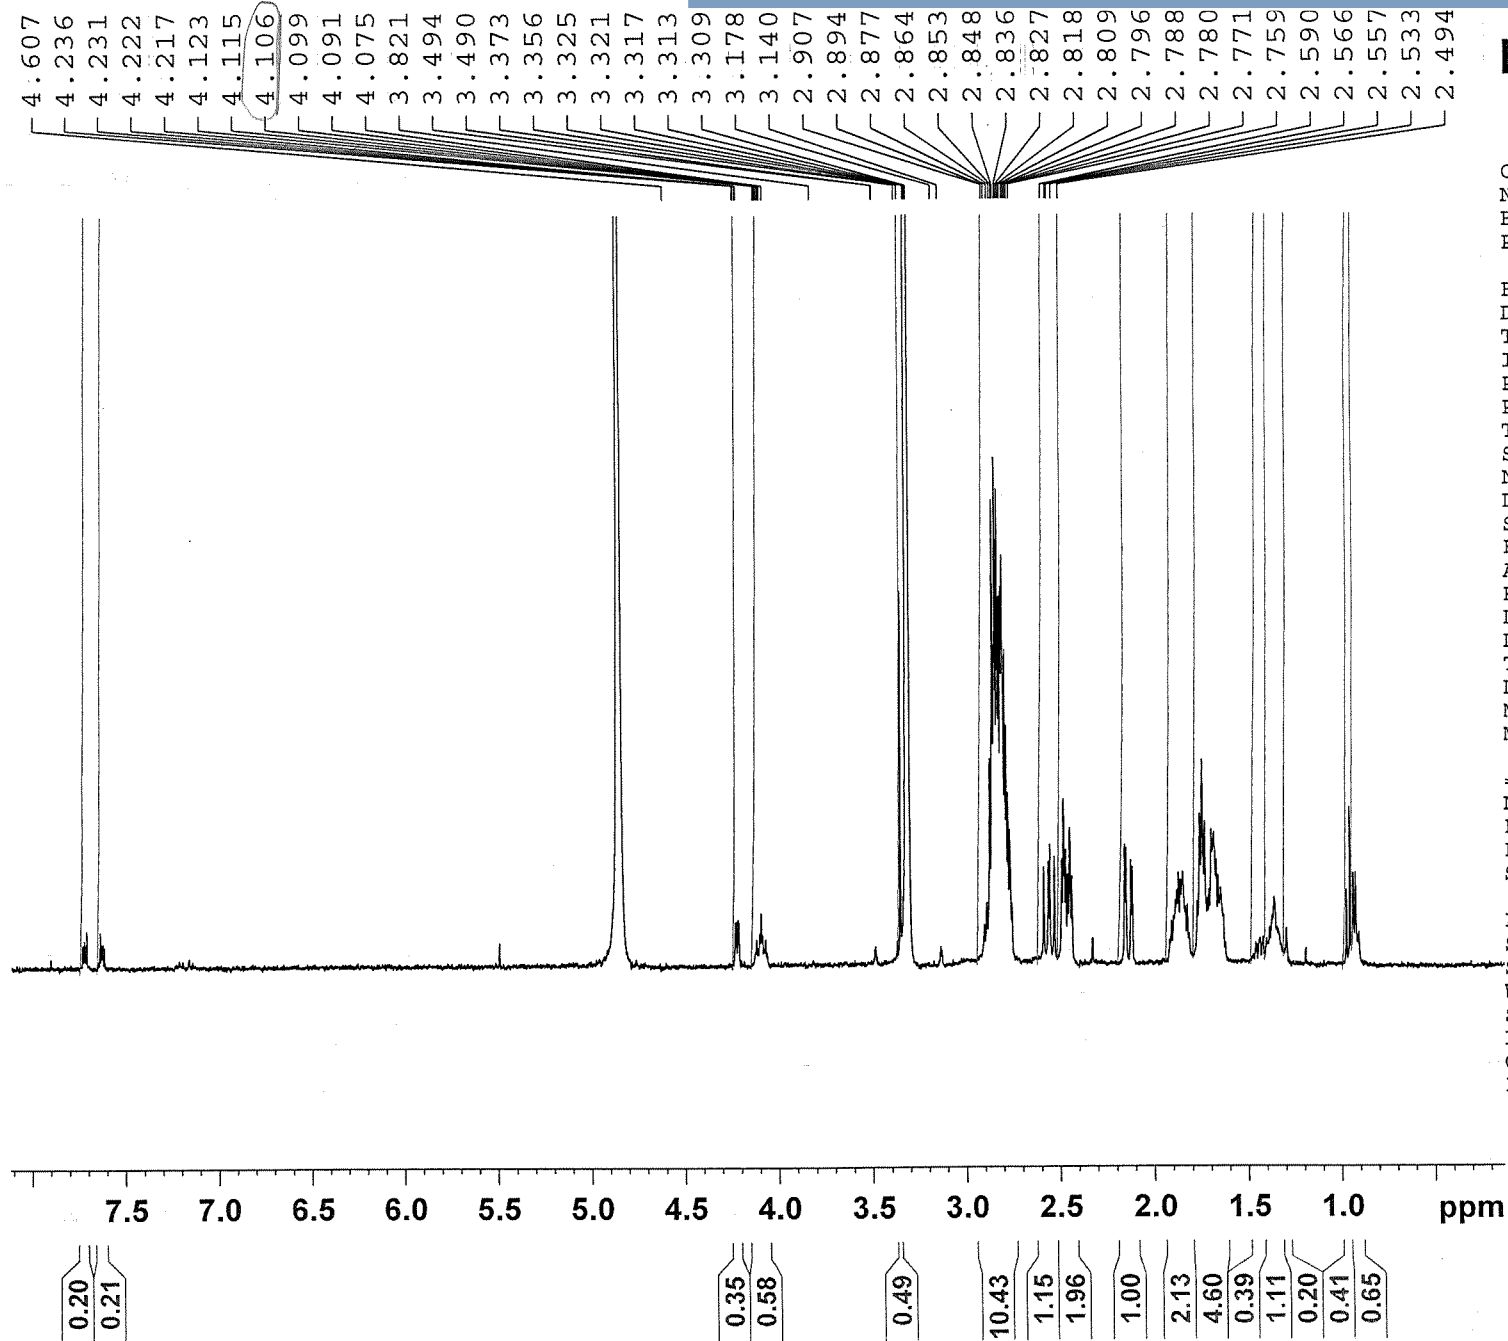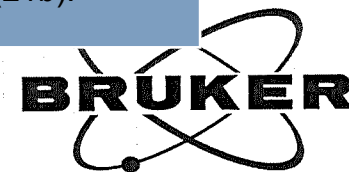

Current Data Parameters  
NAME L2OH  
EXPNO 1  
PROCNO 1

F2 - Acquisition Parameters  
Date\_ 20130225  
Time 13.01  
INSTRUM av400  
PROBHD 5 mm BBO BB-1H  
PULPROG zg30  
TD 65536  
SOLVENT CDCl3 CH<sub>3</sub>OD  
NS 16  
DS 2  
SWH 8250.825 Hz  
FIDRES 0.125898 Hz  
AQ 3.9715922 sec  
RG 512  
DW 60.600 usec  
DE 6.00 usec  
TE 298.1 K  
D1 1.00000000 sec  
MCREST 0.00000000 sec  
MCWRK 0.01500000 sec

===== CHANNEL f1 =====  
NUC1 1H  
P1 8.10 usec  
PL1 -1.00 dB  
SFO1 399.7524686 MHz

F2 - Processing parameters  
SI 32768  
SF 399.7500000 MHz  
WDW EM  
SSB 0  
LB 0.30 Hz  
GB 0  
PC 1.00

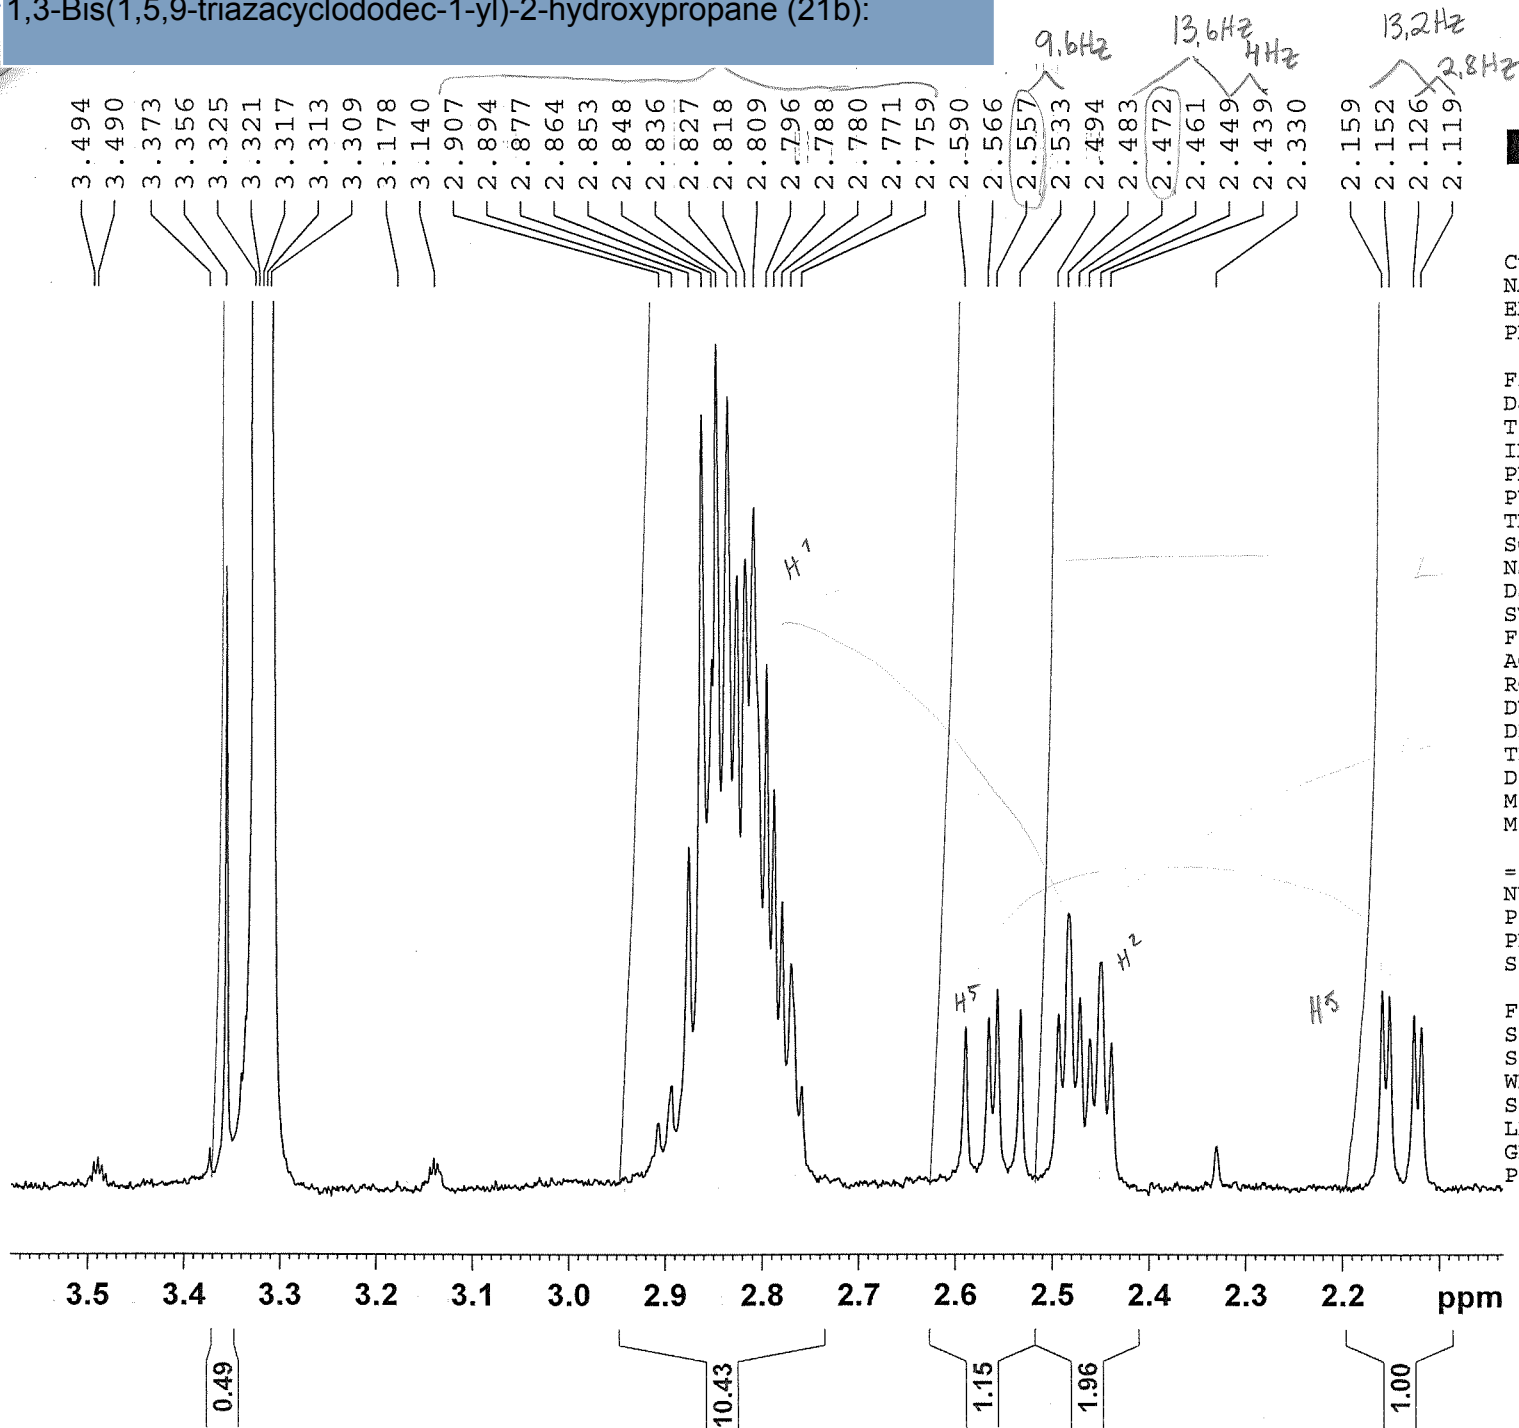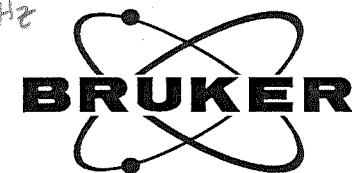

Current Data Parameters  
NAME L2OH  
EXPNO 1  
PROCNO 1

F2 - Acquisition Parameters  
Date\_ 20130225  
Time 13.01  
INSTRUM av400  
PROBHD 5 mm BBO BB-1H  
PULPROG zg30  
TD 65536  
SOLVENT ~~CDCl3~~ CD<sub>3</sub>OD  
NS 16  
DS 2  
SWH 8250.825 Hz  
FIDRES 0.125898 Hz  
AQ 3.9715922 sec  
RG 512  
DW 60.600 usec  
DE 6.00 usec  
TE 298.1 K  
D1 1.00000000 sec  
MCREST 0.00000000 sec  
MCWRK 0.01500000 sec

===== CHANNEL f1 =====  
NUC1 1H  
P1 8.10 usec  
PL1 -1.00 dB  
SFO1 399.7524686 MHz

F2 - Processing parameters  
SI 32768  
SF 399.7500000 MHz  
WDW EM  
SSB 0  
LB 0.30 Hz  
GB 0  
PC 1.00

1,3-Bis(1,5,9-triazacyclododec-1-yl)-2-hydroxypropane (21b):

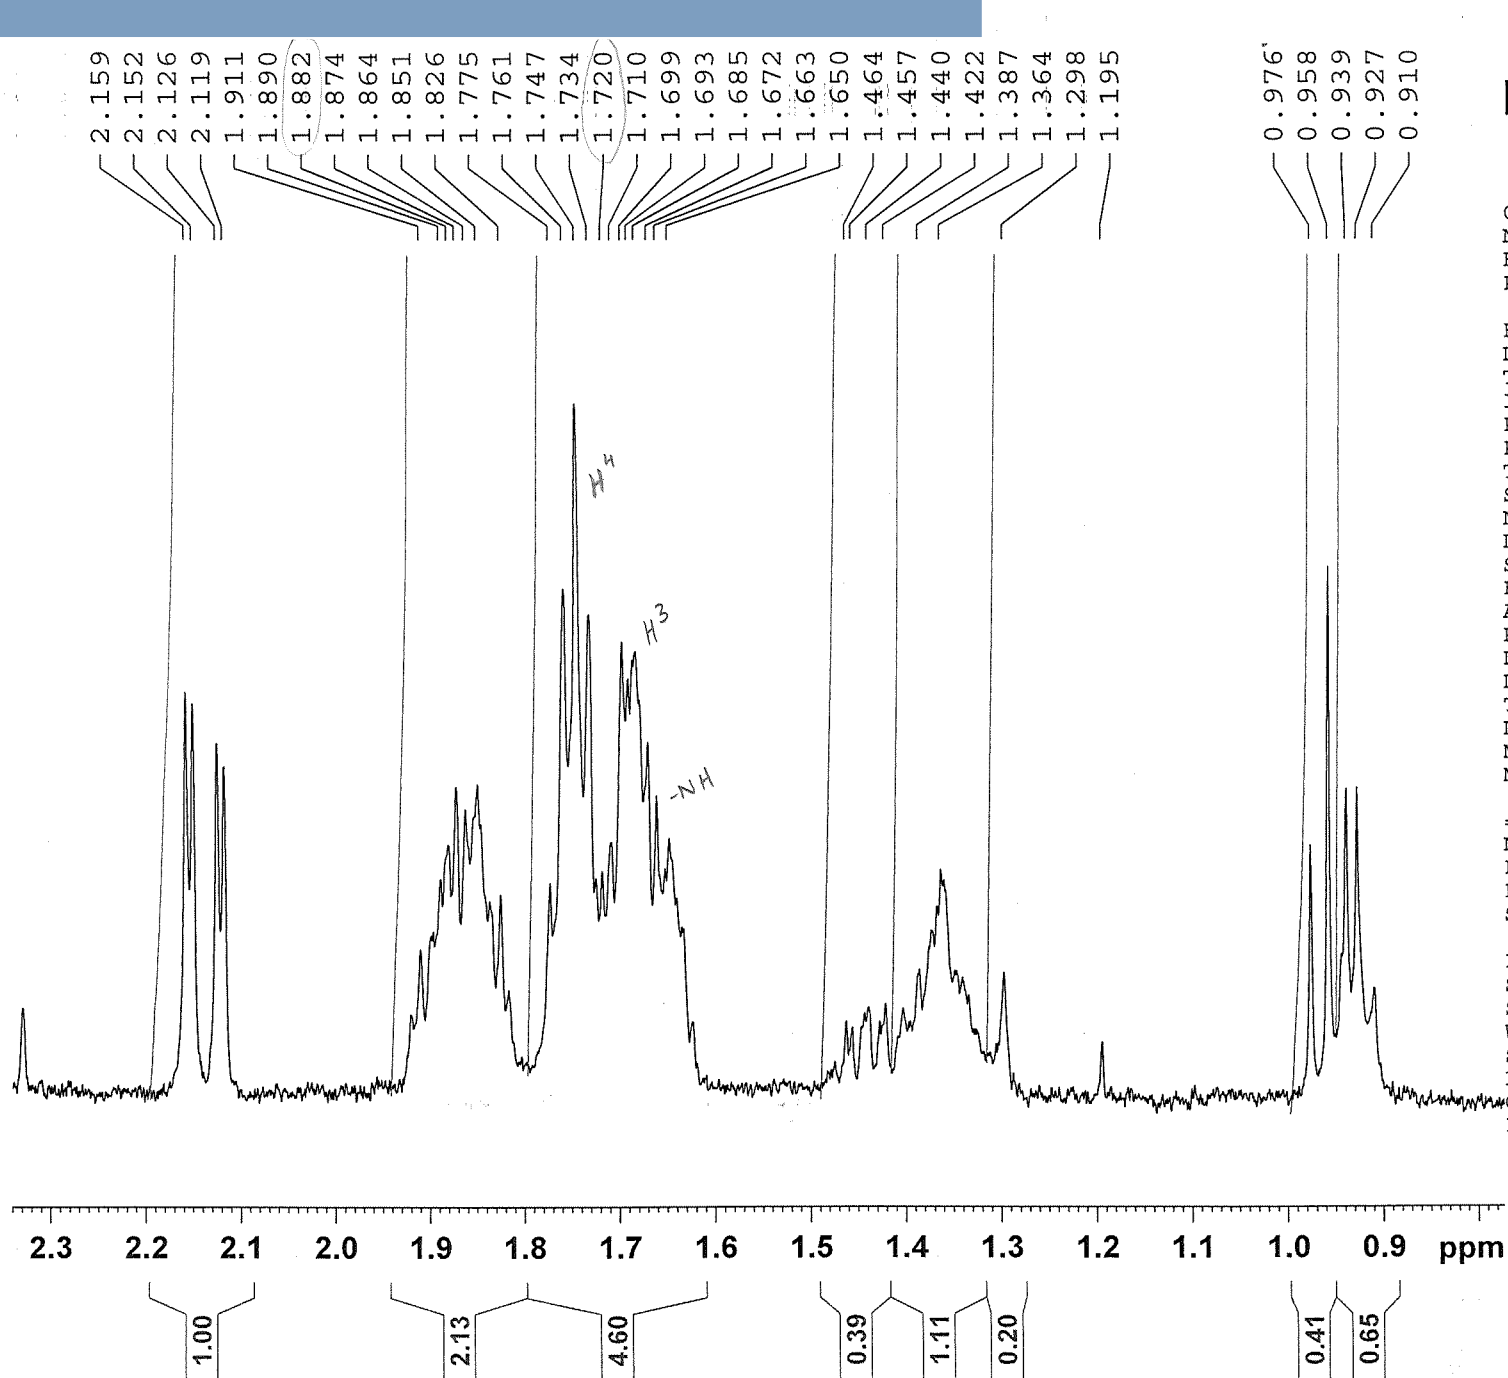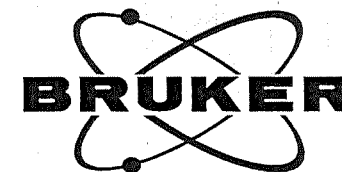

Current Data Parameters  
NAME L2OH  
EXPNO 1  
PROCNO 1

F2 - Acquisition Parameters

Date\_ 20130225  
Time\_ 13.01  
INSTRUM av400  
PROBHD 5 mm BBO BB-1H  
PULPROG zg30  
TD 65536  
SOLVENT ~~CDCl3~~ CD<sub>3</sub>OD  
NS 16  
DS 2  
SWH 8250.825 Hz  
FIDRES 0.125898 Hz  
AQ 3.9715922 sec  
RG 512  
DW 60.600 usec  
DE 6.00 usec  
TE 298.1 K  
D1 1.0000000 sec  
MCREST 0.0000000 sec  
MCWRK 0.0150000 sec

===== CHANNEL f1 =====

NUC1 1H  
P1 8.10 usec  
PL1 -1.00 dB  
SFO1 399.7524686 MHz

F2 - Processing parameters

SI 32768  
SF 399.7500000 MHz  
WDW EM  
SSB 0  
LB 0.30 Hz  
GB 0  
PC 1.00
